# Supplementary material for: Common, low-frequency, and rare genetic variants associated with lipoprotein subclasses and triglyceride measures in Finnish men from the METSIM study
Source: PLoS Genet. 2017 Oct 30;13(10):e1007079. doi: 10.1371/journal.pgen.1007079 (PMC5679656; doi:10.1371/journal.pgen.1007079)
Supplement: S3 Table — Variants and association data in this table were collected from 33 published GWAS, fine-mapping, and exome-sequencing studies. The reported trait, Beta, and P-value are taken from the study with the lowest p-value. N.R., data not reported in the study; Chr, chromosome; Position, hg19; Trait, strongest associated trait from study shown; EA, effect allele; NEA, non-effect allele; N, sample size of the study; Reference, the first study in the list is the study with the lowest p-value for the given trait. (XLSX) [file pgen.1007079.s010.xlsx]

## Sheet: S Table 3
S3 Table. Previously reported associations between 1,714 variants and one or more lipid or lipoprotein traits.
Variant	Chr	Position	Trait	EA	NEA	EAF	Beta	P- value	N	Population	References
rs1077514	1	23766233	TC	C	T	0.15	-0.03	6e-09	21312	European	Kathiresan (Nat Genet 2008);Willer (Nat Genet 2008)
chr1:25580095	1	25580095	LDL	A	G	0.43	-0.132	2.6e-23	28797	European	van Leeuwen (Nat Comm 2015)
chr1:25724005	1	25724005	LDL	C	T	0.505	0.18	5.5e-37	34179	European	van Leeuwen (Nat Comm 2015)
rs586178	1	25747230	TC	C	G	0.5	0.037	3.1e-09	62044	European	Surakka (Nat Genet 2015)
chr1:25754025	1	25754025	LDL	G	C	0.438	0.091	4.8e-15	36410	European	van Leeuwen (Nat Comm 2015)
chr1:25768937	1	25768937	TC	A	G	0.443	-0.144	1.3e-31	39257	European	van Leeuwen (Nat Comm 2015);Kim (Nat Genet 2011)
rs12027135	1	25775733	LDL_C	A	T	0.46	-0.03	2e-14	99900	European	Teslovich (Nature 2010);Surakka (Nat Genet 2015)
rs12748152	1	27138393	HDL_C	T	C	0.09	-0.051	1e-15	156000	European	Willer (Nat Genet 2013);Teslovich (Nature 2010);Kim (Nat Genet 2011);Surakka (Nat Genet 2015)
rs79598313	1	27284913	LDL_C	T	C	0.02	0.12	7.1e-10	58212	European	Surakka (Nat Genet 2015)
rs72634501	1	39551488	HDL_C	T	C	0.77	0.044	8.1e-10	60677	European	Surakka (Nat Genet 2015)
rs4660808	1	40018509	TG	T	C	N.R.	+	3e-08	12545	EastAsian	Kim (Nat Genet 2011)
rs4660293	1	40028180	HDL_C	G	A	0.24	-0.035	3e-18	171526	European	Willer (Nat Genet 2013);Surakka (Nat Genet 2015)
chr1:40035928	1	40035928	HDL_C	T	G	0.215	-0.02	4.8e-08	36626	European	van Leeuwen (Nat Comm 2015)
1-54499972	1	54727384	IDL_FC	A	T	0.05	-0.3	1.26e-12	8891	European	Kettunen (Nat Genet 2012)
1-54500617	1	54728029	IDL_FC	T	C	0.04	-0.31	3.7e-12	8891	European	Kettunen (Nat Genet 2012)
rs3766432	1	54729952	IDL_FC	C	G	0.05	-0.3	1.5e-12	8891	European	Kettunen (Nat Genet 2012)
1-54933070	1	55160482	L_LDL_CE	T	G	0.08	-0.23	3.03e-12	8891	European	Kettunen (Nat Genet 2012)
rs61768793	1	55193477	L_LDL_CE	G	A	0.05	-0.31	1.13e-10	8891	European	Kettunen (Nat Genet 2012)
1-54997361	1	55224773	L_LDL_CE	C	A	0.05	-0.33	1.92e-10	8891	European	Kettunen (Nat Genet 2012)
chr1:55493584	1	55493584	TC	A	C	0.237	-0.07	5.3e-15	35580	European	van Leeuwen (Nat Comm 2015)
rs11206510	1	55496039	L_LDL_FC	C	T	0.16	-0.15	3.81e-11	8891	European	Kettunen (Nat Genet 2012);Kristiansson (Circ Cardiovasc Genet 2012)
rs2479409	1	55504650	LDL_C	G	A	0.32	0.064	3e-50	187000	European	Willer (Nat Genet 2013);Teslovich (Nature 2010);Kathiresan (Nat Genet 2009); Kristiansson (Circ Cardiovasc Genet 2012);Surakka (Nat Genet 2015)
rs11591147	1	55505647	LDL_C	G	T	0.98	0.528	2.2e-92	53009	European	Surakka (Nat Genet 2015);Willer (Nat Genet 2013);Teslovich (Nature 2010);Dumitrescu (PLoS Genet 2011)
chr1:55521195	1	55521195	LDL	T	C	0.076	-0.079	5.5e-09	30971	European	van Leeuwen (Nat Comm 2015)
rs28362263	1	55523855	LDL_C	A	G	0.097	-0.206	3.1e-09	6832	African-American	Wu (PLoS Genet 2013)
rs28362286	1	55529215	LDL_C	A	C	0.009	-0.956	4.8e-17	6832	African-American	Wu (PLoS Genet 2013)
rs191448950	1	55584844	TC	G	A	0.99	0.468	5.9e-73	56301	European	Surakka (Nat Genet 2015)
rs17111684	1	55625548	LDL_C	A	G	0.12	-9.01	2.4e-17	7861	African-American	Coram (Am J Hum Gen 2013)
rs10888908	1	55726519	L_LDL_FC	C	T	0.91	0.22	2.57e-14	8891	European	Kettunen (Nat Genet 2012)
rs6662286	1	55730327	L_LDL_FC	C	T	0.89	0.17	2.3e-11	8891	European	Kettunen (Nat Genet 2012)
rs2088487	1	55739925	L_LDL_C	C	T	0.09	-0.23	1.48e-14	8891	European	Kettunen (Nat Genet 2012)
1-55518340	1	55745752	L_LDL_FC	T	C	0.12	-0.17	1.54e-11	8891	European	Kettunen (Nat Genet 2012)
rs207154	1	55781281	L_LDL_FC	C	T	0.1	-0.18	2.82e-11	8891	European	Kettunen (Nat Genet 2012)
rs207167	1	55798859	Gp/TC	C	T	0.96	-0.4	7.45e-12	8891	European	Kettunen (Nat Genet 2012)
rs207155	1	55804902	L_LDL_FC	C	T	0.92	0.18	1.94e-10	8891	European	Kettunen (Nat Genet 2012)
rs207129	1	55814908	L_LDL_FC	G	A	0.92	0.18	2.23e-10	8891	European	Kettunen (Nat Genet 2012)
rs1998013	1	55958030	LDL_C	T	C	N.R.	-	2e-20	173000	European	Willer (Nat Genet 2013);Teslovich (Nature 2010)
rs72669744	1	56116505	L_LDL_FC	T	C	0.02	-0.59	1.1e-19	8891	European	Kettunen (Nat Genet 2012);Kettunen et al (Nat Genet 2012)
1-55892749	1	56120161	L_LDL_FC	A	C	0.02	-0.59	1.16e-19	8891	European	Kettunen (Nat Genet 2012)
rs17112596	1	56120296	L_LDL_FC	T	C	0.02	-0.59	1.16e-19	8891	European	Kettunen (Nat Genet 2012)
1-56127133	1	56354545	L_LDL_FC	T	C	0.03	-0.52	4.63e-18	8891	European	Kettunen (Nat Genet 2012)
1-56174277	1	56401689	L_LDL_C	C	T	0.03	-0.52	5.3e-18	8891	European	Kettunen (Nat Genet 2012)
rs626787	1	62901243	MobCH	G	C	0.27	-0.12	1.3e-11	8891	European	Kettunen (Nat Genet 2012)
rs631106	1	62901807	MobCH	A	C	0.27	-0.12	2.72e-11	8891	European	Kettunen (Nat Genet 2012)
rs9436221	1	62903359	MobCH	C	T	0.27	-0.12	1.25e-11	8891	European	Kettunen (Nat Genet 2012)
rs9436222	1	62903363	MobCH	G	C	0.27	-0.12	1.25e-11	8891	European	Kettunen (Nat Genet 2012)
rs9436223	1	62903547	MobCH	T	C	0.27	-0.12	1.35e-11	8891	European	Kettunen (Nat Genet 2012)
rs12029068	1	62904295	MobCH	T	C	0.27	-0.12	1.21e-11	8891	European	Kettunen (Nat Genet 2012)
rs9436661	1	62904575	MobCH	G	T	0.23	-0.12	7.83e-11	8891	European	Kettunen (Nat Genet 2012)
rs10493322	1	62905893	MobCH	T	C	0.27	-0.12	3.2e-11	8891	European	Kettunen (Nat Genet 2012)
rs638714	1	62906489	MobCH	T	G	0.27	-0.12	3.09e-11	8891	European	Kettunen (Nat Genet 2012)
rs638305	1	62906537	MobCH	T	G	0.27	-0.12	3.1e-11	8891	European	Kettunen (Nat Genet 2012)
rs637723	1	62906728	Gp/Serum_TG	T	C	0.27	0.12	3.44e-11	8891	European	Kettunen (Nat Genet 2012)
rs656297	1	62907595	MobCH	G	A	0.27	-0.12	3.42e-11	8891	European	Kettunen (Nat Genet 2012)
rs642845	1	62908235	MobCH	C	T	0.27	-0.12	3.17e-11	8891	European	Kettunen (Nat Genet 2012)
rs641540	1	62908538	MobCH	G	A	0.27	-0.12	3.17e-11	8891	European	Kettunen (Nat Genet 2012)
rs598253	1	62911341	MobCH	C	T	0.27	-0.12	3.09e-11	8891	European	Kettunen (Nat Genet 2012)
rs11207969	1	62911751	MobCH	G	A	0.27	-0.12	3.34e-11	8891	European	Kettunen (Nat Genet 2012)
rs659656	1	62912120	MobCH	G	C	0.27	-0.12	3.08e-11	8891	European	Kettunen (Nat Genet 2012)
rs10158897	1	62912919	MobCH	T	C	0.26	-0.12	6.21e-12	8891	European	Kettunen (Nat Genet 2012)
rs783291	1	62914978	Gp/Serum_TG	A	G	0.26	0.12	1.28e-10	8891	European	Kettunen (Nat Genet 2012)
rs11207970	1	62915473	MobCH	T	C	0.27	-0.12	3.17e-11	8891	European	Kettunen (Nat Genet 2012)
rs583609	1	62916796	MobCH	C	T	0.27	-0.12	3.37e-11	8891	European	Kettunen (Nat Genet 2012)
rs597470	1	62917796	Gp/Serum_TG	G	T	0.25	0.12	6.61e-11	8891	European	Kettunen (Nat Genet 2012)
rs597078	1	62917857	MobCH	A	G	0.27	-0.12	3.17e-11	8891	European	Kettunen (Nat Genet 2012)
rs597076	1	62917865	MobCH	A	T	0.25	-0.12	5.52e-11	8891	European	Kettunen (Nat Genet 2012)
rs630144	1	62918864	MobCH	G	A	0.27	-0.12	3.17e-11	8891	European	Kettunen (Nat Genet 2012)
rs636523	1	62920008	MobCH	G	A	0.27	-0.12	2.98e-11	8891	European	Kettunen (Nat Genet 2012)
rs636497	1	62920029	MobCH	G	A	0.27	-0.12	3.18e-11	8891	European	Kettunen (Nat Genet 2012)
rs624660	1	62920388	MobCH	A	C	0.27	-0.12	3.33e-11	8891	European	Kettunen (Nat Genet 2012)
rs634341	1	62921422	MobCH	C	T	0.27	-0.12	3.1e-11	8891	European	Kettunen (Nat Genet 2012)
rs3913007	1	62921586	MobCH	C	T	0.26	-0.12	8.5e-12	8891	European	Kettunen (Nat Genet 2012)
rs4350231	1	62922660	MobCH	A	G	0.29	-0.12	8.21e-13	8891	European	Kettunen (Nat Genet 2012)
rs12023489	1	62923858	Gp/Serum_TG	A	G	0.27	0.13	4.34e-12	8891	European	Kettunen (Nat Genet 2012)
rs12037659	1	62923863	MobCH	T	C	0.27	-0.12	3.1e-11	8891	European	Kettunen (Nat Genet 2012)
rs9988450	1	62924448	TG	C	T	0.68	0.077	5.9e-34	59951	European	Surakka (Nat Genet 2015)
rs1305520	1	62926057	MobCH	T	A	0.71	0.12	4.33e-12	8891	European	Kettunen (Nat Genet 2012)
rs1167996	1	62927797	MobCH	G	T	0.74	0.12	3.1e-11	8891	European	Kettunen (Nat Genet 2012)
rs998403	1	62928549	MobCH	A	G	0.29	-0.12	4.12e-12	8891	European	Kettunen (Nat Genet 2012)
rs1167998	1	62931632	TG	C	A	0.32	-0.091	2e-12	95372	European	Teslovich (Nature 2010);Kettunen (Nat Genet 2012);Kim (Nat Genet 2011)
rs1168002	1	62934308	MobCH	G	A	0.71	0.12	7.62e-12	8891	European	Kettunen (Nat Genet 2012)
rs1007205	1	62936912	Gp/Serum_TG	C	T	0.73	-0.12	6.77e-11	8891	European	Kettunen (Nat Genet 2012)
rs10889330	1	62939466	MobCH	C	G	0.27	-0.12	3.09e-11	8891	European	Kettunen (Nat Genet 2012)
rs1979722	1	62940097	MobCH	A	G	0.27	-0.12	7.48e-12	8891	European	Kettunen (Nat Genet 2012)
rs10889331	1	62943007	MobCH	T	G	0.74	0.12	3.08e-11	8891	European	Kettunen (Nat Genet 2012)
rs1168009	1	62943954	MobCH	A	G	0.74	0.12	3.08e-11	8891	European	Kettunen (Nat Genet 2012)
rs1168010	1	62943979	MobCH	A	G	0.68	0.12	1.74e-10	8891	European	Kettunen (Nat Genet 2012)
rs1183260	1	62945418	MobCH	G	A	0.73	0.12	6.26e-11	8891	European	Kettunen (Nat Genet 2012)
rs6587976	1	62945631	MobCH	T	C	0.27	-0.12	3.07e-11	8891	European	Kettunen (Nat Genet 2012)
rs1305521	1	62949034	MobCH	G	A	0.73	0.12	6.06e-11	8891	European	Kettunen (Nat Genet 2012)
rs11207974	1	62949960	MobCH	C	T	0.28	-0.12	6.14e-11	8891	European	Kettunen (Nat Genet 2012)
rs10889332	1	62950858	MobCH	T	C	0.26	-0.12	3.84e-11	8891	European	Kettunen (Nat Genet 2012)
rs1690761	1	62955862	MobCH	T	C	0.74	0.12	2.52e-11	8891	European	Kettunen (Nat Genet 2012)
rs10889333	1	62957030	MobCH	A	G	0.26	-0.12	9.27e-12	8891	European	Kettunen (Nat Genet 2012)
rs10889334	1	62957199	MobCH	G	C	0.26	-0.12	2.51e-11	8891	European	Kettunen (Nat Genet 2012)
rs10789112	1	62957758	MobCH	C	T	0.26	-0.12	2.47e-11	8891	European	Kettunen (Nat Genet 2012)
rs10889335	1	62960101	MobCH	G	A	0.29	-0.13	7.57e-13	8891	European	Kettunen (Nat Genet 2012)
rs1168041	1	62960250	MobCH	C	T	0.73	0.13	2.28e-12	8891	European	Kettunen (Nat Genet 2012)
rs1168040	1	62960575	MobCH	C	T	0.72	0.12	4.1e-12	8891	European	Kettunen (Nat Genet 2012)
rs1168036	1	62962734	MobCH	G	A	0.74	0.12	1.17e-11	8891	European	Kettunen (Nat Genet 2012)
rs1002687	1	62963737	MobCH	A	G	0.72	0.12	1.32e-12	8891	European	Kettunen (Nat Genet 2012)
rs1168034	1	62963914	MobCH	C	G	0.66	0.12	2.2e-11	8891	European	Kettunen (Nat Genet 2012)
rs35529421	1	62965621	MobCH	A	T	0.29	-0.12	1.32e-12	8891	European	Kettunen (Nat Genet 2012)
rs1168032	1	62967747	MobCH	G	A	0.71	0.12	3.85e-12	8891	European	Kettunen (Nat Genet 2012)
rs1168031	1	62967987	MobCH	T	C	0.72	0.12	1.32e-12	8891	European	Kettunen (Nat Genet 2012)
rs1168030	1	62968491	MobCH	T	C	0.72	0.12	1.32e-12	8891	European	Kettunen (Nat Genet 2012)
rs1168029	1	62969402	MobCH	A	G	0.7	0.13	2.66e-13	8891	European	Kettunen (Nat Genet 2012);Kettunen et al (Nat Genet 2012)
rs1168028	1	62969431	MobCH	A	G	0.69	0.12	4.34e-12	8891	European	Kettunen (Nat Genet 2012)
rs1168027	1	62970184	MobCH	C	T	0.72	0.12	1.32e-12	8891	European	Kettunen (Nat Genet 2012)
rs1168026	1	62970996	MobCH	C	T	0.71	0.12	1.81e-12	8891	European	Kettunen (Nat Genet 2012)
rs1184865	1	62973795	MobCH	G	A	0.72	0.12	1.32e-12	8891	European	Kettunen (Nat Genet 2012)
rs1168042	1	62974150	MobCH	T	A	0.74	0.12	1.17e-11	8891	European	Kettunen (Nat Genet 2012)
rs11207976	1	62976751	MobCH	A	G	0.27	-0.12	1.48e-11	8891	European	Kettunen (Nat Genet 2012)
rs11207977	1	62977307	MobCH	T	C	0.26	-0.12	1.11e-11	8891	European	Kettunen (Nat Genet 2012)
rs1781212	1	62977419	MobCH	A	G	0.72	0.13	2.75e-12	8891	European	Kettunen (Nat Genet 2012)
rs1168044	1	62977558	MobCH	C	A	0.74	0.12	1.17e-11	8891	European	Kettunen (Nat Genet 2012)
chr1:62980161	1	62980161	TC	A	G	0.373	-0.085	7.4e-30	39484	European	van Leeuwen (Nat Comm 2015);Kettunen (Nat Genet 2012)
rs10889336	1	62980410	MobCH	C	T	0.29	-0.12	1.24e-12	8891	European	Kettunen (Nat Genet 2012)
rs10889337	1	62980607	MobCH	A	G	0.29	-0.12	4.66e-12	8891	European	Kettunen (Nat Genet 2012)
chr1:62981440	1	62981440	LDL	G	A	0.373	-0.06	5.4e-17	38663	European	van Leeuwen (Nat Comm 2015);Kettunen (Nat Genet 2012)
rs1168045	1	62982891	XS_VLDL_TG	T	C	0.72	0.12	1.53e-11	8891	European	Kettunen (Nat Genet 2012)
rs11207979	1	62982994	MobCH	A	G	0.26	-0.12	1.12e-11	8891	European	Kettunen (Nat Genet 2012)
rs1168046	1	62983693	MobCH	C	A	0.74	0.12	1.11e-11	8891	European	Kettunen (Nat Genet 2012)
rs1168047	1	62983751	MobCH	T	C	0.74	0.12	1.12e-11	8891	European	Kettunen (Nat Genet 2012)
rs10889338	1	62984897	MobCH	T	C	0.26	-0.12	1.11e-11	8891	European	Kettunen (Nat Genet 2012)
rs1168050	1	62986955	MobCH	T	C	0.74	0.12	1.12e-11	8891	European	Kettunen (Nat Genet 2012)
rs1690766	1	62987289	MobCH	C	T	0.74	0.12	1.12e-11	8891	European	Kettunen (Nat Genet 2012)
rs1781195	1	62988972	MobCH	C	T	0.74	0.12	4.18e-11	8891	European	Kettunen (Nat Genet 2012)
rs1627591	1	62989807	MobCH	T	C	0.74	0.12	1.17e-11	8891	European	Kettunen (Nat Genet 2012)
rs11577840	1	62991369	MobCH	C	T	0.71	0.12	5.54e-12	8891	European	Kettunen (Nat Genet 2012)
rs12062275	1	62991905	MobCH	C	T	0.74	0.12	1.17e-11	8891	European	Kettunen (Nat Genet 2012)
rs11207980	1	62992749	MobCH	C	T	0.26	-0.12	1.11e-11	8891	European	Kettunen (Nat Genet 2012)
rs12403207	1	62993620	MobCH	C	T	0.69	0.12	4.54e-12	8891	European	Kettunen (Nat Genet 2012)
rs1168015	1	62996046	MobCH	G	C	0.74	0.12	1.17e-11	8891	European	Kettunen (Nat Genet 2012)
rs1168013	1	62996838	MobCH	G	C	0.74	0.12	4.08e-11	8891	European	Kettunen (Nat Genet 2012)
rs4915840	1	62999595	MobCH	G	C	0.74	0.12	1.17e-11	8891	European	Kettunen (Nat Genet 2012)
rs7534572	1	62999675	MobCH	G	C	0.74	0.12	1.17e-11	8891	European	Kettunen (Nat Genet 2012)
rs1168018	1	63001120	Gp/Serum_TG	C	A	0.74	-0.12	3.83e-11	8891	European	Kettunen (Nat Genet 2012)
rs1168017	1	63002551	MobCH	G	A	0.72	0.12	4.54e-12	8891	European	Kettunen (Nat Genet 2012)
rs7548877	1	63005950	MobCH	C	T	0.74	0.12	1.17e-11	8891	European	Kettunen (Nat Genet 2012)
rs11207981	1	63006087	MobCH	A	C	0.74	0.12	1.11e-11	8891	European	Kettunen (Nat Genet 2012)
rs1168023	1	63006595	MobCH	T	A	0.74	0.12	1.14e-11	8891	European	Kettunen (Nat Genet 2012)
rs1781221	1	63006842	MobCH	C	A	0.74	0.12	1.2e-11	8891	European	Kettunen (Nat Genet 2012)
rs11207982	1	63007182	MobCH	T	C	0.26	-0.12	1.14e-11	8891	European	Kettunen (Nat Genet 2012)
rs1184547	1	63007228	MobCH	A	G	0.74	0.12	1.19e-11	8891	European	Kettunen (Nat Genet 2012)
rs1168022	1	63007721	MobCH	T	A	0.74	0.12	1.14e-11	8891	European	Kettunen (Nat Genet 2012)
rs1168021	1	63009900	MobCH	G	A	0.74	0.12	1.2e-11	8891	European	Kettunen (Nat Genet 2012)
rs1168020	1	63009956	MobCH	T	C	0.74	0.12	1.2e-11	8891	European	Kettunen (Nat Genet 2012)
rs1179765	1	63010110	MobCH	C	G	0.74	0.12	1.14e-11	8891	European	Kettunen (Nat Genet 2012)
rs12074528	1	63010871	MobCH	C	T	0.74	0.12	1.2e-11	8891	European	Kettunen (Nat Genet 2012)
rs10889339	1	63012056	MobCH	G	A	0.74	0.12	1.2e-11	8891	European	Kettunen (Nat Genet 2012)
rs10889340	1	63012071	MobCH	C	A	0.73	0.12	8.32e-12	8891	European	Kettunen (Nat Genet 2012)
rs11207983	1	63012107	MobCH	T	C	0.74	0.12	1.2e-11	8891	European	Kettunen (Nat Genet 2012)
rs2029763	1	63013134	MobCH	G	A	0.26	-0.12	1.09e-11	8891	European	Kettunen (Nat Genet 2012)
rs11207984	1	63013396	MobCH	T	C	0.74	0.12	1.21e-11	8891	European	Kettunen (Nat Genet 2012)
rs11207985	1	63013786	MobCH	G	A	0.74	0.12	1.22e-11	8891	European	Kettunen (Nat Genet 2012)
rs10789113	1	63015199	MobCH	T	A	0.26	-0.12	1.15e-11	8891	European	Kettunen (Nat Genet 2012)
rs11207986	1	63018170	MobCH	C	T	0.74	0.12	1.21e-11	8891	European	Kettunen (Nat Genet 2012)
rs10159255	1	63020816	MobCH	A	C	0.26	-0.12	1.07e-11	8891	European	Kettunen (Nat Genet 2012)
rs2131925	1	63025942	TC	G	T	0.34	-0.075	4e-80	187000	European	Willer (Nat Genet 2013);Teslovich (Nature 2010);Surakka (Nat Genet 2015);Kettunen (Nat Genet 2012)
rs2131926	1	63026011	MobCH	T	C	0.74	0.12	1.18e-11	8891	European	Kettunen (Nat Genet 2012)
rs10889343	1	63026429	MobCH	G	T	0.74	0.12	1.18e-11	8891	European	Kettunen (Nat Genet 2012)
rs4329540	1	63027024	MobCH	T	C	0.74	0.12	6.76e-12	8891	European	Kettunen (Nat Genet 2012)
rs10889344	1	63033941	MobCH	C	T	0.74	0.12	1.24e-11	8891	European	Kettunen (Nat Genet 2012)
rs10789114	1	63034222	MobCH	C	T	0.26	-0.12	1.24e-11	8891	European	Kettunen (Nat Genet 2012)
rs7555577	1	63034363	XS_VLDL_TG	C	A	0.74	0.12	1.26e-11	8891	European	Kettunen (Nat Genet 2012)
rs12735272	1	63036807	MobCH	A	G	0.74	0.12	1.24e-11	8891	European	Kettunen (Nat Genet 2012)
rs12116574	1	63037837	MobCH	T	C	0.26	-0.12	1.08e-11	8891	European	Kettunen (Nat Genet 2012)
rs6696502	1	63039533	MobCH	T	C	0.73	0.12	5.03e-12	8891	European	Kettunen (Nat Genet 2012)
rs12038768	1	63040728	MobCH	T	G	0.26	-0.12	1.07e-11	8891	European	Kettunen (Nat Genet 2012)
rs11207990	1	63041086	MobCH	C	T	0.74	0.12	1.25e-11	8891	European	Kettunen (Nat Genet 2012)
rs11207992	1	63041800	MobCH	G	T	0.26	-0.12	1.26e-11	8891	European	Kettunen (Nat Genet 2012)
rs1472257	1	63042126	MobCH	G	A	0.74	0.12	1.05e-11	8891	European	Kettunen (Nat Genet 2012)
rs10789116	1	63042738	MobCH	G	A	0.26	-0.12	1.2e-11	8891	European	Kettunen (Nat Genet 2012)
rs1748201	1	63045506	Gp/Serum_TG	C	A	0.73	-0.12	3.85e-11	8891	European	Kettunen (Nat Genet 2012)
rs1748200	1	63046039	MobCH	C	T	0.74	0.12	1.26e-11	8891	European	Kettunen (Nat Genet 2012)
rs1629122	1	63046578	MobCH	A	C	0.74	0.12	1.26e-11	8891	European	Kettunen (Nat Genet 2012)
rs9436224	1	63048275	Gp/Serum_TG	C	A	0.25	0.12	1e-10	8891	European	Kettunen (Nat Genet 2012)
rs34465969	1	63048276	MobCH	C	A	0.25	-0.13	1.77e-11	8891	European	Kettunen (Nat Genet 2012)
rs35194512	1	63048277	Gp/Serum_TG	C	A	0.23	0.13	2.5e-11	8891	European	Kettunen (Nat Genet 2012)
rs11207995	1	63049551	TC	A	C	0.67	0.076	2.4e-34	62095	European	Surakka (Nat Genet 2015);Kettunen (Nat Genet 2012)
rs1748195	1	63049593	MobCH	G	C	0.26	-0.12	4.53e-11	8891	European	Kettunen (Nat Genet 2012);Teslovich (Nature 2010)
rs12042319	1	63049819	MobCH	A	G	0.26	-0.12	1.18e-11	8891	European	Kettunen (Nat Genet 2012)
rs3850634	1	63050598	TC	G	T	0.32	-2.6	4.9e-41	186485	European	Willer (Nat Genet 2013);Surakka (Nat Genet 2015);Kettunen (Nat Genet 2012)
rs11207996	1	63055470	XS_VLDL_TG	A	G	0.28	-0.12	1.32e-11	8891	European	Kettunen (Nat Genet 2012)
rs1748197	1	63056112	MobCH	A	G	0.26	-0.12	1.28e-11	8891	European	Kettunen (Nat Genet 2012)
rs2366636	1	63056670	MobCH	A	G	0.26	-0.12	1.28e-11	8891	European	Kettunen (Nat Genet 2012)
rs1748199	1	63057136	MobCH	C	T	0.26	-0.12	1.13e-11	8891	European	Kettunen (Nat Genet 2012)
rs6690733	1	63060311	MobCH	C	A	0.26	-0.12	4.49e-11	8891	European	Kettunen (Nat Genet 2012)
rs11207997	1	63061906	MobCH	T	C	0.27	-0.12	4.35e-11	8891	European	Kettunen (Nat Genet 2012)
rs10789117	1	63072265	MobCH	C	A	0.26	-0.12	4.44e-11	8891	European	Kettunen (Nat Genet 2012)
rs6675401	1	63073975	MobCH	T	C	0.26	-0.12	4.44e-11	8891	European	Kettunen (Nat Genet 2012)
rs6678483	1	63074442	MobCH	A	C	0.26	-0.12	4.45e-11	8891	European	Kettunen (Nat Genet 2012)
rs10889347	1	63075826	MobCH	A	G	0.26	-0.12	4.59e-11	8891	European	Kettunen (Nat Genet 2012)
rs10889348	1	63078222	MobCH	T	A	0.25	-0.13	1.33e-12	8891	European	Kettunen (Nat Genet 2012);Surakka (Nat Genet 2015)
rs10889349	1	63081919	MobCH	G	A	0.26	-0.12	1.3e-11	8891	European	Kettunen (Nat Genet 2012)
rs61471917	1	63084030	MobCH	A	G	0.26	-0.12	1.3e-11	8891	European	Kettunen (Nat Genet 2012)
rs10889350	1	63085266	MobCH	T	C	0.26	-0.12	1.29e-11	8891	European	Kettunen (Nat Genet 2012)
rs12239736	1	63085997	MobCH	A	T	0.16	-0.15	1.29e-10	8891	European	Kettunen (Nat Genet 2012)
rs6587980	1	63090858	MobCH	T	C	0.26	-0.12	4.73e-11	8891	European	Kettunen (Nat Genet 2012)
rs10157265	1	63093617	MobCH	T	C	0.26	-0.12	1.27e-11	8891	European	Kettunen (Nat Genet 2012)
rs11485618	1	63094207	MobCH	G	A	0.26	-0.12	1.2e-11	8891	European	Kettunen (Nat Genet 2012)
rs10789118	1	63094692	MobCH	G	A	0.26	-0.12	1.2e-11	8891	European	Kettunen (Nat Genet 2012);van Leeuwen (Nat Comm 2015)
rs7520810	1	63095711	MobCH	T	C	0.26	-0.12	1.2e-11	8891	European	Kettunen (Nat Genet 2012)
rs10789119	1	63098235	MobCH	A	G	0.26	-0.12	1.14e-11	8891	European	Kettunen (Nat Genet 2012)
rs10889352	1	63099023	MobCH	C	T	0.26	-0.12	1.19e-11	8891	European	Kettunen (Nat Genet 2012)
rs2366638	1	63099577	MobCH	A	G	0.26	-0.12	1.25e-11	8891	European	Kettunen (Nat Genet 2012)
rs1570694	1	63103217	MobCH	G	A	0.26	-0.12	1.11e-11	8891	European	Kettunen (Nat Genet 2012)
rs12047226	1	63105538	MobCH	C	T	0.26	-0.12	1.16e-11	8891	European	Kettunen (Nat Genet 2012)
rs7539035	1	63106767	MobCH	A	C	0.26	-0.12	4.55e-11	8891	European	Kettunen (Nat Genet 2012)
rs995000	1	63107526	MobCH	T	C	0.26	-0.12	1.13e-11	8891	European	Kettunen (Nat Genet 2012)
rs11208000	1	63108374	MobCH	G	A	0.26	-0.12	3.58e-11	8891	European	Kettunen (Nat Genet 2012)
rs993013	1	63111069	XS_VLDL_TG	T	G	0.7	0.12	2.52e-11	8891	European	Kettunen (Nat Genet 2012)
rs1168085	1	63112320	MobCH	G	C	0.74	0.12	1.2e-11	8891	European	Kettunen (Nat Genet 2012)
rs1168086	1	63112389	MobCH	G	A	0.74	0.12	1.2e-11	8891	European	Kettunen (Nat Genet 2012)
rs746735	1	63113511	MobCH	A	C	0.74	0.12	1.2e-11	8891	European	Kettunen (Nat Genet 2012)
rs1168089	1	63113719	MobCH	C	T	0.74	0.12	4.55e-11	8891	European	Kettunen (Nat Genet 2012)
rs10889353	1	63118196	TC	C	A	0.32	-0.079	3.7e-12	94000	European	Willer (Nat Genet 2013);Teslovich (Nature 2010);Kettunen (Nat Genet 2012)
rs1168097	1	63120371	MobCH	T	C	0.74	0.12	1.17e-11	8891	European	Kettunen (Nat Genet 2012)
rs1168098	1	63121294	MobCH	A	G	0.74	0.12	1.17e-11	8891	European	Kettunen (Nat Genet 2012)
rs1168099	1	63122859	MobCH	A	C	0.74	0.12	4.12e-11	8891	European	Kettunen (Nat Genet 2012)
rs4495740	1	63124465	XS_VLDL_TG	G	T	0.28	-0.12	1.26e-11	8891	European	Kettunen (Nat Genet 2012)
rs1168102	1	63127705	XS_VLDL_TG	T	C	0.71	0.12	4.42e-11	8891	European	Kettunen (Nat Genet 2012)
rs28641195	1	63128081	MobCH	T	C	0.74	0.12	1.2e-11	8891	European	Kettunen (Nat Genet 2012)
rs10889354	1	63129082	MobCH	C	T	0.27	-0.12	1.2e-11	8891	European	Kettunen (Nat Genet 2012)
rs11208001	1	63130431	MobCH	T	C	0.26	-0.12	2.81e-11	8891	European	Kettunen (Nat Genet 2012)
rs2479464	1	63130991	MobCH	A	G	0.73	0.12	1.21e-11	8891	European	Kettunen (Nat Genet 2012)
rs1168132	1	63133468	MobCH	A	T	0.73	0.12	1.24e-11	8891	European	Kettunen (Nat Genet 2012)
rs4587594	1	63133930	MobCH	A	G	0.26	-0.12	1.08e-11	8891	European	Kettunen (Nat Genet 2012)
rs1168124	1	63139730	MobCH	T	C	0.73	0.12	1.35e-11	8891	European	Kettunen (Nat Genet 2012)
rs11208004	1	63145439	MobCH	A	G	0.26	-0.12	8.91e-12	8891	European	Kettunen (Nat Genet 2012)
rs10889356	1	63155349	XS_VLDL_TG	A	G	0.3	-0.12	1.87e-10	8891	European	Kettunen (Nat Genet 2012)
rs1168114	1	63156043	MobCH	G	A	0.75	0.12	4.39e-11	8891	European	Kettunen (Nat Genet 2012)
rs12136083	1	63163073	MobCH	C	T	0.25	-0.12	4.59e-11	8891	European	Kettunen (Nat Genet 2012)
rs7518497	1	63177696	MobCH	C	A	0.25	-0.12	4.79e-11	8891	European	Kettunen (Nat Genet 2012)
rs12130333	1	63191777	TG	T	C	0.22	-0.11	2e-08	17146	European	Willer (Nat Genet 2008)
rs11164654	1	92968312	TC	C	T	0.79	0.044	1.3e-09	62130	European	Surakka (Nat Genet 2015)
rs7515577	1	93009438	TC	A	C	0.8	0.042	4.2e-09	62146	European	Surakka (Nat Genet 2015);Waterworth (Arterioscler Thromb Vasc Biol 2010)
rs531514	1	93700212	HDL_C	T	C	N.R.	+	7.5e-09	19840	European	Kathiresan (Nat Genet 2009)
chr1:109783570	1	109783570	LDL	T	A	0.418	-0.174	2.4e-27	38859	European	van Leeuwen (Nat Comm 2015)
chr1:109784938	1	109784938	LDL	C	T	0.454	0.167	7.3e-26	39626	European	van Leeuwen (Nat Comm 2015)
chr1:109788453	1	109788453	LDL	T	A	0.5	-0.354	1.4e-71	39407	European	van Leeuwen (Nat Comm 2015)
rs6657811	1	109807283	HDL_C	T	A	0.12	0.057	1.9e-09	60775	European	Surakka (Nat Genet 2015)
rs41279714	1	109813485	Gp/TC	T	C	0.11	0.2	1.42e-11	8891	European	Kettunen (Nat Genet 2012)
rs4970834	1	109814880	LDL_C	T	C	0.19	-0.04	3e-11	90280	European	Teslovich (Nature 2010)
rs7528419	1	109817192	M_LDL_C/M_LDL_PL	G	A	0.21	-0.13	5.47e-12	8891	European	Kettunen (Nat Genet 2012)
rs12740374	1	109817590	LDL_C	T	G	0.21	-0.23	2e-42	186903	European	Willer (Nat Genet 2013);Kettunen (Nat Genet 2012)
rs660240	1	109817838	LDL_C	A	G	0.21	-0.044	1.2e-26	178000	European	Willer (Nat Genet 2013);Teslovich (Nature 2010);Kathiresan (Nat Genet 2009);Willer (Nat Genet 2008); Middelberg (BMC Med Genet 2011); Sabatti (Nat Genet 2009);Kettunen (Nat Genet 2012)
rs629301	1	109818306	LDL_C	G	T	0.24	-0.167	5e-241	187289	European	Willer (Nat Genet 2013);Surakka (Nat Genet 2015);Kettunen (Nat Genet 2012);Teslovich (Nature 2010);Aulchenko (Nat Genet 2009)
rs646776	1	109818530	LDL_C	T	C	0.22	0.146	2e-91	58358	European	Surakka (Nat Genet 2015);van Leeuwen (Nat Comm 2015);Willer (Nat Genet 2013);Kathiresan (Nat Genet 2008);Willer (Nat Genet 2008);Kettunen (Nat Genet 2012)
rs583104	1	109821307	M_LDL_C/M_LDL_PL	T	G	0.77	0.14	8.63e-12	8891	European	Kettunen (Nat Genet 2012);Sanna (PLoS Genet 2011)
rs602633	1	109821511	LDL_C	G	T	0.8	6.09	4.8e-14	98588	European	Teslovich (Nature 2010);Kettunen (Nat Genet 2012)
rs1277930	1	109822143	M_LDL_C/M_LDL_PL	A	G	0.77	0.14	9.24e-12	8891	European	Kettunen (Nat Genet 2012)
rs599839	1	109822166	LDL_C	A	G	0.77	5.67	3.61e-36	21986	European	Dumitrescu (PLoS Genet 2011);Willer (Nat Genet 2013);Teslovich (Nature 2010);Kettunen (Nat Genet 2012)
rs35358959	1	109824250	Gp/TC	A	G	0.11	0.18	1.25e-10	8891	European	Kettunen (Nat Genet 2012)
chr1:109950441	1	109950441	LDL	A	T	0.08	-0.131	9.5e-14	36139	European	van Leeuwen (Nat Comm 2015)
rs267733	1	150958836	LDL_C	G	A	0.16	-0.033	5e-09	21312	European	Kathiresan (Nat Genet 2008);Willer (Nat Genet 2008)
rs12145743	1	156700651	HDL_C	G	T	0.34	0.02	2e-08	16058	European	Waterworth (Arterioscler Thromb Vasc Biol 2010)
1-159807481	1	161540857	XL_HDL_CE	A	T	0.11	0.19	1.21e-10	8891	European	Kettunen (Nat Genet 2012)
rs4650994	1	178515312	HDL_C	G	A	0.49	0.021	7e-09	19983	European	Willer (Nat Genet 2008)
rs2489279	1	182144119	HDL_C	C	G	0.69	0.038	3.7e-09	60732	European	Surakka (Nat Genet 2015)
rs1689800	1	182168885	HDL_C	G	A	0.35	-0.034	5e-20	173000	European	Willer (Nat Genet 2013);Surakka (Nat Genet 2015)
rs340839	1	214161820	TG	A	G	0.47	0.039	4.4e-10	54836	European	Surakka (Nat Genet 2015)
rs2807834	1	220970593	TC	T	G	0.32	-1.38	4.9e-13	96598	European	Teslovich (Nature 2010);Surakka (Nat Genet 2015)
rs2642442	1	220973563	TC	C	T	0.33	-0.035	3e-11	90193	European	Teslovich (Nature 2010);Willer (Nat Genet 2013);Teslovich (Nature 2010)
rs1874124	1	220975337	TC	C	T	0.86	0.054	4.7e-10	62091	European	Surakka (Nat Genet 2015)
rs2144300	1	230294916	HDL_C	T	C	0.4	1.11	2.6e-14	99900	European	Teslovich (Nature 2010)
rs4846914	1	230295691	HDL_C	G	A	0.41	-0.048	4e-41	186749	European	Willer (Nat Genet 2013);Teslovich (Nature 2010);Surakka (Nat Genet 2015);Tukiainen (Hum Molec Genet 2012)
chr1:230296153	1	230296153	HDL_C	C	T	0.424	-0.02	5.1e-10	34236	European	van Leeuwen (Nat Comm 2015)
rs10864728	1	230304914	TG	A	G	0.39	0.052	4.5e-16	54877	European	Surakka (Nat Genet 2015)
rs10489615	1	230304988	HDL_C	G	A	0.6	0.018	3.8e-09	21412	European	Aulchenko (Nat Genet 2009)
rs1321257	1	230305312	TG	G	A	0.39	0.052	4.8e-16	54878	European	Surakka (Nat Genet 2015);Teslovich (Nature 2010)
rs4846922	1	230307182	HDL_C	T	C	0.39	-0.08	4e-08	11616	European	Kristiansson (Circ Cardiovasc Genet 2012)
rs4846923	1	230307222	HDL_C	G	T	0.71	0.055	1.4e-16	60717	European	Surakka (Nat Genet 2015)
chr1:234849339	1	234849339	TC	G	A	0.479	-0.055	4.6e-14	39084	European	van Leeuwen (Nat Comm 2015)
rs557933	1	234853268	TC	C	A	0.54	0.049	2e-16	62036	European	Surakka (Nat Genet 2015)
rs514230	1	234858597	TC	T	A	0.54	0.048	1.1e-15	62030	European	Surakka (Nat Genet 2015);Teslovich (Nature 2010)
chr2:21014883	2	21014883	TC	C	T	0.024	-0.211	7.6e-10	30523	European	van Leeuwen (Nat Comm 2015)
2-20984945	2	21121464	XS_VLDL_TG	C	T	0.29	-0.13	6.84e-14	8891	European	Kettunen (Nat Genet 2012)
rs6711016	2	21123352	XS_VLDL_TG	A	C	0.29	-0.13	5.16e-14	8891	European	Kettunen (Nat Genet 2012);Kristiansson (Circ Cardiovasc Genet 2012)
rs56296027	2	21134011	XS_VLDL_TG	C	T	0.28	-0.14	4.67e-15	8891	European	Kettunen (Nat Genet 2012)
rs4296389	2	21142994	XS_VLDL_TG	T	C	0.33	-0.12	9.13e-13	8891	European	Kettunen (Nat Genet 2012)
rs4426495	2	21143982	XS_VLDL_TG	T	C	0.38	-0.11	3.65e-11	8891	European	Kettunen (Nat Genet 2012)
rs10180633	2	21144829	XS_VLDL_TG	T	G	0.38	-0.11	3.49e-11	8891	European	Kettunen (Nat Genet 2012)
rs10183548	2	21145499	XS_VLDL_TG	A	G	0.38	-0.11	4.55e-11	8891	European	Kettunen (Nat Genet 2012)
rs6732011	2	21146521	XS_VLDL_TG	T	G	0.38	-0.11	3.45e-11	8891	European	Kettunen (Nat Genet 2012)
rs3923037	2	21148274	XS_VLDL_TG	C	A	0.38	-0.11	5.73e-11	8891	European	Kettunen (Nat Genet 2012)
chr2:21152755	2	21152755	LDL	A	G	0.043	-0.177	1.1e-24	32511	European	van Leeuwen (Nat Comm 2015)
chr2:21183334	2	21183334	LDL	C	A	0.058	0.144	2e-11	32156	European	van Leeuwen (Nat Comm 2015)
rs7604788	2	21190024	IDL_TG	C	T	0.93	0.26	1.79e-11	8891	European	Kettunen (Nat Genet 2012)
rs6728178	2	21193946	XS_VLDL_TG	G	A	0.72	0.15	4.94e-17	8891	European	Kettunen (Nat Genet 2012)
rs11902417	2	21198900	XS_VLDL_TG	G	A	0.72	0.15	4.69e-17	8891	European	Kettunen (Nat Genet 2012)
chr2:21202959	2	21202959	LDL	A	C	0.278	0.234	1.7e-35	38143	European	van Leeuwen (Nat Comm 2015)
rs10184054	2	21203877	XS_VLDL_TG	C	G	0.72	0.15	4.43e-17	8891	European	Kettunen (Nat Genet 2012)
rs6544366	2	21204025	XS_VLDL_TG	G	T	0.72	0.15	4.63e-17	8891	European	Kettunen (Nat Genet 2012)
rs4564803	2	21205502	XS_VLDL_TG	G	T	0.72	0.15	4.33e-17	8891	European	Kettunen (Nat Genet 2012)
rs6754295	2	21206183	XS_VLDL_TG	T	G	0.72	0.15	3.75e-17	8891	European	Kettunen (Nat Genet 2012);Willer (Nat Genet 2008)
rs7557067	2	21208211	XS_VLDL_TG	A	G	0.72	0.15	4.29e-17	8891	European	Kettunen (Nat Genet 2012);Teslovich (Nature 2010)
chr2:21213193	2	21213193	LDL	T	C	0.291	0.327	1.8e-57	37392	European	van Leeuwen (Nat Comm 2015)
chr2:21216815	2	21216815	LDL	A	C	0.36	0.137	1.1e-31	37512	European	van Leeuwen (Nat Comm 2015);Kettunen (Nat Genet 2012)
chr2:21217490	2	21217490	LDL	T	C	0.52	-0.476	1.4e-142	39156	European	van Leeuwen (Nat Comm 2015);Kettunen (Nat Genet 2012)
rs4665710	2	21221035	TG	C	A	0.76	0.082	1.1e-31	59888	European	Surakka (Nat Genet 2015);Kettunen (Nat Genet 2012)
rs952275	2	21221399	XS_VLDL_PL	G	T	0.41	0.12	3.59e-14	8891	European	Kettunen (Nat Genet 2012)
rs1042034	2	21225281	TG	C	T	0.22	-5.99	1.4e-45	187000	European	Willer (Nat Genet 2013);Teslovich (Nature 2010);Surakka (Nat Genet 2015);Tukiainen (Hum Molec Genet 2012);Kettunen (Nat Genet 2012)
rs2678379	2	21226560	HDL_C	A	G	0.24	0.065	7.2e-21	60676	European	Surakka (Nat Genet 2015);van Leeuwen (Nat Comm 2015);Kettunen (Nat Genet 2012)
rs676210	2	21231524	XS_VLDL_TG	A	G	0.27	-0.15	7.33e-17	8891	European	Kettunen (Nat Genet 2012)
rs693	2	21232195	TC	G	A	0.52	-0.096	8.7e-23	177000	European	Willer (Nat Genet 2013);Teslovich (Nature 2010);Dumitrescu (PLoS Genet 2011);Teslovich (Nature 2010); Waterworth (Arterioscler Thromb Vasc Biol 2010);Kettunen (Nat Genet 2012)
rs1041968	2	21232804	TC	A	G	0.48	0.095	4.6e-54	56953	European	Surakka (Nat Genet 2015);Kettunen (Nat Genet 2012)
rs673548	2	21237544	XS_VLDL_TG	A	G	0.27	-0.15	3.27e-17	8891	European	Kettunen (Nat Genet 2012);Aulchenko (Nat Genet 2009)
rs11680233	2	21240031	XS_VLDL_TG	C	A	0.66	0.12	3.71e-12	8891	European	Kettunen (Nat Genet 2012)
rs11126598	2	21240364	XS_VLDL_TG	G	A	0.66	0.12	3.23e-12	8891	European	Kettunen (Nat Genet 2012)
rs12713956	2	21241505	LDL_C	G	A	0.183	-4.86	3.74e-08	7861	African-American	Coram (Am J Hum Gen 2013)
chr2:21244000	2	21244000	LDL	T	G	0.474	0.269	9.5e-51	38190	European	van Leeuwen (Nat Comm 2015);Teslovich (Nature 2010);Kettunen (Nat Genet 2012)
rs3791980	2	21245329	XS_VLDL_TG	T	G	0.59	0.12	5.66e-11	8891	European	Kettunen (Nat Genet 2012)
chr2:21250914	2	21250914	LDL	A	G	0.45	0.113	4.3e-16	36837	European	van Leeuwen (Nat Comm 2015)
rs1469513	2	21259562	XS_VLDL_PL	C	T	0.35	0.11	5.89e-11	8891	European	Kettunen (Nat Genet 2012)
rs1367117	2	21263900	LDL_C	A	G	0.32	0.119	1e-182	187218	European	Willer (Nat Genet 2013);Surakka (Nat Genet 2015)
rs515135	2	21286057	LDL_C	C	T	0.83	0.135	2.3e-63	58264	European	Surakka (Nat Genet 2015);Willer (Nat Genet 2013);Teslovich (Nature 2010)
rs562338	2	21288321	LDL_C	T	C	0.19	-5.52	1.05e-33	21986	European	Dumitrescu (PLoS Genet 2011);Willer (Nat Genet 2013)
chr2:21291529	2	21291529	TC	G	A	0.138	-0.099	2.9e-23	38227	European	van Leeuwen (Nat Comm 2015);Kim (Nat Genet 2011)
rs568938	2	21303616	LDL_C	T	C	0.426	0.109	1.1e-08	6832	African-American	Wu (PLoS Genet 2013)
rs754523	2	21311691	LDL_C	T	C	0.68	-3.64	3.44e-19	21986	European	Dumitrescu (PLoS Genet 2011);Teslovich (Nature 2010)
rs547235	2	21384682	LDL_C	A	G	0.187	-0.144	1.69e-09	5524	European	Sanna (PLoS Genet 2011)
rs4665972	2	27598097	MobCH2	C	T	0.64	-0.13	2.63e-13	8891	European	Kettunen (Nat Genet 2012);Coram (Am J Hum Gen 2013)
rs1260326	2	27730940	TG	T	C	0.39	0.115	2e-239	187287	European	Willer (Nat Genet 2013);Surakka (Nat Genet 2015);van Leeuwen (Nat Comm 2015);Kettunen (Nat Genet 2012);Weissglas-Volkov (J Med Gen 2013)
rs6547692	2	27734972	Tot_TG	A	G	0.53	-0.11	2.21e-11	8891	European	Kettunen (Nat Genet 2012)
rs780096	2	27741072	Tot_TG	G	C	0.6	-0.12	8.19e-13	8891	European	Kettunen (Nat Genet 2012)
rs780095	2	27741105	Tot_TG	G	A	0.6	-0.12	8.24e-13	8891	European	Kettunen (Nat Genet 2012)
rs780094	2	27741237	TG	A	G	0.4	0.06	1.69e-32	24258	European	Dumitrescu (PLoS Genet 2011);Willer (Nat Genet 2013);Teslovich (Nature 2010);Kettunen (Nat Genet 2012);Coram (Am J Hum Gen 2013)
rs780093	2	27742603	M_VLDL_TG	C	T	0.64	-0.13	8.79e-16	8891	European	Kettunen (Nat Genet 2012);Kraja (Diabetes 2011)
rs780092	2	27743154	TG	G	A	0.33	-0.05	4.6e-27	180000	European	Willer (Nat Genet 2013);Teslovich (Nature 2010)
rs1260334	2	27748597	Tot_TG	A	C	0.6	-0.12	1.21e-12	8891	European	Kettunen (Nat Genet 2012)
rs1260333	2	27748624	TG	C	T	0.55	-0.054	1.7e-19	173000	European	Willer (Nat Genet 2013);Teslovich (Nature 2010);Kettunen (Nat Genet 2012)
rs1313566	2	27748904	Tot_TG	A	G	0.6	-0.12	1.2e-12	8891	European	Kettunen (Nat Genet 2012)
rs2950835	2	27750545	M_VLDL_TG	G	A	0.6	-0.11	3.78e-12	8891	European	Kettunen (Nat Genet 2012)
rs2911711	2	27750546	Tot_TG	A	T	0.59	-0.12	5.05e-12	8891	European	Kettunen (Nat Genet 2012)
chr2:27752463	2	27752463	TG	G	A	0.353	0.033	9.3e-36	34870	European	van Leeuwen (Nat Comm 2015)
rs6753534	2	27752871	Tot_TG	T	C	0.6	-0.12	2.99e-13	8891	European	Kettunen (Nat Genet 2012)
rs4665987	2	27755825	M_VLDL_TG	A	G	0.29	0.12	3.48e-12	8891	European	Kettunen (Nat Genet 2012)
rs12473139	2	27765587	M_VLDL_TG	C	T	0.29	0.12	3.38e-12	8891	European	Kettunen (Nat Genet 2012)
rs4665991	2	27766284	M_VLDL_TG	A	G	0.29	0.12	2.83e-12	8891	European	Kettunen (Nat Genet 2012)
rs12995461	2	27778167	M_VLDL_TG	C	A	0.29	0.12	3.41e-12	8891	European	Kettunen (Nat Genet 2012)
rs10169065	2	27778560	M_VLDL_TG	G	A	0.28	0.13	3.24e-12	8891	European	Kettunen (Nat Genet 2012)
rs10179872	2	27778572	M_VLDL_TG	A	G	0.28	0.13	3.24e-12	8891	European	Kettunen (Nat Genet 2012)
rs4665382	2	27783801	M_VLDL_TG	C	T	0.29	0.12	3.28e-12	8891	European	Kettunen (Nat Genet 2012)
rs7570476	2	27784658	M_VLDL_TG	T	C	0.29	0.12	3.43e-12	8891	European	Kettunen (Nat Genet 2012)
rs10208529	2	27786188	M_VLDL_TG	T	A	0.26	0.13	2.54e-12	8891	European	Kettunen (Nat Genet 2012)
rs4665383	2	27791555	M_VLDL_TG	G	C	0.28	0.12	3.48e-12	8891	European	Kettunen (Nat Genet 2012)
rs7577311	2	27793921	M_VLDL_TG	T	G	0.29	0.12	3.46e-12	8891	European	Kettunen (Nat Genet 2012)
rs1919127	2	27801493	M_VLDL_TG	C	T	0.29	0.12	4.57e-12	8891	European	Kettunen (Nat Genet 2012)
rs1919128	2	27801759	M_VLDL_TG	G	A	0.29	0.12	3.67e-12	8891	European	Kettunen (Nat Genet 2012)
rs12478841	2	27811722	M_VLDL_TG	G	A	0.29	0.12	3.46e-12	8891	European	Kettunen (Nat Genet 2012)
rs6760250	2	27812252	M_VLDL_TG	A	G	0.29	0.12	3.55e-12	8891	European	Kettunen (Nat Genet 2012)
rs13022873	2	27815510	M_VLDL_TG	C	A	0.29	0.12	3.16e-12	8891	European	Kettunen (Nat Genet 2012)
rs12467476	2	27825715	M_VLDL_TG	C	T	0.29	0.12	3.55e-12	8891	European	Kettunen (Nat Genet 2012)
rs12464616	2	27827092	M_VLDL_TG	T	C	0.29	0.12	3.56e-12	8891	European	Kettunen (Nat Genet 2012)
rs2384656	2	27832055	M_VLDL_TG	G	A	0.28	0.12	6.11e-12	8891	European	Kettunen (Nat Genet 2012)
2-27687006	2	27833502	M_VLDL_TG	C	T	0.29	0.12	3.59e-12	8891	European	Kettunen (Nat Genet 2012)
rs12987055	2	27834152	M_VLDL_TG	C	T	0.29	0.12	3.61e-12	8891	European	Kettunen (Nat Genet 2012)
rs13020949	2	27836605	M_VLDL_TG	T	C	0.29	0.12	3.29e-12	8891	European	Kettunen (Nat Genet 2012)
rs4666000	2	27839369	M_VLDL_TG	C	T	0.31	0.11	5.77e-11	8891	European	Kettunen (Nat Genet 2012)
rs2068834	2	27839539	M_VLDL_TG	C	T	0.31	0.11	5.2e-11	8891	European	Kettunen (Nat Genet 2012)
rs4666002	2	27840640	M_VLDL_TG	C	G	0.29	0.12	3.97e-12	8891	European	Kettunen (Nat Genet 2012)
rs3749147	2	27851918	M_VLDL_TG	A	G	0.28	0.13	2.35e-12	8891	European	Kettunen (Nat Genet 2012)
rs13002853	2	27853245	M_VLDL_TG	G	C	0.28	0.12	2.54e-12	8891	European	Kettunen (Nat Genet 2012)
rs34502053	2	27854524	M_VLDL_TG	A	G	0.28	0.13	1.88e-12	8891	European	Kettunen (Nat Genet 2012)
chr2:44063098	2	44063098	LDL	C	G	0.056	-0.093	4.9e-11	35726	European	van Leeuwen (Nat Comm 2015)
rs6756629	2	44065090	TC	A	G	0.064	-10	9.3e-13	10309	European	Holmen (Nat Genet 2014);Teslovich (Nature 2010);Kathiresan (Nat Genet 2009)
rs11887534	2	44066247	TC	C	G	0.064	-10	5.7e-13	10309	European	Holmen (Nat Genet 2014)
rs4299376	2	44072576	TC	G	T	0.31	0.079	3e-73	187000	European	Willer (Nat Genet 2013);Teslovich (Nature 2010);Surakka (Nat Genet 2015);van Leeuwen (Nat Comm 2015)
rs6544713	2	44073881	LDL_C	T	C	0.32	0.15	2e-20	173000	European	Willer (Nat Genet 2013);Dumitrescu (PLoS Genet 2011)
rs4953023	2	44074000	LDL_C	A	G	N.R.	-	1.1e-23	178000	European	Willer (Nat Genet 2013);Teslovich (Nature 2010)
rs4245791	2	44074431	LDL_C	G	A	0.143	5.97	1.24e-09	7861	African-American	Coram (Am J Hum Gen 2013)
rs76866386	2	44075483	TC	T	C	0.93	0.139	5.6e-33	62076	European	Surakka (Nat Genet 2015)
rs72875462	2	44079310	LDL_C	C	A	0.93	0.148	2.1e-35	58307	European	Surakka (Nat Genet 2015)
rs2710642	2	63149557	LDL_C	G	A	0.35	-0.024	6e-09	21312	European	Kathiresan (Nat Genet 2008)
rs2540948	2	65284623	TG	C	T	0.35	-0.036	6.6e-09	59939	European	Surakka (Nat Genet 2015)
rs10490626	2	118835841	LDL_C	A	G	0.08	-0.051	2e-12	95367	European	Teslovich (Nature 2010);Kathiresan (Nat Genet 2008);Willer (Nat Genet 2008)
rs2030746	2	121309488	LDL_C	T	C	0.4	0.021	9e-09	19794	European	Kathiresan (Nat Genet 2009);Willer (Nat Genet 2008); Middelberg (BMC Med Genet 2011);Kristiansson (Circ Cardiovasc Genet 2012)
rs7570971	2	135837906	TC	A	C	0.35	0.03	1e-13	97559	European	Teslovich (Nature 2010)
rs10445686	2	135893372	LDL_C	A	G	N.R.	-	3.8e-08	11616	European	Kristiansson (Circ Cardiovasc Genet 2012)
rs6759321	2	136322676	TC	T	G	0.31	1.18	1e-08	19793	European	Kathiresan (Nat Genet 2009);Willer (Nat Genet 2008);Surakka (Nat Genet 2015)
rs28453840	2	136522941	TC	G	A	0.21	0.046	2.9e-09	56912	European	Surakka (Nat Genet 2015)
rs10195252	2	165513091	TG	C	T	0.4	-2.01	1.6e-10	74315	European	Teslovich (Nature 2010)
rs12328675	2	165540800	HDL_C	C	T	0.13	0.045	2e-15	145000	European	Willer (Nat Genet 2013);Teslovich (Nature 2010)
rs2287623	2	169830155	TC	G	A	0.41	0.027	4e-12	94000	European	Willer (Nat Genet 2013);Teslovich (Nature 2010)
rs11694172	2	203532304	TC	G	A	0.25	0.028	2e-09	22562	European	Aulchenko (Nat Genet 2009);Surakka (Nat Genet 2015)
rs115400054	2	203676105	TC	C	T	0.88	0.054	5.4e-09	62090	European	Surakka (Nat Genet 2015)
rs140244541	2	203808532	LDL_C	G	A	0.86	0.05	5.5e-09	58324	European	Surakka (Nat Genet 2015)
rs1047891	2	211540507	HDL_C	A	C	0.33	-0.027	9e-10	26178	EastAsian	Kim (Nat Genet 2011)
rs1250229	2	216304384	LDL_C	T	C	0.27	-0.024	3e-08	12545	EastAsian	Kim (Nat Genet 2011)
rs78058190	2	219699999	HDL_C	A	G	0.05	-0.141	5.7e-12	52934	European	Surakka (Nat Genet 2015)
rs2943645	2	227099180	TG	C	T	0.37	-1.89	2.4e-08	15673	European	Willer (Nat Genet 2008);Surakka (Nat Genet 2015)
rs2972146	2	227100698	HDL_C	G	T	0.37	0.032	2e-17	170000	European	Willer (Nat Genet 2013)
chr2:227125254	2	227125254	HDL_C	G	A	0.363	0.017	1.2e-08	39442	European	van Leeuwen (Nat Comm 2015)
rs1515100	2	227128917	HDL_C	C	A	0.38	0.037	1.2e-09	60717	European	Surakka (Nat Genet 2015);Aulchenko (Nat Genet 2009)
rs2713536	2	227163642	HDL_C	C	T	0.38	0.038	3.4e-10	60709	European	Surakka (Nat Genet 2015)
rs11563251	2	234679384	TC	T	C	0.12	0.037	1e-09	25098	EastAsian	Kim (Nat Genet 2011);Willer (Nat Genet 2008)
rs2606736	3	11400249	HDL_C	C	T	0.38	0.034	3.7e-08	60624	European	Surakka (Nat Genet 2015);Zabaneh (PLoS One 2010)
rs7635838	3	11412604	HDL_C	T	C	0.39	0.037	1.9e-09	60624	European	Surakka (Nat Genet 2015)
rs2920503	3	12324230	LDL_C	T	C	0.3	0.041	2.9e-10	58252	European	Surakka (Nat Genet 2015)
rs1699337	3	12450093	TC	G	A	0.65	0.043	9.3e-12	62013	European	Surakka (Nat Genet 2015)
rs2290159	3	12628920	TC	C	G	0.23	-0.037	2e-09	22562	European	Aulchenko (Nat Genet 2009);Surakka (Nat Genet 2015)
rs7640978	3	32533010	LDL_C	T	C	0.09	-0.039	1e-08	19785	European	Kathiresan (Nat Genet 2009); Aulchenko (Nat Genet 2009);Waterworth (Arterioscler Thromb Vasc Biol 2010)
rs2290547	3	47061183	HDL_C	A	G	0.196	-0.03	4e-09	21312	European	Kathiresan (Nat Genet 2008)
rs2013208	3	50129399	HDL_C	T	C	0.5	0.025	9e-12	93223	European	Teslovich (Nature 2010);Kathiresan (Nat Genet 2009);Willer (Nat Genet 2008); Waterworth (Arterioscler Thromb Vasc Biol 2010)
rs13326165	3	52532118	HDL_C	A	G	0.21	0.029	9e-11	84000	European	Willer (Nat Genet 2013);Teslovich (Nature 2010)
rs13315871	3	58381287	TC	A	G	0.1	-0.036	4e-08	11576	European	Middelberg (BMC Med Genet 2011)
rs6805251	3	119560606	HDL_C	T	C	0.39	0.02	1e-08	19648	European	Kathiresan (Nat Genet 2009)
rs17404153	3	132163200	LDL_C	T	G	0.145	-0.034	2e-09	22562	European	Aulchenko (Nat Genet 2009); Middelberg (BMC Med Genet 2011); Sandhu (Lancet 2008);Kathiresan (Nat Genet 2008)
rs34894639	3	135798658	TG	C	T	0.78	0.042	7.6e-09	59969	European	Surakka (Nat Genet 2015)
rs645040	3	135926622	TG	G	T	0.23	-0.029	2e-12	95242	European	Teslovich (Nature 2010);Surakka (Nat Genet 2015)
rs483465	3	136047977	HDL_C	A	G	0.21	0.045	3.7e-10	60775	European	Surakka (Nat Genet 2015)
rs6818397	4	3434885	TC	T	G	0.36	0.028	2e-05	56720	European	Surakka (Nat Genet 2015)
rs59950280	4	3452345	TG	A	G	0.31	0.044	1.1e-10	59686	European	Surakka (Nat Genet 2015)
rs6831256	4	3473139	TG	G	A	0.42	0.026	2e-12	95070	European	Teslovich (Nature 2010);Willer (Nat Genet 2013); Surakka (Nat Genet 2015);Waterworth (Arterioscler Thromb Vasc Biol 2010)
rs10019888	4	26062990	HDL_C	G	A	0.18	-0.027	5e-08	4794	SouthAsian	Zabaneh (PLoS One 2010)
4-73089908	4	72871044	IDL_TG	G	C	0.02	0.67	1.3e-13	8891	European	Kettunen (Nat Genet 2012)
4-73113868	4	72895004	IDL_TG	T	C	0.02	0.66	1.58e-13	8891	European	Kettunen (Nat Genet 2012)
4-73541429	4	73322565	IDL_TG	C	T	0.02	0.49	5.23e-17	8891	European	Kettunen (Nat Genet 2012)
4-73611298	4	73392434	IDL_TG	G	A	0.01	0.89	2.07e-23	8891	European	Kettunen (Nat Genet 2012)
rs16848079	4	73412023	IDL_TG	T	C	0.04	0.46	2.38e-16	8891	European	Kettunen (Nat Genet 2012)
4-73761504	4	73542640	IDL_TG	T	G	0.02	0.89	8.06e-24	8891	European	Kettunen (Nat Genet 2012)
rs117087731	4	73696709	TC	T	A	0.01	0.308	2.3e-09	23641	European	Surakka (Nat Genet 2015)
rs182616603	4	75084732	TC	T	C	0.01	0.374	1.8e-17	42905	European	Surakka (Nat Genet 2015)
rs2035403	4	88018991	TG	G	A	0.39	0.039	1.8e-10	59994	European	Surakka (Nat Genet 2015)
rs442177	4	88030261	TG	G	T	0.42	-0.031	1e-18	172228	European	Willer (Nat Genet 2013);Surakka (Nat Genet 2015);Aulchenko (Nat Genet 2009)
rs3822072	4	89741269	HDL_C	A	G	0.46	-0.025	4e-12	94000	European	Willer (Nat Genet 2013);Teslovich (Nature 2010)
rs2602836	4	100014805	HDL_C	A	G	0.44	0.019	5e-08	4794	SouthAsian	Zabaneh (PLoS One 2010);Surakka (Nat Genet 2015)
rs13132430	4	100224070	HDL_C	A	G	0.01	0.17	1.1e-08	55394	European	Surakka (Nat Genet 2015)
rs13107325	4	103188709	HDL_C	T	C	0.08	-0.071	1e-15	155007	European	Willer (Nat Genet 2013);Surakka (Nat Genet 2015)
rs13135092	4	103198082	HDL_C	A	G	0.97	0.129	3e-13	54845	European	Surakka (Nat Genet 2015)
rs6450176	5	53298025	HDL_C	A	G	0.26	-0.025	7e-10	26274	EastAsian	Kim (Nat Genet 2011)
rs9686661	5	55861786	TG	T	C	0.2	0.038	3e-16	158000	European	Willer (Nat Genet 2013);Teslovich (Nature 2010);Kathiresan (Nat Genet 2009)
rs10038095	5	74637711	TC	T	A	0.38	0.083	2.9e-43	62027	European	Surakka (Nat Genet 2015)
rs3843482	5	74639259	LDL_C	G	T	0.38	0.087	1.8e-45	58258	European	Surakka (Nat Genet 2015)
rs12654264	5	74648603	LDL_C	T	A	0.48	2.71	1.2e-21	176000	European	Willer (Nat Genet 2013);Dumitrescu (PLoS Genet 2011)
rs3846662	5	74651084	TC	G	A	0.44	0.092	2.5e-19	173000	European	Willer (Nat Genet 2013);Teslovich (Nature 2010)
rs3846663	5	74655726	LDL_C	T	C	0.38	0.07	8e-12	93855	European	Teslovich (Nature 2010)
rs12916	5	74656539	LDL_C	C	T	0.4	0.073	8e-78	187000	European	Willer (Nat Genet 2013);Teslovich (Nature 2010);Kathiresan (Nat Genet 2009);Surakka (Nat Genet 2015);van Leeuwen (Nat Comm 2015)
rs4530754	5	122855416	LDL_C	G	A	0.46	-0.028	4e-12	94000	European	Willer (Nat Genet 2013);Teslovich (Nature 2010);Aulchenko (Nat Genet 2009);Kathiresan (Nat Genet 2008);Willer (Nat Genet 2008); Sabatti (Nat Genet 2009)
rs6882076	5	156390297	TC	T	C	0.36	-0.051	5e-41	186301	European	Willer (Nat Genet 2013);Surakka (Nat Genet 2015);Teslovich (Nature 2010)
rs1501908	5	156398169	LDL_C	G	C	0.37	-0.07	1e-11	93000	European	Willer (Nat Genet 2013);Teslovich (Nature 2010)
chr5:156443066	5	156443066	TC	A	G	0.346	-0.05	2.2e-11	39229	European	van Leeuwen (Nat Comm 2015)
rs1553318	5	156479323	TC	C	G	0.65	0.058	2.4e-21	62096	European	Surakka (Nat Genet 2015);Willer (Nat Genet 2013);Teslovich (Nature 2010)
rs3757354	6	16127407	LDL_C	T	C	0.24	-0.038	2e-17	169708	European	Willer (Nat Genet 2013);Teslovich (Nature 2010);Surakka (Nat Genet 2015)
rs1800562	6	26093141	LDL_C	A	G	0.07	-0.062	8e-14	97559	European	Teslovich (Nature 2010)
rs6917603	6	30017071	XXL_VLDL_P	C	T	0.2	-0.24	2.81e-29	8891	European	Kettunen (Nat Genet 2012);Kettunen et al (Nat Genet 2012)
rs2247056	6	31265490	TG	T	C	0.25	-2.99	1.6e-15	154000	European	Willer (Nat Genet 2013);Teslovich (Nature 2010);Surakka (Nat Genet 2015)
rs3099844	6	31448976	HDL_C	A	C	0.08	-0.15	1.7e-08	17797	European	Aulchenko (Nat Genet 2009)
rs419132	6	32210799	TG	G	A	0.2	0.056	4.7e-12	49919	European	Surakka (Nat Genet 2015)
rs3177928	6	32412435	TC	A	G	0.17	0.048	1e-21	176000	European	Willer (Nat Genet 2013);Teslovich (Nature 2010);Surakka (Nat Genet 2015)
rs114067101	6	32457960	TC	G	A	0.09	0.102	1.4e-16	52046	European	Surakka (Nat Genet 2015)
rs12660719	6	32575983	TG	A	G	N.R.	-	1.1e-08	17815	European	Aulchenko (Nat Genet 2009)
rs116569761	6	32648156	HDL_C	A	G	0.53	0.036	3.5e-08	55575	European	Surakka (Nat Genet 2015)
rs2814982	6	34546560	TC	T	C	0.12	0.045	4e-15	102000	European	Willer (Nat Genet 2013);Teslovich (Nature 2010);Surakka (Nat Genet 2015)
rs2814944	6	34552797	HDL_C	A	G	0.16	-0.49	3.8e-09	21412	European	Aulchenko (Nat Genet 2009); Kristiansson (Circ Cardiovasc Genet 2012);Surakka (Nat Genet 2015)
rs2764209	6	34697114	HDL_C	T	A	0.77	0.044	6e-10	60736	European	Surakka (Nat Genet 2015)
rs3800406	6	35133074	LDL_C	A	G	N.R.	+	1.7e-08	17797	European	Aulchenko (Nat Genet 2009)
rs2758886	6	39250837	TC	A	G	0.3	0.023	3e-08	12545	EastAsian	Kim (Nat Genet 2011)
rs998584	6	43757896	TG	A	C	0.49	0.029	3e-15	111000	European	Willer (Nat Genet 2013);Teslovich (Nature 2010);Surakka (Nat Genet 2015)
rs1358980	6	43764551	TG	T	C	0.47	0.039	3.3e-09	54857	European	Surakka (Nat Genet 2015)
rs9488822	6	116312893	TC	T	A	0.36	0.034	1e-09	23921	EastAsian	Kim (Nat Genet 2011)
rs719726	6	127414801	TG	T	C	0.58	0.026	1.7e-05	59972	European	Surakka (Nat Genet 2015)
rs1936800	6	127436064	HDL_C	C	T	0.49	0.02	3e-10	36329	European	Teslovich (Nature 2010);Kim (Nat Genet 2011);Surakka (Nat Genet 2015)
rs72959041	6	127454893	TG	A	G	0.06	0.075	4.8e-08	54894	European	Surakka (Nat Genet 2015)
rs9376090	6	135411228	TC	C	T	0.28	-0.025	3e-09	21412	European	Aulchenko (Nat Genet 2009)
rs605066	6	139829666	HDL_C	C	T	0.42	-0.028	3e-08	12545	EastAsian	Kim (Nat Genet 2011);Surakka (Nat Genet 2015)
rs17585887	6	139835498	TG	T	C	0.44	0.039	7.1e-11	59937	European	Surakka (Nat Genet 2015)
rs636202	6	139843583	TG	T	C	N.R.	+	2.6e-08	13537	European	Willer (Nat Genet 2008)
rs12208357	6	160543148	TC	T	C	0.06	0.092	8.5e-14	62085	European	Surakka (Nat Genet 2015)
rs2297374	6	160575985	LDL_C	C	T	0.64	0.029	4.7e-06	58315	European	Surakka (Nat Genet 2015)
rs1564348	6	160578860	TC	C	T	0.18	0.049	3e-23	177825	European	Willer (Nat Genet 2013);Surakka (Nat Genet 2015)
rs486359	6	160774441	TG	C	G	N.R.	-	3.6e-09	21412	European	Aulchenko (Nat Genet 2009)
chr6:160985526	6	160985526	LDL	A	G	0.079	0.123	4.4e-15	26519	European	van Leeuwen (Nat Comm 2015)
rs191555775	6	161005389	HDL_C	A	T	0.9	0.057	3.5e-08	60734	European	Surakka (Nat Genet 2015)
chr6:161005610	6	161005610	TC	T	C	0.079	0.134	9.5e-16	27210	European	van Leeuwen (Nat Comm 2015)
rs10455872	6	161010118	TC	A	G	N.R.	-	2.7e-23	178000	European	Willer (Nat Genet 2013);Teslovich (Nature 2010);Sabatti (Nat Genet 2009); Kettunen (Nat Genet 2012)
rs7759633	6	161070990	TG	G	A	0.87	0.051	8.6e-09	59965	European	Surakka (Nat Genet 2015)
rs1084651	6	161089817	HDL_C	A	G	0.16	-0.56	3e-08	12545	EastAsian	Kim (Nat Genet 2011);Surakka (Nat Genet 2015)
rs186696265	6	161111700	LDL_C	T	C	0.01	0.262	4.4e-14	52210	European	Surakka (Nat Genet 2015)
rs1997243	7	1083777	TC	G	A	0.16	0.033	3e-10	35151	European	Kathiresan (Nat Genet 2009)
rs702485	7	6449272	HDL_C	G	A	0.45	0.024	7e-12	93855	European	Teslovich (Nature 2010)
rs4142995	7	17919258	HDL_C	T	G	0.38	-0.026	9e-12	93223	European	Teslovich (Nature 2010)
rs2285942	7	21582917	TC	T	C	0.15	0.054	3.1e-10	56998	European	Surakka (Nat Genet 2015);Kim (Nat Genet 2011)
rs56130071	7	21598753	LDL_C	C	G	0.21	0.057	2.2e-14	58306	European	Surakka (Nat Genet 2015)
rs55649657	7	21607283	TC	G	C	0.21	0.052	4.1e-13	62075	European	Surakka (Nat Genet 2015)
rs12670798	7	21607352	TC	C	T	0.25	0.036	1e-16	163000	European	Willer (Nat Genet 2013);Teslovich (Nature 2010);Surakka (Nat Genet 2015)
chr7:21613842	7	21613842	TC	A	G	0.248	0.052	1.3e-09	38006	European	van Leeuwen (Nat Comm 2015)
rs4722551	7	25991826	LDL_C	C	T	0.2	0.039	4e-14	99889	European	Teslovich (Nature 2010);Kathiresan (Nat Genet 2009)
rs2072183	7	44579180	LDL_C	C	G	0.29	0.039	7e-16	157000	European	Willer (Nat Genet 2013);Teslovich (Nature 2010);Surakka (Nat Genet 2015)
rs41279633	7	44580876	LDL_C	T	G	0.18	0.054	1e-10	58339	European	Surakka (Nat Genet 2015)
rs2073547	7	44582331	LDL_C	G	A	0.23	0.048	1.82e-10	58339	European	Surakka (Nat Genet 2015)
rs10260606	7	44584551	TC	C	G	0.23	0.05	1.1e-11	62108	European	Surakka (Nat Genet 2015)
rs217386	7	44600695	LDL_C	A	G	0.43	-1.17	4.3e-11	88177	European	Teslovich (Nature 2010);Surakka (Nat Genet 2015)
rs4917014	7	50305863	HDL_C	G	T	0.32	0.022	1e-08	19648	European	Kathiresan (Nat Genet 2009)
rs1178947	7	72850178	VLDL_D	C	T	0.16	-0.15	1.87e-11	8891	European	Kettunen (Nat Genet 2012)
chr7:72854549	7	72854549	TG	T	C	0.088	-0.04	3.6e-14	26192	European	van Leeuwen (Nat Comm 2015)
rs2240466	7	72856269	TG	G	A	0.87	0.137	1.1e-12	95454	European	Teslovich (Nature 2010);Kettunen (Nat Genet 2012)
rs1178979	7	72856430	M_VLDL_TG	C	T	0.17	-0.15	9.28e-13	8891	European	Kettunen (Nat Genet 2012);Willer (Nat Genet 2013);Teslovich (Nature 2010)
rs1178977	7	72857049	M_VLDL_TG	G	A	0.17	-0.15	1.1e-12	8891	European	Kettunen (Nat Genet 2012)
rs13231516	7	72863249	VLDL_D	G	T	0.12	-0.16	1.55e-11	8891	European	Kettunen (Nat Genet 2012)
rs714052	7	72864869	TG	G	A	0.12	-0.16	3e-15	104000	European	Willer (Nat Genet 2013);Teslovich (Nature 2010);Kettunen (Nat Genet 2012)
rs34763247	7	72866616	VLDL_D	T	A	0.12	-0.16	1.57e-11	8891	European	Kettunen (Nat Genet 2012)
rs1306476	7	72868522	M_VLDL_TG	G	A	0.17	-0.15	1.14e-12	8891	European	Kettunen (Nat Genet 2012)
rs35330527	7	72870207	VLDL_D	G	A	0.12	-0.16	8.56e-11	8891	European	Kettunen (Nat Genet 2012)
rs2074755	7	72877166	VLDL_D	C	T	0.12	-0.16	1.69e-11	8891	European	Kettunen (Nat Genet 2012)
rs35797675	7	72878044	M_VLDL_TG	G	T	0.15	-0.17	1.74e-12	8891	European	Kettunen (Nat Genet 2012)
rs12056034	7	72878645	VLDL_D	G	A	0.12	-0.16	1.8e-11	8891	European	Kettunen (Nat Genet 2012)
7-72519743	7	72881807	VLDL_D	T	C	0.12	-0.17	1.81e-11	8891	European	Kettunen (Nat Genet 2012)
rs62465144	7	72883106	M_VLDL_TG	C	T	0.17	-0.15	1.31e-12	8891	European	Kettunen (Nat Genet 2012)
rs6976930	7	72885810	M_VLDL_TG	G	A	0.83	0.15	1.63e-12	8891	European	Kettunen (Nat Genet 2012)
rs35695283	7	72893403	VLDL_D	G	A	0.12	-0.16	2.09e-11	8891	European	Kettunen (Nat Genet 2012)
7-72533882	7	72895946	VLDL_D	C	T	0.12	-0.16	2.08e-11	8891	European	Kettunen (Nat Genet 2012)
rs7797566	7	72896395	VLDL_D	C	A	0.12	-0.16	2.08e-11	8891	European	Kettunen (Nat Genet 2012)
rs17145713	7	72904810	M_VLDL_TG	T	C	0.17	-0.15	1.1e-12	8891	European	Kettunen (Nat Genet 2012)
7-72545395	7	72907459	VLDL_D	T	C	0.12	-0.16	2.05e-11	8891	European	Kettunen (Nat Genet 2012)
rs13244268	7	72911843	VLDL_D	C	T	0.12	-0.16	2.04e-11	8891	European	Kettunen (Nat Genet 2012)
7-72559545	7	72921609	VLDL_D	C	T	0.12	-0.17	1.21e-11	8891	European	Kettunen (Nat Genet 2012)
rs13221253	7	72922233	VLDL_D	G	A	0.12	-0.17	1.21e-11	8891	European	Kettunen (Nat Genet 2012)
rs7811265	7	72934510	TG	G	A	0.1	-0.066	1e-59	187000	European	Willer (Nat Genet 2013);Teslovich (Nature 2010);Surakka (Nat Genet 2015);Kettunen (Nat Genet 2012)
rs62466264	7	72938718	M_VLDL_TG	C	T	0.16	-0.16	1.11e-12	8891	European	Kettunen (Nat Genet 2012)
rs11983997	7	72939244	M_VLDL_TG	C	G	0.17	-0.15	1.41e-12	8891	European	Kettunen (Nat Genet 2012)
7-72577875	7	72939939	VLDL_D	C	T	0.12	-0.16	1.96e-11	8891	European	Kettunen (Nat Genet 2012)
rs17145732	7	72970268	M_VLDL_TG	G	T	0.23	-0.12	7.88e-11	8891	European	Kettunen (Nat Genet 2012)
rs13233571	7	72971231	VLDL_D	T	C	0.12	-0.17	6e-12	8891	European	Kettunen (Nat Genet 2012)
rs7793710	7	72971531	VLDL_D	G	C	0.23	-0.12	5.14e-11	8891	European	Kettunen (Nat Genet 2012)
rs13234157	7	72971728	VLDL_D	A	C	0.14	-0.16	1.95e-11	8891	European	Kettunen (Nat Genet 2012)
rs34594435	7	72977249	M_VLDL_TG	T	C	0.17	-0.15	5.24e-12	8891	European	Kettunen (Nat Genet 2012)
rs6946689	7	72977637	VLDL_D	A	T	0.22	-0.13	4.52e-11	8891	European	Kettunen (Nat Genet 2012)
rs12539316	7	72977898	VLDL_D	G	A	0.23	-0.12	4.66e-11	8891	European	Kettunen (Nat Genet 2012)
rs12539351	7	72978112	VLDL_D	G	A	0.19	-0.14	4.3e-11	8891	European	Kettunen (Nat Genet 2012)
rs17145738	7	72982874	TG	T	C	0.13	-0.115	9e-99	187102	European	Willer (Nat Genet 2013);Dumitrescu (PLoS Genet 2011);Teslovich (Nature 2010);Kettunen (Nat Genet 2012);Surakka (Nat Genet 2015)
rs13232120	7	72983310	VLDL_D	T	A	0.12	-0.17	6.96e-12	8891	European	Kettunen (Nat Genet 2012)
rs14415	7	72984780	VLDL_D	C	T	0.23	-0.12	3.74e-11	8891	European	Kettunen (Nat Genet 2012)
rs2286276	7	72987354	TG	T	C	0.1	-0.065	1.4e-15	154000	European	Willer (Nat Genet 2013);Teslovich (Nature 2010);Kettunen (Nat Genet 2012)
rs35659126	7	72988069	VLDL_D	T	C	0.17	-0.15	9.72e-13	8891	European	Kettunen (Nat Genet 2012)
rs11974409	7	72989390	VLDL_D	G	A	0.17	-0.15	1.08e-12	8891	European	Kettunen (Nat Genet 2012)
rs35624969	7	72991592	VLDL_D	C	T	0.17	-0.15	4.69e-12	8891	European	Kettunen (Nat Genet 2012)
rs35348663	7	72991593	VLDL_D	C	G	0.16	-0.16	7.43e-13	8891	European	Kettunen (Nat Genet 2012)
rs12540011	7	72991704	M_VLDL_TG	A	G	0.23	-0.13	1.22e-10	8891	European	Kettunen (Nat Genet 2012)
rs13246490	7	72992350	VLDL_D	T	C	0.12	-0.17	2.59e-12	8891	European	Kettunen (Nat Genet 2012)
7-72633879	7	72995943	M_VLDL_TG	C	T	0.19	-0.15	1.51e-11	8891	European	Kettunen (Nat Genet 2012)
7-72633890	7	72995954	M_VLDL_TG	T	C	0.19	-0.15	1.51e-11	8891	European	Kettunen (Nat Genet 2012)
rs9638180	7	72998952	VLDL_D	G	A	0.17	-0.15	9.23e-13	8891	European	Kettunen (Nat Genet 2012)
rs9638182	7	72999105	TG	T	G	0.81	0.1	1.2e-40	59981	European	Surakka (Nat Genet 2015);Kettunen (Nat Genet 2012)
rs35173225	7	73001021	VLDL_D	T	C	0.12	-0.17	5.57e-12	8891	European	Kettunen (Nat Genet 2012)
rs1051921	7	73007943	VLDL_D	A	G	0.17	-0.15	8.65e-13	8891	European	Kettunen (Nat Genet 2012)
rs13247874	7	73010442	VLDL_D	T	C	0.2	-0.16	8.43e-14	8891	European	Kettunen (Nat Genet 2012)
rs35332062	7	73012042	VLDL_D	A	G	0.13	-0.17	1.95e-12	8891	European	Kettunen (Nat Genet 2012)
7-72650721	7	73012785	VLDL_D	G	A	0.12	-0.19	3.71e-12	8891	European	Kettunen (Nat Genet 2012)
rs13235543	7	73013901	VLDL_D	T	C	0.13	-0.17	8.11e-12	8891	European	Kettunen (Nat Genet 2012)
rs13240065	7	73015369	VLDL_D	A	G	0.14	-0.17	1.24e-11	8891	European	Kettunen (Nat Genet 2012)
rs34346326	7	73016181	VLDL_D	C	T	0.16	-0.15	2.87e-11	8891	European	Kettunen (Nat Genet 2012)
rs56383788	7	73016400	VLDL_D	G	A	0.17	-0.15	1.91e-12	8891	European	Kettunen (Nat Genet 2012)
rs13226650	7	73017005	VLDL_D	G	A	0.17	-0.15	1.46e-12	8891	European	Kettunen (Nat Genet 2012);Teslovich (Nature 2010)
rs35368205	7	73017657	VLDL_D	T	C	0.18	-0.15	2.53e-12	8891	European	Kettunen (Nat Genet 2012)
rs3812316	7	73020337	VLDL_D	G	C	0.13	-0.17	1.8e-12	8891	European	Kettunen (Nat Genet 2012)
rs6968170	7	73020676	VLDL_D	A	G	0.23	-0.12	1.16e-10	8891	European	Kettunen (Nat Genet 2012)
rs12531645	7	73023881	VLDL_D	A	G	0.23	-0.12	5.1e-11	8891	European	Kettunen (Nat Genet 2012)
rs13234378	7	73026151	VLDL_D	T	A	0.08	-0.27	4.38e-13	8891	European	Kettunen (Nat Genet 2012)
rs17145750	7	73026378	VLDL_D	T	C	0.15	-0.15	1.6e-11	8891	European	Kettunen (Nat Genet 2012)
rs7808877	7	73027450	M_VLDL_TG	G	C	0.23	-0.13	4.11e-11	8891	European	Kettunen (Nat Genet 2012)
rs33951980	7	73029437	VLDL_D	T	C	0.13	-0.17	1.64e-12	8891	European	Kettunen (Nat Genet 2012)
rs7798357	7	73032265	M_VLDL_TG	C	G	0.24	-0.12	1.05e-10	8891	European	Kettunen (Nat Genet 2012)
rs7785479	7	73032835	VLDL_D	C	T	0.23	-0.12	7.6e-11	8891	European	Kettunen (Nat Genet 2012)
rs7800944	7	73035857	VLDL_D	C	T	0.23	-0.12	5.93e-11	8891	European	Kettunen (Nat Genet 2012)
rs55747707	7	73037366	M_VLDL_TG	A	G	0.18	-0.15	1.54e-12	8891	European	Kettunen (Nat Genet 2012)
rs34060476	7	73037956	VLDL_D	G	A	0.14	-0.17	6.61e-12	8891	European	Kettunen (Nat Genet 2012)
rs35493868	7	73039406	M_VLDL_TG	G	C	0.18	-0.15	1.5e-12	8891	European	Kettunen (Nat Genet 2012)
rs34121855	7	73040814	M_VLDL_TG	G	T	0.18	-0.15	1.47e-12	8891	European	Kettunen (Nat Genet 2012)
rs62466318	7	73042085	M_VLDL_TG	T	C	0.18	-0.15	1.43e-12	8891	European	Kettunen (Nat Genet 2012)
rs7786376	7	73042614	M_VLDL_TG	G	A	0.21	-0.14	2.17e-11	8891	European	Kettunen (Nat Genet 2012)
rs34958196	7	73043101	VLDL_D	A	G	0.1	-0.21	1.1e-10	8891	European	Kettunen (Nat Genet 2012)
7-72683874	7	73045938	VLDL_D	C	T	0.13	-0.17	5.83e-11	8891	European	Kettunen (Nat Genet 2012)
rs13234805	7	73049182	VLDL_D	A	G	0.13	-0.17	5.99e-11	8891	European	Kettunen (Nat Genet 2012)
rs799166	7	73051932	VLDL_D	G	C	0.13	-0.17	6.15e-11	8891	European	Kettunen (Nat Genet 2012)
rs799165	7	73052057	VLDL_D	A	T	0.13	-0.17	6.17e-11	8891	European	Kettunen (Nat Genet 2012)
rs7777102	7	73058017	VLDL_D	G	A	0.13	-0.16	5.43e-11	8891	European	Kettunen (Nat Genet 2012)
rs2366858	7	80340622	HDL_C	C	A	0.173	0.033	5.59e-10	7917	African-American	Coram (Am J Hum Gen 2013)
rs2255811	7	112722196	TG	G	A	0.25	0.041	2.3e-08	59962	European	Surakka (Nat Genet 2015)
rs38855	7	116358044	TG	G	A	0.47	-0.019	2e-08	16058	European	Waterworth (Arterioscler Thromb Vasc Biol 2010)
rs13241165	7	130432538	HDL_C	T	A	0.51	0.037	8.4e-10	60753	European	Surakka (Nat Genet 2015)
rs4731702	7	130433384	HDL_C	T	C	0.49	0.029	5e-17	165000	European	Willer (Nat Genet 2013);Teslovich (Nature 2010);Surakka (Nat Genet 2015)
rs1562398	7	130457931	TG	C	G	N.R.	-	2.4e-08	15637	European	Willer (Nat Genet 2008); Waterworth (Arterioscler Thromb Vasc Biol 2010); Heid (Circ Cardovasc Genet 2008)
rs17173637	7	150529449	HDL_C	C	T	0.12	-0.036	2e-08	16056	European	Waterworth (Arterioscler Thromb Vasc Biol 2010)
rs2169387	8	9181395	LDL_C	G	A	0.89	0.083	3.1e-16	53066	European	Surakka (Nat Genet 2015);van Leeuwen (Nat Comm 2015)
rs9987289	8	9183358	HDL_C	A	G	0.1	-0.082	2e-41	186809	European	Willer (Nat Genet 2013);Teslovich (Nature 2010);Surakka (Nat Genet 2015);Tukiainen (Hum Molec Genet 2012);Kraja (Diabetes 2011)
rs4841132	8	9183596	HDL_C	G	A	0.9	0.094	4e-20	55466	European	Surakka (Nat Genet 2015)
chr8:9184231	8	9184231	TC	G	A	0.088	-0.101	2.6e-15	37886	European	van Leeuwen (Nat Comm 2015)
rs2126259	8	9185146	TC	T	C	0.1	-3.14	9e-24	178000	European	Willer (Nat Genet 2013);Surakka (Nat Genet 2015);Teslovich (Nature 2010)
rs1461729	8	9187242	HDL_C	T	C	0.116	-0.036	7.39e-09	7917	African-American	Coram (Am J Hum Gen 2013)
rs11776767	8	10683929	TG	C	G	0.37	0.022	3e-11	90000	European	Willer (Nat Genet 2013);Teslovich (Nature 2010)
rs7819412	8	11045161	TG	G	A	0.48	-0.04	3e-08	12545	EastAsian	Kim (Nat Genet 2011)
rs1961456	8	18255709	TC	G	A	0.32	1.07	1.7e-09	22562	European	Aulchenko (Nat Genet 2009)
rs1495741	8	18272881	TG	G	A	0.26	0.04	3e-12	94899	European	Teslovich (Nature 2010);Willer (Nat Genet 2008)
rs1495743	8	18273300	TG	G	C	0.22	2.7	4.1e-14	99811	European	Teslovich (Nature 2010)
chr8:19772641	8	19772641	HDL_C	C	T	0.018	-0.078	4.3e-11	32891	European	van Leeuwen (Nat Comm 2015)
chr8:19785656	8	19785656	TG	A	G	0.02	0.092	2.7e-08	9434	European	van Leeuwen (Nat Comm 2015)
chr8:19793581	8	19793581	HDL_C	T	C	0.028	-0.103	7.6e-23	28969	European	van Leeuwen (Nat Comm 2015)
rs7016529	8	19806631	HDL_C	T	C	N.R.	+	6.4e-37	186000	European	Willer (Nat Genet 2013);Teslovich (Nature 2010)
rs268	8	19813529	HDL_C	G	A	0.02	-0.38	1.9e-12	95438	European	Teslovich (Nature 2010)
rs286	8	19815256	M_VLDL_PL	T	A	0.1	-0.19	7.16e-12	8891	European	Kettunen (Nat Genet 2012)
rs325	8	19819328	HDL_C	T	C	0.89	-0.047	7.8e-25	178000	European	Willer (Nat Genet 2013);Teslovich (Nature 2010); Waterworth (Arterioscler Thromb Vasc Biol 2010);van Leeuwen (Nat Comm 2015);Kettunen (Nat Genet 2012)
chr8:19819439	8	19819439	HDL_C	G	A	0.296	0.028	1.2e-12	36775	European	van Leeuwen (Nat Comm 2015)
rs328	8	19819724	TG	C	G	0.9	0.09	4.16e-30	24258	European	Dumitrescu (PLoS Genet 2011);Willer (Nat Genet 2013);Willer (Nat Genet 2013);Teslovich (Nature 2010);Kettunen (Nat Genet 2012);Teslovich (Nature 2010); Smith (PLoS Genet 2010);Holmen (Nat Genet 2014)
rs12679834	8	19820433	M_VLDL_PL	C	T	0.09	-0.19	3.49e-12	8891	European	Kettunen (Nat Genet 2012)
8-19865196	8	19820916	M_VLDL_PL	T	C	0.05	-0.27	7.27e-11	8891	European	Kettunen (Nat Genet 2012)
8-19865705	8	19821425	M_VLDL_PL	G	T	0.09	-0.19	6.78e-12	8891	European	Kettunen (Nat Genet 2012)
8-19866062	8	19821782	M_VLDL_PL	G	T	0.09	-0.19	6.67e-12	8891	European	Kettunen (Nat Genet 2012)
rs11570891	8	19822810	M_VLDL_PL	T	C	0.09	-0.19	6.45e-12	8891	European	Kettunen (Nat Genet 2012)
rs1803924	8	19823674	M_VLDL_PL	T	C	0.09	-0.19	6.32e-12	8891	European	Kettunen (Nat Genet 2012)
rs3735964	8	19824045	M_VLDL_PL	A	C	0.09	-0.19	7.92e-12	8891	European	Kettunen (Nat Genet 2012)
rs13702	8	19824492	HDL Cholesterol _ TG (HDLC_TG)	A	G	0.279	0.29	1e-16	22161	European	Kraja (Diabetes 2011)
chr8:19824563	8	19824563	TG	C	T	0.119	-0.051	6.4e-26	32832	European	van Leeuwen (Nat Comm 2015);Kettunen (Nat Genet 2012)
rs15285	8	19824667	TG_Blood Pressure (TG_BP)	A	G	0.145	-0.27	1.3e-10	22161	European	Kraja (Diabetes 2011)
8-19870582	8	19826302	M_VLDL_PL	C	G	0.09	-0.19	5.9e-12	8891	European	Kettunen (Nat Genet 2012)
8-19870598	8	19826318	M_VLDL_PL	G	A	0.09	-0.19	5.9e-12	8891	European	Kettunen (Nat Genet 2012)
rs2197089	8	19826373	TG	T	C	0.55	-0.03	4.97e-15	24258	European	Dumitrescu (PLoS Genet 2011);Teslovich (Nature 2010);Willer (Nat Genet 2013)
8-19870981	8	19826701	M_VLDL_PL	T	C	0.09	-0.19	2.05e-12	8891	European	Kettunen (Nat Genet 2012)
rs10105606	8	19827848	TG	C	A	0.68	0.067	3.6e-25	178000	European	Willer (Nat Genet 2013);Teslovich (Nature 2010)
rs1569209	8	19830170	M_VLDL_PL	G	T	0.09	-0.19	1.83e-12	8891	European	Kettunen (Nat Genet 2012)
rs1011685	8	19830769	M_VLDL_PL	T	C	0.09	-0.19	1.77e-12	8891	European	Kettunen (Nat Genet 2012)
rs10096633	8	19830921	TG	G	A	0.88	0.174	1.9e-18	172000	European	Willer (Nat Genet 2013);Teslovich (Nature 2010);Kettunen (Nat Genet 2012)
rs17482753	8	19832646	M_VLDL_PL	T	G	0.09	-0.19	1.89e-12	8891	European	Kettunen (Nat Genet 2012);Teslovich (Nature 2010);Keller (J Lipid Res 2013);Kathiresan (Nat Genet 2009)
8-19877436	8	19833156	M_VLDL_PL	T	A	0.11	-0.17	4.58e-11	8891	European	Kettunen (Nat Genet 2012)
8-19880926	8	19836646	M_VLDL_PL	C	T	0.09	-0.19	1.82e-12	8891	European	Kettunen (Nat Genet 2012)
8-19881264	8	19836984	M_VLDL_PL	T	C	0.09	-0.2	1.39e-12	8891	European	Kettunen (Nat Genet 2012)
8-19883989	8	19839709	M_VLDL_PL	T	C	0.09	-0.2	1.64e-12	8891	European	Kettunen (Nat Genet 2012)
rs58946909	8	19840341	M_VLDL_PL	A	G	0.09	-0.19	1.82e-12	8891	European	Kettunen (Nat Genet 2012)
8-19884688	8	19840408	M_VLDL_PL	C	G	0.09	-0.19	1.82e-12	8891	European	Kettunen (Nat Genet 2012);Wu (PLoS Genet 2013)
rs17091891	8	19843171	M_VLDL_PL	C	T	0.09	-0.2	3.65e-13	8891	European	Kettunen (Nat Genet 2012)
rs17410914	8	19843462	M_VLDL_PL	A	C	0.09	-0.19	1.85e-12	8891	European	Kettunen (Nat Genet 2012)
8-19887859	8	19843579	M_VLDL_PL	C	G	0.09	-0.19	1.85e-12	8891	European	Kettunen (Nat Genet 2012)
8-19888141	8	19843861	M_VLDL_PL	A	G	0.07	-0.24	1.34e-13	8891	European	Kettunen (Nat Genet 2012)
rs59147390	8	19843879	M_VLDL_PL	C	T	0.07	-0.24	1.34e-13	8891	European	Kettunen (Nat Genet 2012)
rs12678919	8	19844222	TG	G	A	0.13	-0.17	2e-199	187263	European	Willer (Nat Genet 2013);Surakka (Nat Genet 2015);Kettunen (Nat Genet 2012)
rs7819706	8	19844415	M_VLDL_PL	G	A	0.1	-0.2	1.39e-13	8891	European	Kettunen (Nat Genet 2012)
8-19888719	8	19844439	M_VLDL_PL	G	C	0.09	-0.19	1.87e-12	8891	European	Kettunen (Nat Genet 2012)
rs7841189	8	19845376	TG	C	T	0.9	0.18	9.7e-15	100184	European	Teslovich (Nature 2010);Kettunen (Nat Genet 2012)
8-19890594	8	19846314	M_VLDL_PL	G	T	0.1	-0.2	1.35e-12	8891	European	Kettunen (Nat Genet 2012)
8-19890769	8	19846489	M_VLDL_PL	G	C	0.09	-0.19	1.86e-12	8891	European	Kettunen (Nat Genet 2012)
rs12682115	8	19847060	M_VLDL_PL	A	G	0.09	-0.19	1.62e-12	8891	European	Kettunen (Nat Genet 2012)
8-19891503	8	19847223	M_VLDL_PL	C	T	0.09	-0.19	1.87e-12	8891	European	Kettunen (Nat Genet 2012)
8-19891721	8	19847441	M_VLDL_PL	A	C	0.09	-0.19	1.87e-12	8891	European	Kettunen (Nat Genet 2012)
rs10503669	8	19847690	HDL_C	T	G	0.12	0.043	8e-43	186927	European	Willer (Nat Genet 2013);Teslovich (Nature 2010);Kettunen (Nat Genet 2012)
rs17410962	8	19848080	M_VLDL_PL	A	G	0.1	-0.2	1.2e-13	8891	European	Kettunen (Nat Genet 2012);Coram (Am J Hum Gen 2013)
rs17489185	8	19848499	M_VLDL_PL	C	G	0.09	-0.19	1.87e-12	8891	European	Kettunen (Nat Genet 2012)
rs17410983	8	19848693	M_VLDL_PL	T	C	0.09	-0.19	1.86e-12	8891	European	Kettunen (Nat Genet 2012)
rs17489226	8	19848878	M_VLDL_PL	T	A	0.09	-0.19	1.86e-12	8891	European	Kettunen (Nat Genet 2012)
rs17410996	8	19849272	M_VLDL_PL	G	T	0.09	-0.19	1.87e-12	8891	European	Kettunen (Nat Genet 2012)
8-19893950	8	19849670	M_VLDL_PL	G	T	0.09	-0.19	1.87e-12	8891	European	Kettunen (Nat Genet 2012)
rs17091905	8	19849757	TG	A	G	0.124	-0.174	5.1e-15	100184	European	Teslovich (Nature 2010);Kettunen (Nat Genet 2012)
8-19894269	8	19849989	M_VLDL_PL	G	A	0.09	-0.19	1.87e-12	8891	European	Kettunen (Nat Genet 2012)
8-19894379	8	19850099	M_VLDL_PL	G	T	0.09	-0.19	1.87e-12	8891	European	Kettunen (Nat Genet 2012)
8-19895788	8	19851508	M_VLDL_PL	A	C	0.09	-0.2	2.6e-12	8891	European	Kettunen (Nat Genet 2012)
rs17411024	8	19852134	M_VLDL_PL	A	G	0.09	-0.19	2.66e-12	8891	European	Kettunen (Nat Genet 2012)
rs17091909	8	19852156	M_VLDL_PL	T	G	0.1	-0.2	1.26e-13	8891	European	Kettunen (Nat Genet 2012)
rs17411113	8	19855006	M_VLDL_PL	G	C	0.09	-0.19	1.9e-12	8891	European	Kettunen (Nat Genet 2012)
8-19904477	8	19860197	M_VLDL_PL	C	A	0.09	-0.19	1.88e-12	8891	European	Kettunen (Nat Genet 2012)
8-19904740	8	19860460	M_VLDL_PL	G	C	0.09	-0.19	1.88e-12	8891	European	Kettunen (Nat Genet 2012)
rs6586884	8	19863358	M_VLDL_PL	C	T	0.09	-0.19	1.87e-12	8891	European	Kettunen (Nat Genet 2012)
rs6999813	8	19863471	M_VLDL_PL	A	T	0.09	-0.19	1.87e-12	8891	European	Kettunen (Nat Genet 2012)
rs2083637	8	19865175	HDL_C	G	A	0.26	0.107	5.5e-18	170762	European	Willer (Nat Genet 2013);Teslovich (Nature 2010);Kathiresan (Nat Genet 2009)
8-19909735	8	19865455	M_VLDL_PL	T	A	0.11	-0.17	3.74e-11	8891	European	Kettunen (Nat Genet 2012)
8-19915393	8	19871113	M_VLDL_PL	T	C	0.09	-0.2	9.03e-13	8891	European	Kettunen (Nat Genet 2012)
rs28675909	8	19876234	M_VLDL_PL	T	A	0.09	-0.2	6.66e-13	8891	European	Kettunen (Nat Genet 2012)
8-19920544	8	19876264	M_VLDL_PL	T	C	0.09	-0.2	6.66e-13	8891	European	Kettunen (Nat Genet 2012)
8-19920804	8	19876524	M_VLDL_PL	T	C	0.09	-0.2	6.39e-13	8891	European	Kettunen (Nat Genet 2012)
8-19920874	8	19876594	M_VLDL_PL	C	G	0.09	-0.2	6.32e-13	8891	European	Kettunen (Nat Genet 2012)
rs7016880	8	19876746	M_VLDL_PL	C	G	0.09	-0.2	6.29e-13	8891	European	Kettunen (Nat Genet 2012)
rs7007609	8	19876797	M_VLDL_PL	C	T	0.09	-0.2	6.12e-13	8891	European	Kettunen (Nat Genet 2012)
rs7007797	8	19876970	M_VLDL_PL	G	T	0.09	-0.2	6.12e-13	8891	European	Kettunen (Nat Genet 2012)
rs7004149	8	19877208	M_VLDL_PL	G	A	0.08	-0.22	2.69e-13	8891	European	Kettunen (Nat Genet 2012)
rs7004158	8	19877233	M_VLDL_PL	G	A	0.09	-0.2	6.11e-13	8891	European	Kettunen (Nat Genet 2012)
rs6983430	8	19877253	M_VLDL_PL	C	G	0.09	-0.2	6.1e-13	8891	European	Kettunen (Nat Genet 2012)
8-19921741	8	19877461	M_VLDL_PL	C	T	0.09	-0.2	6.06e-13	8891	European	Kettunen (Nat Genet 2012)
rs12678603	8	19877732	M_VLDL_PL	T	C	0.09	-0.2	6.03e-13	8891	European	Kettunen (Nat Genet 2012)
rs12678604	8	19877773	M_VLDL_PL	G	C	0.09	-0.2	6.03e-13	8891	European	Kettunen (Nat Genet 2012)
8-19922984	8	19878704	M_VLDL_PL	A	T	0.09	-0.2	5.8e-13	8891	European	Kettunen (Nat Genet 2012)
8-19924089	8	19879809	M_VLDL_PL	A	G	0.09	-0.2	5.51e-13	8891	European	Kettunen (Nat Genet 2012)
rs11989309	8	19880330	M_VLDL_PL	T	C	0.09	-0.2	5.35e-13	8891	European	Kettunen (Nat Genet 2012)
8-19925006	8	19880726	M_VLDL_PL	T	C	0.09	-0.2	5.2e-13	8891	European	Kettunen (Nat Genet 2012)
8-19925320	8	19881040	M_VLDL_PL	A	G	0.09	-0.2	5.11e-13	8891	European	Kettunen (Nat Genet 2012)
8-19925338	8	19881058	M_VLDL_PL	G	A	0.09	-0.2	5.11e-13	8891	European	Kettunen (Nat Genet 2012)
8-19925516	8	19881236	M_VLDL_PL	A	G	0.09	-0.2	5.06e-13	8891	European	Kettunen (Nat Genet 2012)
rs60223219	8	19881801	M_VLDL_PL	G	A	0.09	-0.2	4.91e-13	8891	European	Kettunen (Nat Genet 2012)
rs7816447	8	19882950	M_VLDL_PL	C	T	0.09	-0.2	5.34e-13	8891	European	Kettunen (Nat Genet 2012)
8-19928537	8	19884257	M_VLDL_PL	A	G	0.09	-0.21	1.97e-13	8891	European	Kettunen (Nat Genet 2012)
rs11984636	8	19885726	M_VLDL_PL	C	T	0.09	-0.21	4.06e-13	8891	European	Kettunen (Nat Genet 2012)
8-19931442	8	19887162	M_VLDL_PL	T	A	0.09	-0.21	3.84e-13	8891	European	Kettunen (Nat Genet 2012)
8-19943441	8	19899161	M_VLDL_PL	C	T	0.09	-0.21	1.28e-13	8891	European	Kettunen (Nat Genet 2012)
rs6993414	8	19902918	M_VLDL_PL	G	A	0.09	-0.22	1.22e-13	8891	European	Kettunen (Nat Genet 2012);Teslovich (Nature 2010)
8-19947530	8	19903250	M_VLDL_PL	A	G	0.09	-0.22	1.21e-13	8891	European	Kettunen (Nat Genet 2012)
8-19950184	8	19905904	M_VLDL_PL	G	C	0.09	-0.22	1.16e-13	8891	European	Kettunen (Nat Genet 2012)
rs11991231	8	19907912	M_VLDL_PL	C	T	0.09	-0.22	1.12e-13	8891	European	Kettunen (Nat Genet 2012)
rs894210	8	19910123	HDL_C	A	G	0.058	0.069	1e-90	188578	European	Do (Nat Genet 2013)
rs115849089	8	19912370	TG	G	A	0.89	0.186	9.3e-84	59869	European	Surakka (Nat Genet 2015);Kettunen (Nat Genet 2012)
rs6586891	8	19914598	HDL_C	A	C	0.66	0.96	5.88e-11	25167	European	Dumitrescu (PLoS Genet 2011);Kim (Nat Genet 2011)
rs9644568	8	19928582	Hypertriglyceridemia	A	G	0.07	0.5	3.72e-11	4361	Mexican	Weissglas-Volkov (J Med Gen 2013)
8-19975778	8	19931498	M_VLDL_C	G	A	0.08	-0.25	7.15e-14	8891	European	Kettunen (Nat Genet 2012)
8-19977143	8	19932863	M_VLDL_CE	T	C	0.07	-0.26	2.7e-13	8891	European	Kettunen (Nat Genet 2012)
8-19977369	8	19933089	M_VLDL_C	G	C	0.08	-0.25	8.61e-14	8891	European	Kettunen (Nat Genet 2012)
8-19978619	8	19934339	M_VLDL_CE	C	T	0.08	-0.25	1.35e-13	8891	European	Kettunen (Nat Genet 2012)
rs7015766	8	19939049	M_VLDL_CE	T	C	0.09	-0.26	6.95e-13	8891	European	Kettunen (Nat Genet 2012)
rs10102164	8	55421614	LDL_C	A	G	0.21	0.032	4e-11	90000	European	Willer (Nat Genet 2013);Teslovich (Nature 2010)
rs1030431	8	59311697	TC	A	G	0.35	1.26	8.8e-13	96580	European	Teslovich (Nature 2010);Aulchenko (Nat Genet 2009);Surakka (Nat Genet 2015)
rs2081687	8	59388565	TC	T	C	0.36	0.038	9e-12	93000	European	Willer (Nat Genet 2013);Teslovich (Nature 2010);Kathiresan (Nat Genet 2009);Willer (Nat Genet 2008); Sandhu (Lancet 2008); Waterworth (Arterioscler Thromb Vasc Biol 2010); Saxena (Science 20
rs9297994	8	59392324	LDL_C	G	A	0.34	0.042	2e-11	58306	European	Surakka (Nat Genet 2015)
rs4738684	8	59393273	TC	A	G	0.34	0.041	2.8e-11	62064	European	Surakka (Nat Genet 2015)
rs2293889	8	116599199	HDL_C	T	G	0.41	-0.031	4e-17	166000	European	Willer (Nat Genet 2013);Teslovich (Nature 2010)
rs2737229	8	116648565	TC	C	A	0.3	-1.11	2.5e-08	15612	European	Willer (Nat Genet 2008)
rs2001945	8	126477978	TG	C	G	0.42	0.041	1.4e-20	29262	EastAsian	Kim (Nat Genet 2011)
rs2954022	8	126482621	TC	A	C	0.46	-2.3	5e-36	185498	European	Willer (Nat Genet 2013);Surakka (Nat Genet 2015)
rs2954026	8	126484526	HDL Cholesterol _ TG (HDLC_TG)	G	T	0.307	-0.16	7.9e-09	22161	European	Kraja (Diabetes 2011)
rs17321515	8	126486409	TG	G	A	0.49	-0.08	4e-17	165161	European	Willer (Nat Genet 2013)
NA	8	126490291	TG	T	C	0.54	0.094	6.5e-52	57624	European	Surakka (Nat Genet 2015)
rs2954029	8	126490972	TG	T	A	0.47	-0.076	1e-107	187107	European	Willer (Nat Genet 2013);Teslovich (Nature 2010);Surakka (Nat Genet 2015);Aulchenko (Nat Genet 2009)
rs2954033	8	126493746	TG_Blood Pressure (TG_BP)	A	G	0.303	0.17	9e-09	22161	European	Kraja (Diabetes 2011)
rs10808546	8	126495818	HDL_C	T	C	0.44	0.61	6.4e-19	172855	European	Willer (Nat Genet 2013);Surakka (Nat Genet 2015);van Leeuwen (Nat Comm 2015)
chr8:126500031	8	126500031	TC	G	C	0.441	-0.069	6.1e-22	40031	European	van Leeuwen (Nat Comm 2015)
rs12677676	8	126502526	TC	A	G	N.R.	-	2e-09	22562	European	Aulchenko (Nat Genet 2009)
rs6987702	8	126504726	TC	G	A	0.29	0.07	3.3e-09	21412	European	Aulchenko (Nat Genet 2009)
rs112875651	8	126506694	TC	G	A	0.6	0.08	1.3e-38	62046	European	Surakka (Nat Genet 2015)
rs11136341	8	145043543	LDL_C	G	A	0.4	0.045	7e-12	93855	European	Teslovich (Nature 2010);Willer (Nat Genet 2008); Waterworth (Arterioscler Thromb Vasc Biol 2010);Surakka (Nat Genet 2015)
rs11784833	8	145063412	LDL_C	C	T	0.36	0.042	2.1e-10	52867	European	Surakka (Nat Genet 2015)
chr8:145069534	8	145069534	LDL	T	C	0.338	0.041	1.2e-08	37800	European	van Leeuwen (Nat Comm 2015)
rs3780181	9	2640759	TC	G	A	0.08	0.044	7e-10	26255	EastAsian	Kim (Nat Genet 2011);Aulchenko (Nat Genet 2009)
rs471364	9	15289578	HDL_C	C	T	0.12	-0.08	3e-10	33885	European	Albrechtsen (Diabetalogia 2013)
rs540885	9	15294596	HDL_C	A	G	0.87	0.055	5.2e-10	60701	European	Surakka (Nat Genet 2015)
rs643531	9	15296034	HDL_C	C	A	0.14	-0.72	1.3e-13	97148	European	Teslovich (Nature 2010);Surakka (Nat Genet 2015)
chr9:15298666	9	15298666	HDL_C	T	C	0.145	-0.023	7.8e-09	38494	European	van Leeuwen (Nat Comm 2015)
rs581080	9	15305378	HDL_C	G	C	0.21	-0.042	1e-19	173000	European	Willer (Nat Genet 2013);Teslovich (Nature 2010);Surakka (Nat Genet 2015)
rs1323432	9	104362937	HDL_C	A	G	0.87	1.93	2.5e-08	14885	European	Heid (Circ Cardovasc Genet 2008)
rs4149311	9	107588777	TC	T	C	N.R.	+	2.3e-10	40248	European	Kathiresan (Nat Genet 2009)
rs9282541	9	107620835	HDL_C	A	G	0.11	-0.37	6.4e-26	4361	Mexican	Weissglas-Volkov (J Med Gen 2013)
rs11789603	9	107647019	HDL_C	T	C	N.R.	+	4.5e-14	98656	European	Teslovich (Nature 2010)
rs4149268	9	107647220	HDL_C	C	T	0.355	0.82	1.2e-10	81000	European	Willer (Nat Genet 2013)
rs3890182	9	107647655	HDL_C	A	G	0.13	-0.1	3e-10	33336	European	Kathiresan (Nat Genet 2009)
rs12686004	9	107653426	HDL_C	T	C	0.21	-0.022	2.2e-18	171976	European	Willer (Nat Genet 2013)
rs3905000	9	107657070	HDL_C	G	A	0.86	0.113	8.6e-13	96590	European	Teslovich (Nature 2010)
rs2740488	9	107661742	HDL_C	A	C	0.76	0.086	2.4e-34	60693	European	Surakka (Nat Genet 2015);van Leeuwen (Nat Comm 2015)
rs1883025	9	107664301	HDL_C	T	C	0.25	-0.07	2e-65	187000	European	Willer (Nat Genet 2013)Teslovich (Nature 2010);Surakka (Nat Genet 2015);Kettunen (Nat Genet 2012);Tukiainen (Hum Molec Genet 2012)
rs2575876	9	107665739	Free_C/Est_C	A	G	0.19	-0.14	1.63e-11	8891	European	Kettunen (Nat Genet 2012)
rs1800978	9	107665978	LDL_C	C	G	N.R.	+	3.8e-08	11616	European	Kristiansson (Circ Cardiovasc Genet 2012)
chr9:107690124	9	107690124	HDL_C	G	A	0.324	0.018	3.7e-09	39508	European	van Leeuwen (Nat Comm 2015)
chr9:136141870	9	136141870	TC	T	C	0.193	0.07	1.7e-14	38776	European	van Leeuwen (Nat Comm 2015)
rs550057	9	136146597	LDL_C	T	C	0.26	0.063	5.6e-20	58264	European	Surakka (Nat Genet 2015)
rs507666	9	136149399	TC	A	G	0.18	0.067	2e-18	62014	European	Surakka (Nat Genet 2015)
rs651007	9	136153875	TC	T	C	0.21	2.3	8.7e-21	173037	European	Willer (Nat Genet 2013);Surakka (Nat Genet 2015);Willer (Nat Genet 2008)
rs649129	9	136154304	LDL_C	T	C	0.22	2.05	7.9e-22	176028	European	Willer (Nat Genet 2013);Surakka (Nat Genet 2015);Willer (Nat Genet 2008)
rs635634	9	136155000	LDL_C	T	C	0.21	0.077	2e-41	186785	European	Willer (Nat Genet 2013);Teslovich (Nature 2010)
rs1832007	10	5254847	TG	G	A	0.18	-0.033	2e-12	95070	European	Teslovich (Nature 2010)
rs10904908	10	17260290	TC	G	A	0.43	0.025	3e-11	90000	European	Willer (Nat Genet 2013);Teslovich (Nature 2010)
rs11239544	10	46007533	TC	T	C	0.27	0.037	2.5e-08	59754	European	Surakka (Nat Genet 2015)
rs970548	10	46013277	HDL_C	C	A	0.26	0.026	2e-10	40330	European	Kathiresan (Nat Genet 2009);Middelberg (BMC Med Genet 2011);Surakka (Nat Genet 2015)
rs10822145	10	64934548	TG	C	T	0.5	0.038	6.9e-11	59969	European	Surakka (Nat Genet 2015)
rs10761731	10	65027610	TG	T	A	0.44	-0.031	8e-12	93554	European	Teslovich (Nature 2010);Surakka (Nat Genet 2015)
rs2068888	10	94839642	TG	A	G	0.45	-0.024	2e-11	92000	European	Willer (Nat Genet 2013)
rs1129555	10	113910721	LDL_C	A	G	0.29	1.08	2.1e-09	22562	European	Aulchenko (Nat Genet 2009);Surakka (Nat Genet 2015)
rs2297991	10	113913222	TC	T	C	0.28	0.042	7.6e-10	56974	European	Surakka (Nat Genet 2015)
rs77147124	10	113919124	HDL_C	A	G	0.28	0.039	7.4e-09	60702	European	Surakka (Nat Genet 2015)
rs2255141	10	113933886	TC	A	G	0.3	0.031	7e-16	156000	European	Willer (Nat Genet 2013);Teslovich (Nature 2010);Surakka (Nat Genet 2015)
rs2923084	11	10388782	HDL_C	G	A	0.18	-0.026	5e-08	4128	EastAsian	Hiura (Circ J 2009)
rs10128711	11	18632984	TC	T	C	0.3	-0.031	1e-11	93000	European	Willer (Nat Genet 2013);Kim (Nat Genet 2011)
rs10832963	11	18664241	TC	T	G	0.29	-1.06	2.5e-08	14885	European	Heid (Circ Cardovasc Genet 2008)
rs3136441	11	46743247	HDL_C	C	T	0.18	0.054	7e-29	183314	European	Willer (Nat Genet 2013);Surakka (Nat Genet 2015)
rs7395581	11	47246397	HDL_C	G	A	0.35	0.059	2.2e-21	60689	European	Surakka (Nat Genet 2015)
rs10838681	11	47275064	HDL_C	G	A	0.64	-0.08	1.3e-09	22562	European	Aulchenko (Nat Genet 2009)
rs10838692	11	47345100	HDL_C	C	T	0.36	0.06	8.2e-21	55670	European	Surakka (Nat Genet 2015)
chr11:47676170	11	47676170	HDL_C	A	G	0.495	0.025	2.1e-10	37237	European	van Leeuwen (Nat Comm 2015)
rs17788930	11	47709351	HDL_C	A	G	0.774	0.036	1e-23	188578	European	Do (Nat Genet 2013)
rs4752801	11	47907641	HDL_C	G	A	0.347	-0.04	1.7e-21	35668	European	van Leeuwen (Nat Comm 2015)
rs7395662	11	48518893	HDL_C	G	A	0.61	-0.073	6e-11	86418	European	Teslovich (Nature 2010)
rs11246602	11	51512090	HDL_C	C	T	0.15	0.034	2e-10	40265	European	Teslovich (Nature 2010)
rs174528	11	61543499	MobCH	C	T	0.37	-0.12	8.89e-12	8891	European	Kettunen (Nat Genet 2012)
rs174529	11	61543961	TG	C	T	0.39	0.056	4.2e-20	59884	European	Surakka (Nat Genet 2015);Kettunen (Nat Genet 2012)
rs174530	11	61546592	MobCH	G	A	0.43	-0.12	1.69e-14	8891	European	Kettunen (Nat Genet 2012)
rs108499	11	61547237	MobCH	T	C	0.35	-0.11	7.53e-12	8891	European	Kettunen (Nat Genet 2012)
rs174533	11	61549025	MobCH	A	G	0.42	-0.13	2.31e-15	8891	European	Kettunen (Nat Genet 2012)
rs174534	11	61549458	MobCH	G	A	0.35	-0.11	4.62e-12	8891	European	Kettunen (Nat Genet 2012)
rs174535	11	61551356	MobCH	C	T	0.42	-0.13	3.16e-16	8891	European	Kettunen (Nat Genet 2012)
rs174536	11	61551927	MobCH	C	A	0.42	-0.13	1.5e-15	8891	European	Kettunen (Nat Genet 2012)
rs174537	11	61552680	MobCH	T	G	0.42	-0.13	1.7e-15	8891	European	Kettunen (Nat Genet 2012)
chr11:61557803	11	61557803	TC	C	T	0.359	-0.071	6.8e-19	35790	European	van Leeuwen (Nat Comm 2015);Kettunen (Nat Genet 2012)
rs102274	11	61557826	MobCH	C	T	0.42	-0.13	2.06e-15	8891	European	Kettunen (Nat Genet 2012)
rs174538	11	61560081	MobCH	A	G	0.35	-0.12	1.23e-12	8891	European	Kettunen (Nat Genet 2012)
rs4246215	11	61564299	MobCH	T	G	0.45	-0.13	2.55e-15	8891	European	Kettunen (Nat Genet 2012)
rs174541	11	61565908	MobCH	C	T	0.44	-0.13	7.42e-16	8891	European	Kettunen (Nat Genet 2012)
rs174544	11	61567753	MobCH	A	C	0.37	-0.12	3.32e-13	8891	European	Kettunen (Nat Genet 2012)
rs174545	11	61569306	MobCH	G	C	0.44	-0.13	1.22e-15	8891	European	Kettunen (Nat Genet 2012)
rs174546	11	61569830	TC	T	C	0.36	-0.051	2e-39	186000	European	Willer (Nat Genet 2013);Teslovich (Nature 2010);Surakka (Nat Genet 2015);Kettunen (Nat Genet 2012)
rs174547	11	61570783	MobCH	C	T	0.42	-0.13	1.15e-15	8891	European	Kettunen (Nat Genet 2012);Teslovich (Nature 2010);Willer (Nat Genet 2013);Dumitrescu (PLoS Genet 2011)
rs174548	11	61571348	MobCH	G	C	0.4	-0.12	4.62e-14	8891	European	Kettunen (Nat Genet 2012)
rs174549	11	61571382	MobCH	A	G	0.4	-0.12	4.28e-14	8891	European	Kettunen (Nat Genet 2012)
rs174550	11	61571478	TC	T	C	0.62	0.061	7.6e-24	60912	European	Surakka (Nat Genet 2015);Willer (Nat Genet 2013);Kettunen (Nat Genet 2012)
rs174551	11	61573684	LDL_C	T	C	0.63	0.067	2.2e-27	58297	European	Surakka (Nat Genet 2015)
rs174553	11	61575158	MobCH	G	A	0.42	-0.13	8.6e-16	8891	European	Kettunen (Nat Genet 2012)
rs174554	11	61579463	TC	A	G	0.63	0.062	5.1e-24	60915	European	Surakka (Nat Genet 2015);Kettunen (Nat Genet 2012)
rs174555	11	61579760	MobCH	C	T	0.4	-0.12	3.15e-14	8891	European	Kettunen (Nat Genet 2012)
rs174556	11	61580635	MobCH	T	C	0.4	-0.12	5.33e-14	8891	European	Kettunen (Nat Genet 2012)
rs174559	11	61581656	MobCH	A	G	0.33	-0.11	1.53e-11	8891	European	Kettunen (Nat Genet 2012)
rs174560	11	61581764	MobCH	C	T	0.4	-0.12	4.11e-14	8891	European	Kettunen (Nat Genet 2012)
rs174561	11	61582708	MobCH	C	T	0.42	-0.13	1.73e-15	8891	European	Kettunen (Nat Genet 2012)
rs174562	11	61585144	MobCH	G	A	0.42	-0.13	1.42e-15	8891	European	Kettunen (Nat Genet 2012)
rs174566	11	61592362	MobCH	G	A	0.42	-0.13	2.41e-15	8891	European	Kettunen (Nat Genet 2012)
rs174568	11	61593816	MobCH	T	C	0.42	-0.13	1.44e-15	8891	European	Kettunen (Nat Genet 2012)
rs99780	11	61596633	MobCH	T	C	0.42	-0.13	1.59e-15	8891	European	Kettunen (Nat Genet 2012)
rs174570	11	61597212	LDL_C	G	A	0.83	0.11	4.4e-13	96598	European	Teslovich (Nature 2010);Kettunen (Nat Genet 2012)
rs1535	11	61597972	MobCH	G	A	0.42	-0.13	1.57e-15	8891	European	Kettunen (Nat Genet 2012)
rs174574	11	61600342	MobCH	C	A	0.58	0.13	1.67e-15	8891	European	Kettunen (Nat Genet 2012)
rs174576	11	61603510	MobCH	A	C	0.42	-0.13	1.96e-15	8891	European	Kettunen (Nat Genet 2012);van Leeuwen (Nat Comm 2015)
rs174577	11	61604814	MobCH	A	C	0.42	-0.13	2.44e-15	8891	European	Kettunen (Nat Genet 2012)
rs174578	11	61605499	MobCH	A	T	0.42	-0.13	1.86e-15	8891	European	Kettunen (Nat Genet 2012)
rs174580	11	61606642	MobCH	G	A	0.42	-0.13	1.08e-15	8891	European	Kettunen (Nat Genet 2012)
rs174581	11	61606683	MobCH	A	G	0.42	-0.13	9.45e-16	8891	European	Kettunen (Nat Genet 2012)
rs174583	11	61609750	LDL_C	C	T	0.62	0.063	1.1e-22	53226	European	Surakka (Nat Genet 2015);Willer (Nat Genet 2013);Kettunen (Nat Genet 2012)
rs174584	11	61610750	MobCH	A	G	0.42	-0.13	1.3e-15	8891	European	Kettunen (Nat Genet 2012)
rs174592	11	61618608	MobCH	G	A	0.39	-0.14	4.07e-15	8891	European	Kettunen (Nat Genet 2012)
rs174594	11	61619829	MobCH	A	C	0.58	0.13	6.6e-15	8891	European	Kettunen (Nat Genet 2012)
rs174598	11	61621194	MobCH	A	G	0.35	-0.13	4.78e-13	8891	European	Kettunen (Nat Genet 2012)
rs174599	11	61621556	MobCH	C	G	0.41	-0.14	4.17e-15	8891	European	Kettunen (Nat Genet 2012)
rs174600	11	61622227	MobCH	C	T	0.33	-0.13	7.87e-13	8891	European	Kettunen (Nat Genet 2012)
rs174601	11	61623140	HDL_C	T	C	0.36	-0.73	1.5e-22	177000	European	Willer (Nat Genet 2013);Teslovich (Nature 2010);Kettunen (Nat Genet 2012);Surakka (Nat Genet 2015)
rs2526678	11	61623793	Gp/TC	A	G	0.2	0.14	2.17e-10	8891	European	Kettunen (Nat Genet 2012)
rs97384	11	61624181	MobCH	C	T	0.58	0.13	5.28e-13	8891	European	Kettunen (Nat Genet 2012)
rs174616	11	61629122	MobCH	A	G	0.45	-0.1	1.79e-10	8891	European	Kettunen (Nat Genet 2012)
rs174626	11	61637057	MobCH	A	G	0.55	0.1	6.54e-11	8891	European	Kettunen (Nat Genet 2012)
rs174448	11	61639573	MobCH	A	G	0.62	0.11	2.48e-12	8891	European	Kettunen (Nat Genet 2012)
rs174449	11	61640379	MobCH	A	G	0.63	0.1	1.63e-10	8891	European	Kettunen (Nat Genet 2012)
rs174450	11	61641542	MobCH	T	G	0.55	0.1	1.82e-10	8891	European	Kettunen (Nat Genet 2012)
rs174468	11	61663691	MobCH	A	G	0.36	0.13	4.93e-12	8891	European	Kettunen (Nat Genet 2012)
rs174471	11	61670037	MobCH	T	C	0.38	0.12	4.89e-11	8891	European	Kettunen (Nat Genet 2012)
rs174476	11	61674118	MobCH	T	C	0.37	0.12	2.68e-11	8891	European	Kettunen (Nat Genet 2012)
rs174478	11	61678576	MobCH	T	G	0.65	-0.12	6.61e-13	8891	European	Kettunen (Nat Genet 2012)
rs12801636	11	65391317	HDL_C	A	G	0.23	0.024	3e-08	12300	European	Willer (Nat Genet 2008)
rs499974	11	75455021	HDL_C	A	C	0.19	-0.026	1e-08	19629	European	Kathiresan (Nat Genet 2009);Willer (Nat Genet 2008); Waterworth (Arterioscler Thromb Vasc Biol 2010)
rs579674	11	116528224	M_VLDL_C	G	T	0.21	0.13	2.02e-10	8891	European	Kettunen (Nat Genet 2012)
rs509728	11	116533167	M_VLDL_CE	C	G	0.08	0.24	6.07e-15	8891	European	Kettunen (Nat Genet 2012)
rs12806224	11	116552815	S_VLDL_P	C	T	0.22	0.13	1.1e-10	8891	European	Kettunen (Nat Genet 2012)
rs57984552	11	116566672	M_VLDL_C	T	A	0.24	0.13	2.53e-11	8891	European	Kettunen (Nat Genet 2012)
rs11216107	11	116579663	S_VLDL_L	C	T	0.33	0.12	6.31e-12	8891	European	Kettunen (Nat Genet 2012)
rs4938302	11	116584504	S_VLDL_P	T	C	0.7	-0.12	1.41e-11	8891	European	Kettunen (Nat Genet 2012)
rs4938303	11	116584987	TG	T	C	0.75	-0.067	3.6e-25	178000	European	Willer (Nat Genet 2013);Kathiresan (Nat Genet 2008);Kettunen (Nat Genet 2012)
rs7350481	11	116586283	S_VLDL_P	C	T	0.92	-0.23	1.97e-15	8891	European	Kettunen (Nat Genet 2012)
rs12272004	11	116603724	TG	C	A	0.93	-0.181	5.3e-13	96598	European	Teslovich (Nature 2010)
rs1558860	11	116607368	S_VLDL_P	C	A	0.91	-0.23	3.88e-15	8891	European	Kettunen (Nat Genet 2012)
rs1558861	11	116607437	S_VLDL_P	T	C	0.92	-0.23	3.92e-15	8891	European	Kettunen (Nat Genet 2012)
rs9326246	11	116611733	S_VLDL_P	G	C	0.92	-0.23	1.49e-15	8891	European	Kettunen (Nat Genet 2012)
rs11216126	11	116617240	HDL_C	C	A	0.2	0.032	2.6e-34	185000	European	Willer (Nat Genet 2013);Teslovich (Nature 2010); Aulchenko (Nat Genet 2009); Sabatti (Nat Genet 2009); Kristiansson (Circ Cardiovasc Genet 2012)
rs28927680	11	116619073	TG	C	G	0.93	-0.12	2.88e-38	24258	European	Dumitrescu (PLoS Genet 2011);Willer (Nat Genet 2013)
rs180327	11	116623659	S_VLDL_PL	T	C	0.6	-0.1	1.23e-10	8891	European	Kettunen (Nat Genet 2012)
rs6589564	11	116624153	S_VLDL_P	G	C	0.91	-0.23	9.4e-16	8891	European	Kettunen (Nat Genet 2012)
rs7930786	11	116624727	S_VLDL_P	G	C	0.92	-0.23	9.51e-16	8891	European	Kettunen (Nat Genet 2012)
rs11825181	11	116626258	TG_Blood Pressure (TG_BP)	A	G	0.068	0.32	3e-09	22161	European	Kraja (Diabetes 2011)
rs3825041	11	116631707	S_VLDL_P	C	T	0.92	-0.23	8.03e-16	8891	European	Kettunen (Nat Genet 2012)
rs11820589	11	116633862	TG	A	G	0.063	22.8	9.2e-09	5643	European	Holmen (Nat Genet 2014)
rs79624460	11	116635282	TG	T	C	0.083	-0.102	4.8e-12	6832	African-American	Wu (PLoS Genet 2013)
rs10790162	11	116639104	S_VLDL_P	G	A	0.92	-0.24	2.67e-16	8891	European	Kettunen (Nat Genet 2012);Kraja (Diabetes 2011)
rs6589565	11	116640237	S_VLDL_P	G	A	0.91	-0.23	5.89e-16	8891	European	Kettunen (Nat Genet 2012)
rs2160669	11	116647607	S_VLDL_P	T	C	0.92	-0.24	3.03e-16	8891	European	Kettunen (Nat Genet 2012)
rs964184	11	116648917	TG	C	G	0.84	-0.234	7e-224	187272	European	Willer (Nat Genet 2013);Surakka (Nat Genet 2015);Dumitrescu (PLoS Genet 2011);Teslovich (Nature 2010);van Leeuwen (Nat Comm 2015);Weissglas-Volkov (J Med Gen 2013);Coram (Am J Hum Gen 2013);Willer (Nat Genet 2013);Kathiresan (Nat Genet 2009)
rs11823543	11	116649135	Serum_TG/Glc	A	G	0.06	0.22	1.95e-10	8891	European	Kettunen (Nat Genet 2012);Kraja (Diabetes 2011)
rs17120029	11	116650118	Serum_TG/Glc	T	C	0.06	0.22	2.09e-10	8891	European	Kettunen (Nat Genet 2012)
rs11604424	11	116651115	Gp/Serum_TG	T	C	0.75	0.15	6.36e-16	8891	European	Kettunen (Nat Genet 2012)
rs12286037	11	116652207	TG	T	C	0.9	25.82	1e-26	179000	European	Willer (Nat Genet 2013);Teslovich (Nature 2010);Kettunen (Nat Genet 2012)
rs6589566	11	116652423	S_VLDL_P	A	G	0.91	-0.24	3.61e-17	8891	European	Kettunen (Nat Genet 2012);Coram (Am J Hum Gen 2013);Teslovich (Nature 2010)
rs2075290	11	116653296	S_VLDL_P	T	C	0.92	-0.24	3.34e-16	8891	European	Kettunen (Nat Genet 2012);Kraja (Diabetes 2011)
rs603446	11	116654435	TG	T	C	0.23	-0.088	1.8e-86	187056	European	Willer (Nat Genet 2013)
rs35120633	11	116655600	TG	A	G	0.061	24.8	4.1e-10	5643	European	Holmen (Nat Genet 2014)
rs10750096	11	116656788	S_VLDL_P	A	C	0.92	-0.24	3.39e-16	8891	European	Kettunen (Nat Genet 2012)
rs3741298	11	116657561	Gp/Serum_TG	T	C	0.77	0.16	1.8e-17	8891	European	Kettunen (Nat Genet 2012);Willer (Nat Genet 2008)
rs2266788	11	116660686	S_VLDL_P	A	G	0.91	-0.24	4.22e-17	8891	European	Kettunen (Nat Genet 2012);Kraja (Diabetes 2011)
rs2072560	11	116661826	S_VLDL_P	C	T	0.92	-0.27	2.3e-17	8891	European	Kettunen (Nat Genet 2012)
rs3135506	11	116662407	TG	C	G	0.06	0.13	2.59e-33	24258	European	Dumitrescu (PLoS Genet 2011);Wu (PLoS Genet 2013)
rs651821	11	116662579	TG	C	T	0.27	N.R.	9.2e-26	178000	European	Willer (Nat Genet 2013);Teslovich (Nature 2010);Kathiresan (Nat Genet 2009);Willer (Nat Genet 2008); Waterworth (Arterioscler Thromb Vasc Biol 2010);Kettunen et al (Nat Genet 2012);Kettunen (Nat Genet 2012)
rs662799	11	116663707	S_VLDL_PL	A	G	0.92	-0.26	4.86e-17	8891	European	Kettunen (Nat Genet 2012);Willer (Nat Genet 2013);Teslovich (Nature 2010)
rs10750097	11	116664040	S_VLDL_P	A	G	0.78	-0.18	4.41e-16	8891	European	Kettunen (Nat Genet 2012)
rs9804646	11	116665079	TC	T	C	N.R.	-	6.7e-12	93855	European	Teslovich (Nature 2010)
rs6589569	11	116671476	S_VLDL_PL	C	T	0.84	-0.15	1.22e-10	8891	European	Kettunen (Nat Genet 2012)
rs9667814	11	116671823	S_VLDL_PL	G	C	0.84	-0.15	1.26e-10	8891	European	Kettunen (Nat Genet 2012)
rs9666150	11	116671824	S_VLDL_PL	C	T	0.84	-0.15	1.21e-10	8891	European	Kettunen (Nat Genet 2012)
rs11216140	11	116672013	S_VLDL_PL	C	T	0.84	-0.15	1.28e-10	8891	European	Kettunen (Nat Genet 2012)
rs7396835	11	116684028	TG	T	C	0.32	0.23	1.2e-09	22562	European	Aulchenko (Nat Genet 2009)
11-116204599	11	116699389	S_VLDL_PL	G	A	0.9	-0.27	5.44e-15	8891	European	Kettunen (Nat Genet 2012)
rs5128	11	116703640	Gp/Serum_TG	G	C	0.12	-0.17	1.58e-11	8891	European	Kettunen (Nat Genet 2012)
chr11:116705516	11	116705516	HDL_C	G	A	0.289	0.03	5.6e-15	35785	European	van Leeuwen (Nat Comm 2015)
11-116210778	11	116705568	Gp/Serum_TG	T	G	0.88	0.19	2.64e-11	8891	European	Kettunen (Nat Genet 2012)
rs5072	11	116707583	Gp/Serum_TG	G	A	0.88	0.17	2.37e-11	8891	European	Kettunen (Nat Genet 2012)
rs2070665	11	116707684	Gp/Serum_TG	G	A	0.88	0.17	3.06e-11	8891	European	Kettunen (Nat Genet 2012)
rs12225230	11	116728630	HDL_C	C	G	N.R.	+	6.8e-33	185000	European	Willer (Nat Genet 2013)
11-116287412	11	116782202	S_VLDL_PL	G	A	0.07	0.28	1.44e-13	8891	European	Kettunen (Nat Genet 2012)
rs55703909	11	116984866	M_VLDL_CE	A	G	0.1	0.19	4.34e-11	8891	European	Kettunen (Nat Genet 2012)
chr11:117052107	11	117052107	TC	A	G	0.02	-0.18	1e-09	24889	European	van Leeuwen (Nat Comm 2015)
chr11:117075566	11	117075566	TG	T	C	0.071	0.052	8.4e-09	10651	European	van Leeuwen (Nat Comm 2015)
rs11603023	11	118486067	TC	T	C	0.42	0.022	1e-08	19438	European	Willer (Nat Genet 2008); Sandhu (Lancet 2008)
rs7941030	11	122522375	HDL_C	C	T	0.39	0.027	1e-14	100098	European	Teslovich (Nature 2010);Surakka (Nat Genet 2015)
rs7128198	11	122526601	TC	T	C	0.38	0.036	4e-09	61132	European	Surakka (Nat Genet 2015)
rs7115089	11	122530591	HDL_C	G	C	0.37	0.31	2.7e-08	12545	EastAsian	Kim (Nat Genet 2011);Surakka (Nat Genet 2015)
rs59379014	11	126228000	LDL_C	T	C	0.07	0.082	8.8e-11	53191	European	Surakka (Nat Genet 2015)
rs11220462	11	126243952	LDL_C	A	G	0.14	0.059	7e-21	173044	European	Willer (Nat Genet 2013);Teslovich (Nature 2010); Aulchenko (Nat Genet 2009);Surakka (Nat Genet 2015)
rs4307732	11	126244955	LDL_C	A	G	0.11	0.067	2.8e-12	58247	European	Surakka (Nat Genet 2015)
rs11220463	11	126248211	TC	T	A	0.14	0.042	1.6e-06	56932	European	Surakka (Nat Genet 2015)
rs4883201	12	9082581	TC	G	A	0.12	-0.035	2e-09	22562	European	Aulchenko (Nat Genet 2009)
rs7134375	12	20473758	HDL_C	A	C	0.43	0.021	1e-08	19372	European	Willer (Nat Genet 2008); Sandhu (Lancet 2008)
rs11613352	12	57792580	TG	T	C	0.26	-0.028	9e-14	97559	European	Teslovich (Nature 2010);Surakka (Nat Genet 2015)
rs61352607	12	57839173	TG	G	T	0.73	0.038	1.2e-08	59961	European	Surakka (Nat Genet 2015)
rs3741414	12	57844049	HDL_C	T	C	0.24	0.46	1.6e-08	17797	European	Aulchenko (Nat Genet 2009);Surakka (Nat Genet 2015)
rs2338104	12	109895168	HDL_C	C	G	0.45	-0.07	1e-10	81126	European	Teslovich (Nature 2010)
rs2241208	12	109962795	HDL_C	C	G	0.51	0.036	8.6e-10	60769	European	Surakka (Nat Genet 2015)
rs7134594	12	110000193	HDL_C	C	T	0.48	-0.035	2e-13	97148	European	Teslovich (Nature 2010);Surakka (Nat Genet 2015)
rs12229654	12	111414461	HDL_C	T	G	0.14	-0.028	3.4e-23	177762	European	Willer (Nat Genet 2013)
rs11065987	12	112072424	TC	G	A	0.41	-0.031	2e-16	158000	European	Willer (Nat Genet 2013);Teslovich (Nature 2010)
rs2074356	12	112645401	HDL_C	C	T	0.15	-0.035	7e-37	186000	European	Willer (Nat Genet 2013);Teslovich (Nature 2010)
rs2650000	12	121388962	LDL_C	A	C	0.36	0.07	2e-08	16056	European	Waterworth (Arterioscler Thromb Vasc Biol 2010)
rs1169288	12	121416650	LDL_C	C	A	0.34	0.038	6e-21	174000	European	Willer (Nat Genet 2013);Teslovich (Nature 2010);Surakka (Nat Genet 2015)
rs1169314	12	121443116	LDL_C	G	A	0.3	0.037	2.3e-08	56273	European	Surakka (Nat Genet 2015)
rs2264750	12	121450165	TC	T	C	0.3	0.042	6.5e-11	60044	European	Surakka (Nat Genet 2015)
rs11057244	12	123773263	HDL_C	C	G	N.R.	+	4.6e-09	21312	European	Kathiresan (Nat Genet 2008)
chr12:123790007	12	123790007	HDL_C	C	T	0.076	0.03	9.9e-09	38558	European	van Leeuwen (Nat Comm 2015)
rs4759375	12	123796238	HDL_C	T	C	0.08	0.056	3e-08	11932	European	Willer (Nat Genet 2008)
rs4765127	12	124460167	HDL_C	T	G	0.34	0.44	2.9e-10	38561	European	Kathiresan (Nat Genet 2009);Kim (Nat Genet 2011)
rs12310367	12	124486678	TG	G	A	0.34	-2.42	1.2e-08	17797	European	Aulchenko (Nat Genet 2009)
chr12:125259888	12	125259888	HDL_C	A	G	0.352	0.019	7.6e-09	36584	European	van Leeuwen (Nat Comm 2015)
rs838880	12	125261593	HDL_C	C	T	0.34	0.048	6e-32	185000	European	Willer (Nat Genet 2013);Teslovich (Nature 2010);Surakka (Nat Genet 2015)
rs838886	12	125264287	HDL_C	T	G	0.35	0.058	2e-18	58637	European	Surakka (Nat Genet 2015)
rs4942486	13	32953388	LDL_C	T	C	0.48	0.024	2e-11	91483	European	Teslovich (Nature 2010)
rs11621792	14	24871926	LDL_C	T	C	0.42	0.037	1.7e-08	53119	European	Surakka (Nat Genet 2015)
rs6573778	14	24872209	TC	T	C	N.R.	+	2e-08	17543	European	Waterworth (Arterioscler Thromb Vasc Biol 2010); Middelberg (BMC Med Genet 2011)
rs2332328	14	24883058	LDL_C	T	C	0.46	0.033	2.6e-07	53123	European	Surakka (Nat Genet 2015)
rs8017377	14	24883887	LDL_C	A	G	0.46	0.03	3e-15	102000	European	Willer (Nat Genet 2013)
rs45490496	14	105272678	HDL_C	A	T	0.39	0.038	8.2e-09	55349	European	Surakka (Nat Genet 2015)
rs4983559	14	105277209	HDL_C	G	A	0.4	0.02	1e-08	18422	European	Willer (Nat Genet 2008);Surakka (Nat Genet 2015)
rs2412710	15	42683787	TG	A	G	0.04	0.099	2e-11	91000	European	Willer (Nat Genet 2013);Teslovich (Nature 2010);Kathiresan (Nat Genet 2009);Willer et el. (Nat Genet 2008); Kristiansson (Circ Cardiovasc Genet 2012);Surakka (Nat Genet 2015)
rs62020698	15	43237414	TG	T	C	0.07	0.091	3.6e-10	54834	European	Surakka (Nat Genet 2015)
rs2929282	15	44245931	TG	T	A	0.07	0.072	2e-09	22562	European	Aulchenko (Nat Genet 2009);Surakka (Nat Genet 2015)
rs138570705	15	44266730	TG	A	G	0.02	0.115	3e-08	59540	European	Surakka (Nat Genet 2015)
rs10518933	15	58086464	L_HDL_L/S_HDL_L	C	T	0.19	-0.13	2.24e-10	8891	European	Kettunen (Nat Genet 2012)
rs11635486	15	58361124	XL_HDL_TG	A	G	0.12	0.21	2.39e-12	8891	European	Kettunen (Nat Genet 2012)
rs16953360	15	58448194	XL_HDL_TG	G	A	0.07	0.32	2.73e-22	8891	European	Kettunen (Nat Genet 2012)
rs12441883	15	58456850	XL_HDL_TG	A	G	0.14	0.21	5.1e-18	8891	European	Kettunen (Nat Genet 2012)
rs16939881	15	58471979	XL_HDL_TG	G	C	0.94	-0.35	6.49e-24	8891	European	Kettunen (Nat Genet 2012)
rs2077737	15	58478950	XL_HDL_TG	C	T	0.32	0.12	4.4e-13	8891	European	Kettunen (Nat Genet 2012)
rs12900815	15	58485682	XL_HDL_TG	T	C	0.32	0.13	2.52e-14	8891	European	Kettunen (Nat Genet 2012)
rs11857136	15	58500779	XL_HDL_TG	A	T	0.7	-0.13	2.66e-12	8891	European	Kettunen (Nat Genet 2012)
rs56227417	15	58500956	XL_HDL_TG	C	T	0.71	-0.13	7.26e-13	8891	European	Kettunen (Nat Genet 2012)
rs4350519	15	58501146	XL_HDL_TG	G	C	0.7	-0.13	1.19e-12	8891	European	Kettunen (Nat Genet 2012)
rs1618701	15	58501282	XL_HDL_TG	A	T	0.71	-0.13	1.27e-12	8891	European	Kettunen (Nat Genet 2012)
rs7180071	15	58502472	XL_HDL_TG	G	A	0.71	-0.13	1.8e-12	8891	European	Kettunen (Nat Genet 2012)
rs2414551	15	58503128	XL_HDL_TG	C	T	0.71	-0.13	3.59e-12	8891	European	Kettunen (Nat Genet 2012)
rs1663253	15	58504678	XL_HDL_TG	T	C	0.68	-0.11	8.9e-11	8891	European	Kettunen (Nat Genet 2012)
rs2017566	15	58505040	XL_HDL_TG	C	T	0.68	-0.11	8.6e-11	8891	European	Kettunen (Nat Genet 2012)
rs1663254	15	58513993	XL_HDL_TG	A	G	0.71	-0.12	1.81e-11	8891	European	Kettunen (Nat Genet 2012)
rs1663255	15	58514242	XL_HDL_TG	T	C	0.71	-0.12	1.85e-11	8891	European	Kettunen (Nat Genet 2012)
rs62000518	15	58546178	XL_HDL_TG	C	T	0.31	-0.12	1.02e-10	8891	European	Kettunen (Nat Genet 2012)
rs56314708	15	58546697	XL_HDL_TG	A	C	0.31	-0.11	1.09e-10	8891	European	Kettunen (Nat Genet 2012)
rs7183294	15	58546728	XL_HDL_TG	C	T	0.42	-0.11	4.29e-11	8891	European	Kettunen (Nat Genet 2012)
rs7182541	15	58547018	XL_HDL_TG	T	C	0.31	-0.12	6.32e-11	8891	European	Kettunen (Nat Genet 2012)
rs6493993	15	58547457	XL_HDL_TG	G	T	0.41	-0.11	7.74e-11	8891	European	Kettunen (Nat Genet 2012)
rs7173510	15	58549361	XL_HDL_TG	T	C	0.4	-0.11	1.37e-10	8891	European	Kettunen (Nat Genet 2012)
rs7179597	15	58549515	XL_HDL_TG	G	T	0.4	-0.11	1.37e-10	8891	European	Kettunen (Nat Genet 2012)
rs7179609	15	58549532	XL_HDL_TG	C	T	0.4	-0.11	1e-10	8891	European	Kettunen (Nat Genet 2012)
rs7178320	15	58549547	XL_HDL_TG	T	C	0.4	-0.11	1.33e-10	8891	European	Kettunen (Nat Genet 2012)
rs7178332	15	58549559	XL_HDL_TG	T	C	0.4	-0.11	1.37e-10	8891	European	Kettunen (Nat Genet 2012)
rs7178337	15	58549612	XL_HDL_TG	C	A	0.4	-0.11	1.37e-10	8891	European	Kettunen (Nat Genet 2012)
rs7178779	15	58549619	XL_HDL_TG	T	G	0.4	-0.11	1.37e-10	8891	European	Kettunen (Nat Genet 2012)
rs34458264	15	58549743	XL_HDL_TG	T	C	0.4	-0.11	1.36e-10	8891	European	Kettunen (Nat Genet 2012)
rs62000520	15	58549784	XL_HDL_TG	G	A	0.4	-0.11	1.36e-10	8891	European	Kettunen (Nat Genet 2012)
rs17240685	15	58549812	XL_HDL_TG	A	T	0.4	-0.11	1.36e-10	8891	European	Kettunen (Nat Genet 2012)
15-56337244	15	58549952	XL_HDL_TG	T	G	0.31	-0.11	1.22e-10	8891	European	Kettunen (Nat Genet 2012)
rs35348919	15	58549954	XL_HDL_TG	C	A	0.4	-0.11	1.36e-10	8891	European	Kettunen (Nat Genet 2012)
rs34890778	15	58549978	XL_HDL_TG	G	A	0.4	-0.11	1.35e-10	8891	European	Kettunen (Nat Genet 2012)
15-56337279	15	58549987	XL_HDL_TG	G	A	0.4	-0.11	1.35e-10	8891	European	Kettunen (Nat Genet 2012)
15-56337285	15	58549993	XL_HDL_TG	T	C	0.4	-0.11	1.35e-10	8891	European	Kettunen (Nat Genet 2012)
rs34149555	15	58550000	XL_HDL_TG	A	G	0.4	-0.11	1.35e-10	8891	European	Kettunen (Nat Genet 2012)
rs2414561	15	58551444	XL_HDL_TG	T	C	0.4	-0.11	1.53e-11	8891	European	Kettunen (Nat Genet 2012)
rs17821159	15	58557062	XL_HDL_TG	G	A	0.3	-0.11	1.89e-10	8891	European	Kettunen (Nat Genet 2012)
rs7179726	15	58558746	XL_HDL_TG	T	C	0.4	-0.11	6.18e-11	8891	European	Kettunen (Nat Genet 2012)
rs12904030	15	58562270	XL_HDL_TG	T	C	0.41	-0.11	3.89e-11	8891	European	Kettunen (Nat Genet 2012)
rs4542601	15	58565099	XL_HDL_TG	T	C	0.41	-0.11	4.5e-11	8891	European	Kettunen (Nat Genet 2012)
15-56354127	15	58566835	XL_HDL_TG	A	T	0.3	0.13	9.58e-11	8891	European	Kettunen (Nat Genet 2012)
rs8042351	15	58568093	XL_HDL_TG	C	T	0.41	-0.11	6.14e-11	8891	European	Kettunen (Nat Genet 2012)
15-56355663	15	58568371	XL_HDL_TG	A	C	0.01	0.55	3.35e-13	8891	European	Kettunen (Nat Genet 2012)
rs11854242	15	58571910	XL_HDL_TG	T	C	0.2	-0.14	1.05e-11	8891	European	Kettunen (Nat Genet 2012);van Leeuwen (Nat Comm 2015)
rs11854318	15	58571982	XL_HDL_TG	A	G	0.21	-0.14	6.05e-12	8891	European	Kettunen (Nat Genet 2012)
rs1711037	15	58576350	XL_HDL_TG	T	A	0.16	0.16	1.7e-13	8891	European	Kettunen (Nat Genet 2012)
rs12903590	15	58577777	XL_HDL_TG	T	A	0.16	0.16	2.16e-13	8891	European	Kettunen (Nat Genet 2012)
15-56367387	15	58580095	XL_HDL_TG	A	T	0.11	-0.21	1.75e-10	8891	European	Kettunen (Nat Genet 2012)
rs12910051	15	58580525	XL_HDL_TG	G	A	0.16	0.16	1.19e-13	8891	European	Kettunen (Nat Genet 2012)
rs7179728	15	58581426	XL_HDL_TG	C	G	0.16	0.16	3.73e-13	8891	European	Kettunen (Nat Genet 2012)
rs938507	15	58582034	XL_HDL_TG	A	G	0.16	0.16	4.35e-13	8891	European	Kettunen (Nat Genet 2012)
rs1318175	15	58586129	XL_HDL_TG	T	C	0.17	-0.17	7.05e-15	8891	European	Kettunen (Nat Genet 2012)
rs1711041	15	58590621	XL_HDL_TG	T	G	0.17	0.14	9.29e-11	8891	European	Kettunen (Nat Genet 2012)
rs12899879	15	58591415	XL_HDL_TG	C	T	0.17	0.14	9.23e-11	8891	European	Kettunen (Nat Genet 2012)
rs28697198	15	58593566	XL_HDL_TG	T	C	0.02	0.52	3.2e-12	8891	European	Kettunen (Nat Genet 2012)
rs557108	15	58641311	XL_HDL_TG	T	C	0.99	-0.54	9.56e-14	8891	European	Kettunen (Nat Genet 2012)
rs4622454	15	58646332	XL_HDL_TG	T	C	0.44	0.12	1.77e-14	8891	European	Kettunen (Nat Genet 2012)
rs8037464	15	58649477	LDL_D	C	T	0.37	0.12	2.65e-11	8891	European	Kettunen (Nat Genet 2012)
rs8036597	15	58649668	XL_HDL_TG	G	C	0.45	0.13	3.63e-14	8891	European	Kettunen (Nat Genet 2012)
rs17821268	15	58651297	XL_HDL_TG	C	T	0.45	0.14	3.34e-16	8891	European	Kettunen (Nat Genet 2012)
15-56441595	15	58654303	XL_HDL_TG	C	G	0.44	0.11	4.83e-11	8891	European	Kettunen (Nat Genet 2012)
rs62001733	15	58662090	XL_HDL_TG	C	A	0.44	0.11	3.8e-11	8891	European	Kettunen (Nat Genet 2012)
rs567496	15	58665952	LDL_D	A	T	0.35	-0.13	1.78e-13	8891	European	Kettunen (Nat Genet 2012)
rs479084	15	58666087	LDL_D	G	C	0.36	-0.13	4.05e-13	8891	European	Kettunen (Nat Genet 2012)
rs473422	15	58666341	XL_HDL_TG	T	C	0.31	-0.13	5.33e-14	8891	European	Kettunen (Nat Genet 2012)
rs1838504	15	58666410	XL_HDL_TG	T	A	0.53	0.15	9.34e-19	8891	European	Kettunen (Nat Genet 2012)
rs1444938	15	58666425	LDL_D	A	T	0.33	-0.13	6.01e-12	8891	European	Kettunen (Nat Genet 2012)
rs185481	15	58666679	XL_HDL_TG	C	T	0.54	0.15	1.5e-21	8891	European	Kettunen (Nat Genet 2012)
15-56456995	15	58669703	XL_HDL_TG	C	A	0.05	0.4	1.75e-20	8891	European	Kettunen (Nat Genet 2012)
rs4775039	15	58670897	XL_HDL_TG	G	C	0.47	0.27	6.43e-32	8891	European	Kettunen (Nat Genet 2012)
rs10152355	15	58671178	XL_HDL_TG	A	C	0.37	-0.26	2.96e-30	8891	European	Kettunen (Nat Genet 2012)
rs1601933	15	58671559	XL_HDL_TG	T	C	0.44	-0.29	1.16e-46	8891	European	Kettunen (Nat Genet 2012)
rs1601935	15	58671765	XL_HDL_TG	T	G	0.61	-0.3	3.67e-53	8891	European	Kettunen (Nat Genet 2012);Surakka (Nat Genet 2015);van Leeuwen (Nat Comm 2015)
rs12908474	15	58672134	XL_HDL_TG	T	C	0.51	-0.23	6.16e-43	8891	European	Kettunen (Nat Genet 2012)
rs62001736	15	58674051	XL_HDL_TG	A	G	0.34	0.28	8.26e-49	8891	European	Kettunen (Nat Genet 2012)
rs2043082	15	58674308	XL_HDL_TG	A	G	0.43	0.29	8.09e-63	8891	European	Kettunen (Nat Genet 2012)
rs4775041	15	58674695	XL_HDL_TG	C	G	0.32	0.3	1.53e-56	8891	European	Kettunen (Nat Genet 2012);Willer (Nat Genet 2013);Dumitrescu (PLoS Genet 2011);Aulchenko (Nat Genet 2009); Sandhu (Lancet 2008)
15-56463324	15	58676032	XL_HDL_TG	T	A	0.33	0.28	3.36e-48	8891	European	Kettunen (Nat Genet 2012)
rs11858759	15	58676821	XL_HDL_TG	A	G	0.34	0.27	1.02e-49	8891	European	Kettunen (Nat Genet 2012)
rs11071377	15	58677395	XL_HDL_TG	T	A	0.46	-0.26	6.45e-48	8891	European	Kettunen (Nat Genet 2012)
rs10468017	15	58678512	XL_HDL_TG	T	C	0.33	0.31	1.44e-73	8891	European	Kettunen (Nat Genet 2012);Willer (Nat Genet 2013)
rs261290	15	58678720	XL_HDL_TG	C	T	0.61	-0.29	3.12e-64	8891	European	Kettunen (Nat Genet 2012)
rs56358871	15	58679387	XL_HDL_TG	C	G	0.5	-0.26	7.22e-52	8891	European	Kettunen (Nat Genet 2012)
rs7350789	15	58679668	XL_HDL_TG	A	G	0.39	0.29	3.03e-71	8891	European	Kettunen (Nat Genet 2012)
rs261291	15	58680178	HDL_C	C	T	0.37	0.122	6.2e-87	60675	European	Surakka (Nat Genet 2015);Kettunen (Nat Genet 2012);van Leeuwen (Nat Comm 2015)
rs7177289	15	58680184	XL_HDL_TG	T	C	0.39	0.31	5.23e-73	8891	European	Kettunen (Nat Genet 2012)
rs2414577	15	58680638	XL_HDL_TG	C	T	0.43	0.29	6.9e-71	8891	European	Kettunen (Nat Genet 2012)
rs2414578	15	58680639	XL_HDL_TG	C	T	0.43	0.29	6.88e-71	8891	European	Kettunen (Nat Genet 2012)
rs35853021	15	58680643	XL_HDL_TG	T	G	0.39	0.31	7.11e-76	8330	European	Kettunen et al (Nat Genet 2012);Kettunen (Nat Genet 2012)
rs166358	15	58680805	XL_HDL_TG	G	A	0.84	-0.2	4.12e-22	8891	European	Kettunen (Nat Genet 2012)
rs2043085	15	58680954	XL_HDL_TG	C	T	0.57	-0.29	7.14e-71	8891	European	Kettunen (Nat Genet 2012)
15-56468420	15	58681128	XL_HDL_TG	C	A	0.15	0.26	2.2e-29	8891	European	Kettunen (Nat Genet 2012)
rs28698356	15	58681509	XL_HDL_TG	C	G	0.51	-0.27	8.65e-57	8891	European	Kettunen (Nat Genet 2012)
rs2043084	15	58682496	XL_HDL_TG	C	G	0.24	0.22	2.45e-31	8891	European	Kettunen (Nat Genet 2012)
rs1825955	15	58682783	XL_HDL_TG	A	C	0.18	0.23	4.86e-26	8891	European	Kettunen (Nat Genet 2012)
rs12185071	15	58683227	XL_HDL_TG	T	C	0.15	0.25	9.77e-29	8891	European	Kettunen (Nat Genet 2012)
rs1532085	15	58683366	HDL_C	A	G	0.4	0.107	1e-188	187219	European	Willer (Nat Genet 2013);Surakka (Nat Genet 2015);Tukiainen (Hum Molec Genet 2012);Kettunen (Nat Genet 2012);Holmen (Nat Genet 2014)
rs12185072	15	58683410	XL_HDL_TG	T	C	0.19	0.21	4.34e-25	8891	European	Kettunen (Nat Genet 2012)
rs12905732	15	58683542	XL_HDL_TG	C	G	0.17	0.23	7.72e-23	8891	European	Kettunen (Nat Genet 2012)
rs28594460	15	58683585	XL_HDL_TG	G	A	0.19	0.23	4.66e-26	8891	European	Kettunen (Nat Genet 2012)
rs16940167	15	58683697	XL_HDL_TG	C	T	0.19	0.21	5.54e-25	8891	European	Kettunen (Nat Genet 2012)
rs11853674	15	58684057	XL_HDL_TG	G	A	0.25	0.22	1.07e-30	8891	European	Kettunen (Nat Genet 2012)
rs16940168	15	58684154	XL_HDL_TG	T	A	0.15	0.24	3.11e-28	8891	European	Kettunen (Nat Genet 2012)
rs16940170	15	58684282	XL_HDL_TG	A	G	0.16	0.23	1.7e-26	8891	European	Kettunen (Nat Genet 2012)
rs28495863	15	58684381	XL_HDL_TG	A	G	0.15	0.25	8.46e-28	8891	European	Kettunen (Nat Genet 2012)
rs17821274	15	58684478	XL_HDL_TG	C	T	0.63	-0.11	2.34e-11	8891	European	Kettunen (Nat Genet 2012)
rs12185093	15	58684676	XL_HDL_TG	A	G	0.16	0.24	1.29e-26	8891	European	Kettunen (Nat Genet 2012)
rs4775044	15	58684967	XL_HDL_TG	G	T	0.51	-0.26	2.26e-56	8891	European	Kettunen (Nat Genet 2012)
rs7497636	15	58685631	XL_HDL_TG	T	C	0.16	0.24	1.78e-26	8891	European	Kettunen (Nat Genet 2012)
rs1444942	15	58685813	XL_HDL_TG	C	G	0.16	0.24	1.86e-26	8891	European	Kettunen (Nat Genet 2012)
rs261298	15	58686157	XL_HDL_TG	G	C	0.45	-0.21	1.93e-39	8891	European	Kettunen (Nat Genet 2012)
rs261299	15	58686252	XL_HDL_TG	A	G	0.45	-0.23	7.07e-41	8891	European	Kettunen (Nat Genet 2012)
rs16940174	15	58686338	XL_HDL_TG	A	G	0.16	0.23	1.13e-25	8891	European	Kettunen (Nat Genet 2012)
rs447794	15	58686638	XL_HDL_TG	C	G	0.84	-0.24	2.43e-26	8891	European	Kettunen (Nat Genet 2012)
15-56473983	15	58686691	XL_HDL_TG	T	C	0.16	0.24	2.48e-26	8891	European	Kettunen (Nat Genet 2012)
rs261301	15	58686939	XL_HDL_TG	C	T	0.84	-0.23	6.12e-25	8891	European	Kettunen (Nat Genet 2012)
rs17240832	15	58687370	XL_HDL_TG	G	A	0.18	0.2	1.62e-20	8891	European	Kettunen (Nat Genet 2012)
15-56474757	15	58687465	XL_HDL_TG	T	G	0.13	0.23	1.11e-17	8891	European	Kettunen (Nat Genet 2012)
rs16940181	15	58687524	XL_HDL_TG	C	A	0.16	0.24	3.82e-26	8891	European	Kettunen (Nat Genet 2012)
rs7171102	15	58687530	XL_HDL_TG	A	G	0.25	0.21	6.14e-28	8891	European	Kettunen (Nat Genet 2012)
rs174418	15	58687603	XL_HDL_TG	C	T	0.56	-0.27	7.16e-59	8891	European	Kettunen (Nat Genet 2012)
rs166359	15	58687609	XL_HDL_TG	T	G	0.84	-0.24	3.99e-26	8891	European	Kettunen (Nat Genet 2012)
rs495348	15	58687790	XL_HDL_TG	G	C	0.84	-0.22	2.1e-24	8891	European	Kettunen (Nat Genet 2012)
rs8032310	15	58687862	XL_HDL_TG	A	G	0.16	0.22	1.41e-24	8891	European	Kettunen (Nat Genet 2012)
rs493258	15	58687880	XL_HDL_TG	C	T	0.49	-0.23	5.77e-46	8891	European	Kettunen (Nat Genet 2012)
rs493987	15	58687906	XL_HDL_TG	C	T	0.85	-0.25	1.78e-27	8891	European	Kettunen (Nat Genet 2012)
15-56475451	15	58688159	XL_HDL_TG	G	A	0.08	0.3	8.39e-16	8891	European	Kettunen (Nat Genet 2012)
rs920915	15	58688467	XL_HDL_TG	G	C	0.54	0.23	5.6e-44	8891	European	Kettunen (Nat Genet 2012)
rs920916	15	58688477	XL_HDL_TG	A	G	0.54	0.23	5.68e-44	8891	European	Kettunen (Nat Genet 2012)
rs920917	15	58688478	XL_HDL_TG	C	A	0.16	0.24	6.08e-26	8891	European	Kettunen (Nat Genet 2012)
rs11855284	15	58689187	XL_HDL_TG	C	T	0.22	0.18	1.31e-20	8891	European	Kettunen (Nat Genet 2012)
rs11858481	15	58689197	XL_HDL_TG	T	C	0.25	0.2	8.03e-27	8891	European	Kettunen (Nat Genet 2012)
rs17821298	15	58690738	XL_HDL_TG	A	C	0.24	0.14	1.34e-12	8891	European	Kettunen (Nat Genet 2012)
rs415799	15	58690754	XL_HDL_TG	A	G	0.44	-0.21	2.7e-38	8891	European	Kettunen (Nat Genet 2012)
rs490098	15	58691225	XL_HDL_TG	A	C	0.82	-0.2	5.51e-20	8891	European	Kettunen (Nat Genet 2012)
rs2082149	15	58691389	XL_HDL_TG	A	G	0.18	0.2	5.38e-20	8891	European	Kettunen (Nat Genet 2012)
rs443401	15	58692095	XL_HDL_TG	G	C	0.46	-0.22	1.61e-41	8891	European	Kettunen (Nat Genet 2012)
rs397923	15	58692118	XL_HDL_TG	T	A	0.54	-0.24	4.43e-50	8891	European	Kettunen (Nat Genet 2012)
rs35128881	15	58692148	XL_HDL_TG	T	G	0.24	0.21	1.61e-26	8891	European	Kettunen (Nat Genet 2012)
rs12708454	15	58692202	XL_HDL_TG	C	A	0.34	0.13	2.19e-14	8891	European	Kettunen (Nat Genet 2012)
rs414671	15	58692479	XL_HDL_TG	T	C	0.8	-0.16	6.57e-15	8891	European	Kettunen (Nat Genet 2012)
rs12906722	15	58692715	XL_HDL_TG	T	C	0.25	0.19	1.15e-24	8891	European	Kettunen (Nat Genet 2012)
rs16940204	15	58692936	XL_HDL_TG	T	C	0.23	0.16	1.93e-16	8891	European	Kettunen (Nat Genet 2012)
rs487766	15	58693860	XL_HDL_TG	T	C	0.76	-0.18	3.85e-22	8891	European	Kettunen (Nat Genet 2012)
rs16940212	15	58694020	HDL_C	T	G	0.34	0.022	1.2e-24	178000	European	Willer (Nat Genet 2013);Teslovich (Nature 2010);Kettunen (Nat Genet 2012)
15-56481949	15	58694657	XL_HDL_TG	G	C	0.2	0.16	1.6e-15	8891	European	Kettunen (Nat Genet 2012)
rs16940213	15	58695337	XL_HDL_TG	T	C	0.18	0.19	6.35e-20	8891	European	Kettunen (Nat Genet 2012)
15-56482884	15	58695592	XL_HDL_TG	A	G	0.18	0.19	5.37e-20	8891	European	Kettunen (Nat Genet 2012)
15-56483240	15	58695948	XL_HDL_TG	G	C	0.18	0.19	1.09e-19	8891	European	Kettunen (Nat Genet 2012)
15-56483573	15	58696281	L_HDL_P	G	C	0.03	0.53	1.53e-12	8891	European	Kettunen (Nat Genet 2012)
rs723967	15	58696300	XL_HDL_TG	C	T	0.48	-0.24	2.8e-44	8891	European	Kettunen (Nat Genet 2012)
rs28528324	15	58696971	XL_HDL_TG	C	T	0.21	0.16	1.07e-12	8891	European	Kettunen (Nat Genet 2012)
rs16940223	15	58697072	XL_HDL_TG	C	T	0.21	0.14	1.39e-12	8891	European	Kettunen (Nat Genet 2012)
rs12440032	15	58697834	XL_HDL_TG	G	C	0.22	0.18	2.88e-21	8891	European	Kettunen (Nat Genet 2012)
rs28451440	15	58698113	XL_HDL_TG	G	T	0.65	-0.15	2.77e-14	8891	European	Kettunen (Nat Genet 2012)
rs62000864	15	58698243	XL_HDL_TG	G	T	0.48	-0.26	9.16e-46	8891	European	Kettunen (Nat Genet 2012)
rs12440217	15	58698357	XL_HDL_TG	A	G	0.21	0.18	2.43e-21	8891	European	Kettunen (Nat Genet 2012)
rs11852978	15	58698755	XL_HDL_TG	G	T	0.24	0.17	7e-19	8891	European	Kettunen (Nat Genet 2012)
rs11856159	15	58699010	XL_HDL_TG	T	C	0.21	0.19	1.04e-21	8891	European	Kettunen (Nat Genet 2012)
rs13329672	15	58699937	XL_HDL_TG	T	C	0.23	0.19	4.43e-21	8891	European	Kettunen (Nat Genet 2012)
rs17240869	15	58700311	XL_HDL_TG	C	T	0.21	0.19	2.12e-21	8891	European	Kettunen (Nat Genet 2012)
rs17240876	15	58701551	XL_HDL_TG	G	A	0.21	0.19	2.27e-21	8891	European	Kettunen (Nat Genet 2012)
rs12438999	15	58702325	XL_HDL_TG	G	A	0.51	-0.28	3.03e-51	8891	European	Kettunen (Nat Genet 2012)
rs17821310	15	58702864	XL_HDL_TG	C	T	0.22	0.19	6.06e-21	8891	European	Kettunen (Nat Genet 2012)
rs17821316	15	58703069	XL_HDL_TG	C	A	0.53	-0.18	1.68e-24	8891	European	Kettunen (Nat Genet 2012)
rs17821322	15	58703100	XL_HDL_TG	C	T	0.21	0.19	1.61e-19	8891	European	Kettunen (Nat Genet 2012)
rs7183184	15	58703895	XL_HDL_TG	G	A	0.2	0.16	9.13e-12	8891	European	Kettunen (Nat Genet 2012)
rs55993842	15	58704064	XL_HDL_TG	T	G	0.21	0.19	1.73e-19	8891	European	Kettunen (Nat Genet 2012)
rs28442086	15	58705036	XL_HDL_TG	A	G	0.45	-0.23	8.99e-28	8891	European	Kettunen (Nat Genet 2012)
rs62000868	15	58705980	XL_HDL_TG	G	C	0.26	0.28	5.66e-37	8891	European	Kettunen (Nat Genet 2012)
rs62000869	15	58706911	XL_HDL_TG	G	A	0.38	0.26	2.49e-34	8891	European	Kettunen (Nat Genet 2012)
rs409668	15	58706926	XL_HDL_TG	A	T	0.47	-0.23	5.69e-41	8891	European	Kettunen (Nat Genet 2012)
rs60315394	15	58709181	XL_HDL_TG	T	C	0.16	0.23	1.93e-18	8891	European	Kettunen (Nat Genet 2012)
rs422137	15	58709182	XL_HDL_TG	A	G	0.46	0.3	2.11e-50	8891	European	Kettunen (Nat Genet 2012)
rs55696635	15	58709750	XL_HDL_TG	A	G	0.15	0.24	5.72e-19	8891	European	Kettunen (Nat Genet 2012)
rs11071380	15	58710627	XL_HDL_TG	A	C	0.44	-0.27	2.37e-36	8891	European	Kettunen (Nat Genet 2012)
rs62000870	15	58710736	XL_HDL_TG	C	T	0.3	0.26	4.39e-34	8891	European	Kettunen (Nat Genet 2012)
rs8025065	15	58711206	XL_HDL_TG	C	G	0.87	-0.23	1.49e-11	8891	European	Kettunen (Nat Genet 2012)
rs11857380	15	58712203	XL_HDL_TG	G	T	0.23	0.22	5.7e-23	8891	European	Kettunen (Nat Genet 2012)
rs11854624	15	58712817	XL_HDL_TG	G	C	0.22	0.24	2.71e-26	8891	European	Kettunen (Nat Genet 2012)
rs11854656	15	58712945	XL_HDL_TG	C	A	0.29	0.24	1.97e-25	8891	European	Kettunen (Nat Genet 2012)
rs11858279	15	58712973	XL_HDL_TG	C	T	0.31	0.31	1.01e-42	8891	European	Kettunen (Nat Genet 2012)
chr15:58716257	15	58716257	TC	A	G	0.336	0.073	8e-11	18728	European	van Leeuwen (Nat Comm 2015)
rs1373657	15	58717762	XL_HDL_TG	T	G	0.05	0.3	1.05e-12	8891	European	Kettunen (Nat Genet 2012)
rs417344	15	58717919	XL_HDL_TG	C	T	0.18	-0.15	6.54e-13	8891	European	Kettunen (Nat Genet 2012)
rs495806	15	58718697	HDL_D	A	C	0.97	-0.51	7.42e-15	8891	European	Kettunen (Nat Genet 2012)
rs7170361	15	58718998	XL_HDL_TG	C	T	0.28	0.27	2.16e-49	8891	European	Kettunen (Nat Genet 2012)
rs11635491	15	58719741	XL_HDL_TG	A	G	0.25	0.26	1.66e-44	8891	European	Kettunen (Nat Genet 2012)
rs35547826	15	58720405	XL_HDL_TG	A	G	0.18	-0.15	8.09e-12	8891	European	Kettunen (Nat Genet 2012)
rs4774297	15	58720431	XL_HDL_TG	A	C	0.55	-0.11	4.58e-12	8891	European	Kettunen (Nat Genet 2012)
rs11857386	15	58721168	XL_HDL_TG	C	G	0.5	-0.14	6.92e-16	8891	European	Kettunen (Nat Genet 2012)
rs35684611	15	58721302	XL_HDL_TG	G	A	0.18	-0.15	9.23e-12	8891	European	Kettunen (Nat Genet 2012)
rs12912415	15	58721447	XL_HDL_TG	G	A	0.17	-0.15	1.94e-12	8891	European	Kettunen (Nat Genet 2012)
rs11071381	15	58721614	XL_HDL_TG	A	G	0.57	-0.15	3.23e-18	8891	European	Kettunen (Nat Genet 2012)
rs1077835	15	58723426	XL_HDL_TG	G	A	0.26	0.33	3.16e-68	8891	European	Kettunen (Nat Genet 2012);Surakka (Nat Genet 2015);Weissglas-Volkov (J Med Gen 2013)
rs1077834	15	58723479	XL_HDL_TG	C	T	0.26	0.33	1.95e-68	8891	European	Kettunen (Nat Genet 2012)
rs1800588	15	58723675	XL_HDL_TG	T	C	0.24	0.33	4.47e-61	8891	European	Kettunen (Nat Genet 2012);Willer (Nat Genet 2013);Teslovich (Nature 2010)
rs2070895	15	58723939	HDL_C	A	G	N.R.	+	1.5e-80	187000	European	Willer (Nat Genet 2013);Teslovich (Nature 2010);Kathiresan (Nat Genet 2009);Willer (Nat Genet 2008);Kettunen (Nat Genet 2012)
rs8192701	15	58724371	XL_HDL_TG	T	C	0.17	-0.14	8.88e-12	8891	European	Kettunen (Nat Genet 2012)
rs6494005	15	58724524	XL_HDL_TG	G	A	0.49	-0.15	2.35e-20	8891	European	Kettunen (Nat Genet 2012)
rs11632618	15	58724706	XL_HDL_TG	A	G	0.06	0.28	1.32e-13	8891	European	Kettunen (Nat Genet 2012)
rs8034802	15	58724792	XL_HDL_TG	A	T	0.29	0.27	1.1e-52	8891	European	Kettunen (Nat Genet 2012)
rs8033940	15	58724842	XL_HDL_TG	A	G	0.29	0.27	1.53e-48	8891	European	Kettunen (Nat Genet 2012)
rs633695	15	58725839	XL_HDL_TG	G	A	0.29	0.27	5.69e-51	8891	European	Kettunen (Nat Genet 2012)
rs17190510	15	58726463	XL_HDL_TG	C	G	0.19	-0.16	4.32e-12	8891	European	Kettunen (Nat Genet 2012)
rs261334	15	58726744	XL_HDL_TG	C	G	0.77	-0.32	4.25e-55	8891	European	Kettunen (Nat Genet 2012);Teslovich (Nature 2010);Kathiresan (Nat Genet 2009);van Leeuwen (Nat Comm 2015)
rs261333	15	58727279	XL_HDL_TG	C	T	0.52	-0.15	1.08e-20	8891	European	Kettunen (Nat Genet 2012)
rs261332	15	58727325	XL_HDL_TG	G	A	0.82	-0.3	3.26e-47	8891	European	Kettunen (Nat Genet 2012);Willer (Nat Genet 2013);Dumitrescu (PLoS Genet 2011)
rs62000939	15	58727687	XL_HDL_TG	C	T	0.19	-0.16	5.06e-12	8891	European	Kettunen (Nat Genet 2012)
rs17190517	15	58729144	XL_HDL_TG	T	C	0.44	-0.13	1.1e-12	8891	European	Kettunen (Nat Genet 2012)
rs588136	15	58730498	XL_HDL_TG	T	C	0.76	-0.32	1.38e-65	8891	European	Kettunen (Nat Genet 2012);van Leeuwen (Nat Comm 2015)
rs12914035	15	58730889	XL_HDL_TG	G	A	0.17	-0.16	1.98e-11	8891	European	Kettunen (Nat Genet 2012)
rs261342	15	58731153	XL_HDL_TG	C	G	0.78	-0.29	4.64e-46	8891	European	Kettunen (Nat Genet 2012);Willer (Nat Genet 2013);Teslovich (Nature 2010);Teslovich (Nature 2010);Surakka (Nat Genet 2015)
rs12900622	15	58731455	XL_HDL_TG	T	C	0.82	0.16	5.26e-12	8891	European	Kettunen (Nat Genet 2012)
rs261341	15	58731567	XL_HDL_TG	G	A	0.69	-0.17	2.3e-23	8891	European	Kettunen (Nat Genet 2012)
rs261338	15	58735005	XL_HDL_TG	G	A	0.85	-0.29	1.99e-36	8891	European	Kettunen (Nat Genet 2012)
rs4775046	15	58736778	XL_HDL_TG	T	C	0.49	-0.14	2e-17	8891	European	Kettunen (Nat Genet 2012)
rs473224	15	58737341	XL_HDL_TG	G	T	0.86	-0.28	7.94e-35	8891	European	Kettunen (Nat Genet 2012)
rs488490	15	58737661	XL_HDL_TG	A	C	0.85	-0.29	1.33e-36	8891	European	Kettunen (Nat Genet 2012)
rs12914626	15	58738423	XL_HDL_TG	T	C	0.73	-0.24	3.39e-32	8891	European	Kettunen (Nat Genet 2012)
rs17269264	15	58738760	XL_HDL_TG	A	G	0.49	-0.13	6.41e-16	8891	European	Kettunen (Nat Genet 2012)
rs17269271	15	58739761	XL_HDL_TG	C	G	0.49	-0.14	7.79e-18	8891	European	Kettunen (Nat Genet 2012)
rs573922	15	58740094	XL_HDL_TG	T	C	0.78	-0.26	3.67e-42	8891	European	Kettunen (Nat Genet 2012)
rs485671	15	58741134	XL_HDL_TG	C	A	0.79	-0.28	7.14e-43	8891	European	Kettunen (Nat Genet 2012)
rs485538	15	58741177	XL_HDL_TG	T	C	0.77	-0.26	4.61e-42	8891	European	Kettunen (Nat Genet 2012)
rs572410	15	58741384	XL_HDL_TG	G	C	0.76	-0.27	9.35e-40	8891	European	Kettunen (Nat Genet 2012)
rs686958	15	58741884	XL_HDL_TG	A	T	0.78	-0.27	6.22e-43	8891	European	Kettunen (Nat Genet 2012)
rs567746	15	58741891	XL_HDL_TG	G	A	0.78	-0.27	6.43e-43	8891	European	Kettunen (Nat Genet 2012)
rs261336	15	58742418	XL_HDL_TG	A	G	0.78	-0.25	9.88e-42	8891	European	Kettunen (Nat Genet 2012)
rs11858164	15	58742731	XL_HDL_TG	G	T	0.51	-0.17	7.2e-23	8891	European	Kettunen (Nat Genet 2012)
rs8041059	15	58743709	XL_HDL_TG	T	C	0.5	-0.15	2.2e-19	8891	European	Kettunen (Nat Genet 2012)
rs10152202	15	58744348	XL_HDL_TG	G	T	0.28	-0.17	4.25e-11	8891	European	Kettunen (Nat Genet 2012)
rs10518976	15	58751201	XL_HDL_TG	A	T	0.13	0.22	1.44e-14	8891	European	Kettunen (Nat Genet 2012)
rs34101191	15	58793567	XL_HDL_TG	A	G	0.52	0.14	4.72e-12	8891	European	Kettunen (Nat Genet 2012)
15-56586253	15	58798961	XL_HDL_TG	A	G	0.02	0.78	3.16e-22	8891	European	Kettunen (Nat Genet 2012)
rs11633043	15	58837722	XL_HDL_TG	A	G	0.17	0.17	8.08e-15	8891	European	Kettunen (Nat Genet 2012)
rs7178362	15	58847263	XL_HDL_L	C	T	0.11	0.16	1.9e-10	8891	European	Kettunen (Nat Genet 2012)
rs113298164	15	58855748	HDL_C	T	C	0.75	9.6	1.4e-14	10309	European	Holmen (Nat Genet 2014)
15-56656477	15	58869185	XL_HDL_TG	G	A	0.04	0.35	2.23e-14	8891	European	Kettunen (Nat Genet 2012)
rs60439253	15	58874532	XL_HDL_P	T	C	0.04	0.33	1.83e-13	8891	European	Kettunen (Nat Genet 2012)
rs6494025	15	58876786	HDL_D	T	C	0.03	0.34	4.03e-14	8891	European	Kettunen (Nat Genet 2012)
rs16940571	15	58882792	HDL_D	T	C	0.03	0.33	1.19e-13	8891	European	Kettunen (Nat Genet 2012)
rs11638416	15	58891114	XL_HDL_P	A	T	0.04	0.32	5.43e-13	8891	European	Kettunen (Nat Genet 2012)
15-56679621	15	58892329	HDL_D	C	T	0.04	0.32	3.65e-13	8891	European	Kettunen (Nat Genet 2012)
15-56686901	15	58899609	HDL_D	C	T	0.04	0.32	7.01e-13	8891	European	Kettunen (Nat Genet 2012)
rs17269425	15	58931340	HDL_D	G	A	0.04	0.31	8.87e-13	8891	European	Kettunen (Nat Genet 2012)
15-56729966	15	58942674	HDL_D	A	G	0.04	0.31	8.94e-13	8891	European	Kettunen (Nat Genet 2012)
15-56734584	15	58947292	HDL_D	C	T	0.04	0.31	8.99e-13	8891	European	Kettunen (Nat Genet 2012)
15-56743899	15	58956607	HDL_D	G	A	0.04	0.31	9.2e-13	8891	European	Kettunen (Nat Genet 2012)
15-56759559	15	58972267	HDL_D	C	T	0.04	0.31	9.95e-13	8891	European	Kettunen (Nat Genet 2012)
15-56775016	15	58987724	HDL_D	A	G	0.04	0.31	9.96e-13	8891	European	Kettunen (Nat Genet 2012)
rs793417	15	58995437	HDL_D	C	T	0.04	0.31	9.77e-13	8891	European	Kettunen (Nat Genet 2012)
rs347118	15	59000623	HDL_D	A	G	0.04	0.31	9.67e-13	8891	European	Kettunen (Nat Genet 2012)
rs602921	15	59003934	HDL_D	T	C	0.04	0.31	9.56e-13	8891	European	Kettunen (Nat Genet 2012)
rs387005	15	59010065	HDL_D	C	T	0.04	0.31	9.34e-13	8891	European	Kettunen (Nat Genet 2012)
rs424346	15	59010962	HDL_D	T	C	0.04	0.31	6.89e-13	8891	European	Kettunen (Nat Genet 2012)
rs437549	15	59023559	HDL_D	A	T	0.03	0.35	7.19e-14	8891	European	Kettunen (Nat Genet 2012)
rs347122	15	59039232	HDL_D	C	T	0.04	0.31	8.68e-13	8891	European	Kettunen (Nat Genet 2012)
rs390390	15	59045393	HDL_D	G	A	0.04	0.31	8.35e-13	8891	European	Kettunen (Nat Genet 2012)
rs347121	15	59059056	HDL_D	G	A	0.04	0.3	4.12e-12	8891	European	Kettunen (Nat Genet 2012)
rs11639208	15	59065624	XL_HDL_TG	A	G	0.04	0.29	1.19e-11	8891	European	Kettunen (Nat Genet 2012)
15-56856482	15	59069190	XL_HDL_TG	T	C	0.04	0.3	1.14e-11	8891	European	Kettunen (Nat Genet 2012)
rs17190720	15	59069370	XL_HDL_TG	G	C	0.04	0.3	1.18e-11	8891	European	Kettunen (Nat Genet 2012)
15-56859901	15	59072609	XL_HDL_TG	C	A	0.03	0.38	2.55e-13	8891	European	Kettunen (Nat Genet 2012)
rs11631334	15	59076200	XL_HDL_TG	A	T	0.04	0.29	1.62e-11	8891	European	Kettunen (Nat Genet 2012)
rs384322	15	59080862	XL_HDL_TG	A	C	0.04	0.29	1.7e-11	8891	European	Kettunen (Nat Genet 2012)
15-56868433	15	59081141	XL_HDL_TG	T	G	0.04	0.29	1.7e-11	8891	European	Kettunen (Nat Genet 2012)
15-56885285	15	59097993	XL_HDL_TG	A	G	0.04	0.29	1.83e-11	8891	European	Kettunen (Nat Genet 2012)
15-56888709	15	59101417	XL_HDL_TG	G	A	0.04	0.29	1.82e-11	8891	European	Kettunen (Nat Genet 2012)
rs11631244	15	59106110	XL_HDL_TG	G	T	0.04	0.29	1.75e-11	8891	European	Kettunen (Nat Genet 2012)
15-56896736	15	59109444	XL_HDL_TG	G	A	0.03	0.38	2.78e-13	8891	European	Kettunen (Nat Genet 2012)
rs16940810	15	59115159	XL_HDL_TG	T	C	0.04	0.3	1.13e-11	8891	European	Kettunen (Nat Genet 2012)
15-56913280	15	59125988	XL_HDL_TG	A	G	0.03	0.38	2.08e-13	8891	European	Kettunen (Nat Genet 2012)
15-56916587	15	59129295	XL_HDL_TG	G	C	0.04	0.32	2.81e-12	8891	European	Kettunen (Nat Genet 2012)
15-56918149	15	59130857	XL_HDL_TG	T	C	0.04	0.34	1.17e-12	8891	European	Kettunen (Nat Genet 2012)
15-56918182	15	59130890	XL_HDL_TG	T	A	0.03	0.4	1.88e-13	8891	European	Kettunen (Nat Genet 2012)
15-57123671	15	59336379	XL_HDL_TG	G	A	0.07	0.24	1.76e-11	8891	European	Kettunen (Nat Genet 2012)
15-57123867	15	59336575	XL_HDL_TG	G	A	0.07	0.24	1.48e-11	8891	European	Kettunen (Nat Genet 2012)
15-57126941	15	59339649	XL_HDL_TG	C	G	0.07	0.24	1.93e-11	8891	European	Kettunen (Nat Genet 2012)
rs16940987	15	59353863	XL_HDL_TG	A	C	0.12	0.17	2.95e-11	8891	European	Kettunen (Nat Genet 2012)
15-57152983	15	59365691	XL_HDL_TG	T	A	0.11	0.18	1.48e-11	8891	European	Kettunen (Nat Genet 2012)
15-57159858	15	59372566	XL_HDL_TG	G	C	0.07	0.23	5.89e-12	8891	European	Kettunen (Nat Genet 2012)
rs1044673	15	59389466	XL_HDL_TG	A	G	0.07	0.23	6.69e-12	8891	European	Kettunen (Nat Genet 2012)
15-57219396	15	59432104	XL_HDL_TG	C	G	0.06	0.25	4.03e-11	8891	European	Kettunen (Nat Genet 2012)
15-57237189	15	59449897	XL_HDL_TG	A	G	0.17	0.14	4.96e-11	8891	European	Kettunen (Nat Genet 2012)
rs2306791	15	59453384	XL_HDL_TG	C	T	0.19	0.13	1.65e-11	8891	European	Kettunen (Nat Genet 2012)
rs12442723	15	59458663	XL_HDL_TG	C	T	0.22	0.13	3.8e-12	8891	European	Kettunen (Nat Genet 2012)
rs3816815	15	59466989	XL_HDL_TG	G	C	0.79	-0.15	1.34e-12	8891	European	Kettunen (Nat Genet 2012)
rs11632157	15	59476088	XL_HDL_TG	C	A	0.84	-0.16	5.32e-12	8891	European	Kettunen (Nat Genet 2012)
rs11637519	15	59476316	XL_HDL_TG	C	T	0.84	-0.16	5.22e-12	8891	European	Kettunen (Nat Genet 2012)
rs8036783	15	59476635	XL_HDL_TG	T	C	0.87	-0.2	9.44e-13	8891	European	Kettunen (Nat Genet 2012)
rs12593888	15	59486738	XL_HDL_TG	C	T	0.83	-0.15	2.95e-12	8891	European	Kettunen (Nat Genet 2012)
15-57277135	15	59489843	XL_HDL_TG	T	C	0.17	0.15	3.44e-12	8891	European	Kettunen (Nat Genet 2012)
15-57277452	15	59490160	XL_HDL_TG	A	G	0.17	0.15	3.54e-12	8891	European	Kettunen (Nat Genet 2012)
rs7165001	15	59505191	XL_HDL_TG	T	C	0.17	0.15	1.24e-12	8891	European	Kettunen (Nat Genet 2012)
rs2652834	15	63396867	HDL_C	A	G	0.21	-0.028	4e-11	90000	European	Willer (Nat Genet 2013);Teslovich (Nature 2010)
rs7188861	16	11454650	HDL_C	A	C	0.2	0.044	6.9e-09	60578	European	Surakka (Nat Genet 2015)
rs3198697	16	15129940	TG	T	C	0.43	-0.02	2e-08	16056	European	Waterworth (Arterioscler Thromb Vasc Biol 2010)
chr16:49498861	16	49498861	HDL_C	C	G	0.231	-0.023	6.4e-09	30589	European	van Leeuwen (Nat Comm 2015)
chr16:51493551	16	51493551	HDL_C	G	C	0.077	-0.047	6e-17	39535	European	van Leeuwen (Nat Comm 2015)
chr16:51980822	16	51980822	HDL_C	G	A	0.033	0.062	1.6e-11	36183	European	van Leeuwen (Nat Comm 2015)
chr16:52310527	16	52310527	LDL	A	G	0.193	0.049	4.4e-08	37285	European	van Leeuwen (Nat Comm 2015)
rs1121980	16	53809247	HDL_C	A	G	0.43	-0.02	7e-09	19840	European	Kathiresan (Nat Genet 2009);Willer (Nat Genet 2008)
chr16:54316920	16	54316920	HDL_C	C	G	0.193	-0.047	6.1e-27	29352	European	van Leeuwen (Nat Comm 2015)
chr16:54655478	16	54655478	HDL_C	G	C	0.026	0.125	2.7e-25	29738	European	van Leeuwen (Nat Comm 2015)
chr16:55733248	16	55733248	HDL_C	A	G	0.113	-0.054	3.4e-14	16421	European	van Leeuwen (Nat Comm 2015)
chr16:56576250	16	56576250	HDL_C	T	G	0.017	0.104	7.2e-10	27794	European	van Leeuwen (Nat Comm 2015)
chr16:56624079	16	56624079	HDL_C	G	A	0.405	-0.025	2e-13	34492	European	van Leeuwen (Nat Comm 2015)
chr16:56759695	16	56759695	HDL_C	A	G	0.042	0.115	7.6e-39	36297	European	van Leeuwen (Nat Comm 2015)
rs12596776	16	56919348	HDL_C	G	C	0.13	1.26	2.8e-08	12545	EastAsian	Kim (Nat Genet 2011)
chr16:56933409	16	56933409	HDL_C	A	G	0.039	0.141	4.8e-66	35364	European	van Leeuwen (Nat Comm 2015)
chr16:56982299	16	56982299	HDL_C	T	C	0.353	0.028	1.5e-16	38321	European	van Leeuwen (Nat Comm 2015)
rs9989419	16	56985139	HDL_C	A	G	0.39	-2.17	1.71e-53	25167	European	Dumitrescu (PLoS Genet 2011);Willer (Nat Genet 2013);Keller (J Lipid Res 2013)
chr16:56985514	16	56985514	HDL_C	A	G	0.328	0.123	2.7e-87	34728	European	van Leeuwen (Nat Comm 2015);Kettunen (Nat Genet 2012)
rs7203286	16	56986762	HDL_C	T	G	0.46	-0.17	5.71e-17	8891	European	Kettunen (Nat Genet 2012)
rs12446515	16	56987015	HDL_C	T	C	0.29	0.24	4.25e-32	8891	European	Kettunen (Nat Genet 2012)
rs56156922	16	56987369	HDL_C	C	T	0.28	0.24	1.19e-32	8891	European	Kettunen (Nat Genet 2012)
rs56228609	16	56987765	HDL_C	T	C	0.28	0.23	9.04e-33	8891	European	Kettunen (Nat Genet 2012)
rs173539	16	56988044	HDL_C	T	C	0.32	0.25	4e-75	187000	European	Willer (Nat Genet 2013);Teslovich (Nature 2010);Kettunen (Nat Genet 2012);Kraja (Diabetes 2011)
rs247616	16	56989590	HDL_C	T	C	0.29	0.23	1.08e-35	8891	European	Kettunen (Nat Genet 2012);Willer (Nat Genet 2013);Teslovich (Nature 2010);Surakka (Nat Genet 2015)
rs12923459	16	56989830	HDL_C	A	G	0.45	-0.18	7.18e-22	8891	European	Kettunen (Nat Genet 2012)
rs247617	16	56990716	HDL_C	C	A	0.72	-0.25	9.3e-60	187000	European	Willer (Nat Genet 2013);Teslovich (Nature 2010);Coram (Am J Hum Gen 2013);Wu (PLoS Genet 2013);Kettunen (Nat Genet 2012);Surakka (Nat Genet 2015)
chr16:56990803	16	56990803	HDL_C	G	A	0.246	-0.24	4.9e-205	35628	European	van Leeuwen (Nat Comm 2015)
chr16:56991363	16	56991363	HDL_C	T	C	0.329	0.197	1.7e-152	39382	European	van Leeuwen (Nat Comm 2015);Kettunen (Nat Genet 2012)
rs28888131	16	56991624	HDL_C	A	G	0.15	-0.19	3.98e-13	8891	European	Kettunen (Nat Genet 2012)
rs12920974	16	56993025	HDL_C	T	G	0.29	-0.14	2.67e-12	8891	European	Kettunen (Nat Genet 2012)
rs12149545	16	56993161	HDL_C	A	G	0.27	0.23	1.52e-35	8891	European	Kettunen (Nat Genet 2012)
rs12708967	16	56993211	HDL_C	C	T	0.16	-0.19	4.59e-14	8891	European	Kettunen (Nat Genet 2012)
rs3764261	16	56993324	HDL_C	A	C	0.32	0.241	1.00E-769		European	Teslovich (Nature 2010);Surakka (Nat Genet 2015);Dumitrescu (PLoS Genet 2011);Willer (Nat Genet 2013);Kettunen (Nat Genet 2012);van Leeuwen (Nat Comm 2015);Kathiresan (Nat Genet 2009); Waterworth (Arterioscler Thromb Vasc Biol 2010)
rs821840	16	56993886	TG	A	G	0.7	0.045	1.5e-11	59898	European	Surakka (Nat Genet 2015)
chr16:56993897	16	56993897	HDL_C	C	A	0.18	-0.217	2.2e-194	32173	European	van Leeuwen (Nat Comm 2015)
chr16:56994212	16	56994212	HDL_C	C	T	0.28	0.09	4.5e-47	37605	European	van Leeuwen (Nat Comm 2015);Kettunen (Nat Genet 2012)
rs17231506	16	56994528	HDL_C	T	C	0.31	0.243	6.9E-316	60683	European	Surakka (Nat Genet 2015);Kettunen (Nat Genet 2012)
chr16:56994894	16	56994894	HDL_C	A	G	0.533	-0.411	1e-300	35844	European	van Leeuwen (Nat Comm 2015);Kettunen (Nat Genet 2012)
rs1800775	16	56995236	TG	A	C	0.486	3.09	3.7e-93	187092	European	Willer (Nat Genet 2013);Teslovich (Nature 2010);Kettunen (Nat Genet 2012)
rs17231520	16	56995827	HDL_C	A	G	0.069	0.175	2.2e-37	6832	African-American	Wu (PLoS Genet 2013)
rs3816117	16	56996158	L_HDL_CE	C	T	0.48	0.17	5.95e-25	8891	European	Kettunen (Nat Genet 2012)
rs711752	16	56996211	L_HDL_CE	A	G	0.42	0.17	3.87e-24	8891	European	Kettunen (Nat Genet 2012)
rs708272	16	56996288	HDL_C	T	C	0.42	0.17	1.22e-23	8891	European	Kettunen (Nat Genet 2012)
rs34620476	16	56996649	L_HDL_CE	A	C	0.42	0.17	5.03e-24	8891	European	Kettunen (Nat Genet 2012)
rs1864163	16	56997233	HDL_C	G	A	0.8	4.12	7e-39	186000	European	Willer (Nat Genet 2013);Teslovich (Nature 2010);Kettunen (Nat Genet 2012)
rs183281136	16	56997349	HDL_C	C	A	0.65	-0.22	6.75e-20	3701	Mexican	Ko (Nat Comm 2014)
rs9929488	16	56998572	HDL_C	C	G	0.27	-0.17	2.81e-16	8891	European	Kettunen (Nat Genet 2012)
rs12720926	16	56998918	L_HDL_CE	G	A	0.41	0.17	1.99e-23	8891	European	Kettunen (Nat Genet 2012)
rs7203984	16	56999258	HDL_C	C	A	0.19	-0.17	7.4e-16	8891	European	Kettunen (Nat Genet 2012)
rs11508026	16	56999328	HDL_C	T	C	0.42	0.17	1.14e-22	8891	European	Kettunen (Nat Genet 2012)
rs8045855	16	57000696	L_HDL_C	A	T	0.16	-0.2	1.84e-18	8891	European	Kettunen (Nat Genet 2012)
rs12720922	16	57000885	HDL_C	A	G	0.17	-0.19	7.33e-18	8891	European	Kettunen (Nat Genet 2012)
16-55558439	16	57000938	HDL_C	A	G	0.1	-0.23	3.09e-14	8891	European	Kettunen (Nat Genet 2012);Ko (Nat Comm 2014)
rs4784741	16	57001216	HDL_C	T	C	0.42	0.16	3.09e-23	8891	European	Kettunen (Nat Genet 2012)
16-55558762	16	57001261	HDL_C	C	A	0.16	-0.2	1.1e-16	8891	European	Kettunen (Nat Genet 2012)
rs12444012	16	57001438	HDL_C	A	G	0.42	0.16	3.34e-23	8891	European	Kettunen (Nat Genet 2012)
rs9926440	16	57002663	HDL_C	G	C	0.72	0.17	2.47e-18	8891	European	Kettunen (Nat Genet 2012)
rs9939224	16	57002732	HDL_C	T	G	N.R.	-	4e-120	187111	European	Willer (Nat Genet 2013);Kettunen (Nat Genet 2012)
rs7205804	16	57004889	HDL_C	A	G	0.42	0.16	8.66e-25	8891	European	Kettunen (Nat Genet 2012);Teslovich (Nature 2010);Surakka (Nat Genet 2015)
rs1532625	16	57005301	HDL_C	T	C	0.42	0.16	1.99e-24	8891	European	Kettunen (Nat Genet 2012)
rs1532624	16	57005479	HDL_C	C	A	0.57	-0.213	9.4e-94	187099	European	Willer (Nat Genet 2013);Weissglas-Volkov (J Med Gen 2013);Kettunen (Nat Genet 2012)
rs11076175	16	57006378	HDL_C	G	A	0.16	-0.19	3.91e-18	8891	European	Kettunen (Nat Genet 2012)
rs7499892	16	57006590	HDL_C	T	C	0.16	-0.19	5.19e-18	8891	European	Kettunen (Nat Genet 2012)
rs289713	16	57006829	HDL_C	A	T	0.84	0.19	3.58e-18	8891	European	Kettunen (Nat Genet 2012)
rs5883	16	57007353	HDL_C	T	C	0.101	0.088	1.3e-13	6832	African-American	Wu (PLoS Genet 2013)
rs11076176	16	57007446	HDL_C	G	T	0.14	-0.19	1.41e-14	8891	European	Kettunen (Nat Genet 2012)
rs289714	16	57007451	HDL_C	A	G	0.84	0.16	1.43e-12	8891	European	Kettunen (Nat Genet 2012)
rs12708980	16	57012379	HDL_C	C	A	0.1	-0.04	1.8e-28	183000	European	Willer (Nat Genet 2013);Teslovich (Nature 2010)
rs5880	16	57015091	HDL_C	C	G	0.054	-5.4	9.6e-19	10309	European	Holmen (Nat Genet 2014)
rs5882	16	57016092	HDL_C	G	A	0.317	2.2	2.5e-13	10309	European	Holmen (Nat Genet 2014)
rs1566439	16	57024662	HDL_C	C	T	0.45	0.96	3.3e-08	11616	European	Kristiansson (Circ Cardiovasc Genet 2012)
chr16:57033607	16	57033607	HDL_C	A	G	0.213	-0.044	2.5e-25	32393	European	van Leeuwen (Nat Comm 2015)
chr16:57170189	16	57170189	HDL_C	C	T	0.05	0.129	1.7e-60	38481	European	van Leeuwen (Nat Comm 2015)
chr16:57470884	16	57470884	HDL_C	C	A	0.155	0.037	7.8e-18	38287	European	van Leeuwen (Nat Comm 2015)
chr16:57911524	16	57911524	HDL_C	T	C	0.015	-0.16	1.2e-13	18791	European	van Leeuwen (Nat Comm 2015)
chr16:63121015	16	63121015	HDL_C	A	G	0.09	-0.044	3.8e-16	39123	European	van Leeuwen (Nat Comm 2015)
chr16:64729743	16	64729743	HDL_C	A	G	0.161	0.031	2.6e-12	34409	European	van Leeuwen (Nat Comm 2015)
chr16:66514962	16	66514962	HDL_C	T	C	0.064	-0.046	4.1e-12	36481	European	van Leeuwen (Nat Comm 2015)
chr16:66687201	16	66687201	HDL_C	T	C	0.025	0.085	1.1e-14	25830	European	van Leeuwen (Nat Comm 2015)
chr16:67655133	16	67655133	HDL_C	C	T	0.125	0.028	1.6e-08	33452	European	van Leeuwen (Nat Comm 2015)
rs73591976	16	67811590	HDL_C	A	C	0.12	0.096	8.6e-26	60710	European	Surakka (Nat Genet 2015)
rs2271293	16	67902070	HDL_C	A	G	0.11	0.07	9e-13	95454	European	Teslovich (Nature 2010);Dumitrescu (PLoS Genet 2011)
rs8060686	16	67911517	HDL_C	T	C	0.81	-0.11	2.4e-10	39340	European	Kathiresan (Nat Genet 2009)
rs16942887	16	67928042	HDL_C	A	G	0.14	0.083	8e-54	187000	European	Willer (Nat Genet 2013);Teslovich (Nature 2010);Surakka (Nat Genet 2015)
rs8053891	16	71997789	Gp/TC	C	A	0.2	-0.13	1.49e-10	8891	European	Kettunen (Nat Genet 2012)
rs11648003	16	72052348	TC	G	A	0.22	0.07	2.8e-23	62021	European	Surakka (Nat Genet 2015)
rs12924886	16	72075593	Gp/TC	T	A	0.15	-0.16	9.99e-12	8891	European	Kettunen (Nat Genet 2012)
16-70637158	16	72079657	Gp/TC	T	C	0.14	0.17	3.21e-12	8891	European	Kettunen (Nat Genet 2012)
rs3794695	16	72097827	Gp/TC	T	C	0.19	-0.15	1.97e-13	8891	European	Kettunen (Nat Genet 2012)
rs34042070	16	72101525	Gp/TC	G	C	0.19	-0.15	1.89e-13	8891	European	Kettunen (Nat Genet 2012)
rs2000999	16	72108093	LDL_C	A	G	0.2	0.065	4e-41	186596	European	Willer (Nat Genet 2013);Surakka (Nat Genet 2015);Kettunen (Nat Genet 2012)
rs217181	16	72114002	Gp/TC	T	C	0.17	0.18	6.74e-17	8891	European	Kettunen (Nat Genet 2012)
rs2287997	16	72140553	Gp/TC	A	G	0.18	-0.16	2.65e-13	8891	European	Kettunen (Nat Genet 2012)
chr16:72148419	16	72148419	TC	G	A	0.189	0.075	9.3e-16	38036	European	van Leeuwen (Nat Comm 2015)
16-70708602	16	72151101	Gp/TC	C	T	0.22	-0.13	2e-10	8891	European	Kettunen (Nat Genet 2012)
rs4788460	16	72154509	Gp/TC	T	C	0.32	-0.12	5.72e-12	8891	European	Kettunen (Nat Genet 2012)
rs4788605	16	72154682	Gp/TC	T	G	0.23	-0.12	1.06e-10	8891	European	Kettunen (Nat Genet 2012)
rs11647069	16	72155237	Gp/TC	C	T	0.3	-0.12	7.12e-12	8891	European	Kettunen (Nat Genet 2012)
rs11641721	16	72155241	Gp/TC	A	G	0.23	-0.12	9.8e-11	8891	European	Kettunen (Nat Genet 2012)
16-70714175	16	72156674	Gp/TC	T	C	0.23	-0.12	1.03e-10	8891	European	Kettunen (Nat Genet 2012)
16-70715994	16	72158493	Gp/TC	T	C	0.23	-0.12	9.34e-11	8891	European	Kettunen (Nat Genet 2012)
16-70716283	16	72158782	Gp/TC	G	A	0.23	0.15	1.31e-10	8891	European	Kettunen (Nat Genet 2012)
16-70716284	16	72158783	Gp/TC	T	C	0.21	0.16	4.69e-12	8891	European	Kettunen (Nat Genet 2012)
rs34832584	16	72162966	Gp/TC	T	G	0.21	-0.15	7.91e-13	8891	European	Kettunen (Nat Genet 2012)
rs17603936	16	72169002	Gp/TC	A	C	0.23	-0.12	9.45e-11	8891	European	Kettunen (Nat Genet 2012)
rs4788611	16	72175256	Gp/TC	G	A	0.23	-0.12	8.1e-11	8891	European	Kettunen (Nat Genet 2012)
rs35370634	16	72184566	Gp/TC	T	C	0.23	-0.12	1.07e-10	8891	European	Kettunen (Nat Genet 2012)
rs3812985	16	72187957	Gp/TC	T	A	0.23	-0.12	1.75e-10	8891	European	Kettunen (Nat Genet 2012)
rs4788614	16	72188828	Gp/TC	C	T	0.23	-0.12	2.1e-10	8891	European	Kettunen (Nat Genet 2012)
16-70747685	16	72190184	Gp/TC	T	C	0.24	-0.12	1.76e-10	8891	European	Kettunen (Nat Genet 2012)
rs4788615	16	72192372	Gp/TC	A	G	0.23	-0.12	1.59e-10	8891	European	Kettunen (Nat Genet 2012)
16-70750114	16	72192613	Gp/TC	A	C	0.23	-0.12	1.61e-10	8891	European	Kettunen (Nat Genet 2012)
rs11648622	16	72193036	Gp/TC	A	G	0.29	-0.12	2.11e-12	8891	European	Kettunen (Nat Genet 2012)
rs8047881	16	72193906	Gp/TC	G	A	0.23	-0.12	1.83e-10	8891	European	Kettunen (Nat Genet 2012)
rs28419077	16	72196776	Gp/TC	G	A	0.23	-0.12	2.22e-10	8891	European	Kettunen (Nat Genet 2012)
rs11645898	16	72229532	Gp/TC	C	T	0.24	-0.12	1.95e-10	8891	European	Kettunen (Nat Genet 2012)
rs56823429	16	81533789	HDL_C	A	C	0.71	0.037	1.7e-08	60676	European	Surakka (Nat Genet 2015)
rs2925979	16	81534790	HDL_C	T	C	0.31	-0.035	1e-19	173000	European	Willer (Nat Genet 2013);Teslovich (Nature 2010);Surakka (Nat Genet 2015)
rs193042029	17	4667984	TG	G	T	0.01	-0.17	8.1e-09	50105	European	Surakka (Nat Genet 2015)
rs55714927	17	7080316	TC	C	T	0.78	0.057	7.4e-12	56939	European	Surakka (Nat Genet 2015)
rs314253	17	7091650	LDL_C	C	T	0.37	-0.024	3e-10	31946	European	Kathiresan (Nat Genet 2009); Aulchenko (Nat Genet 2009);Kim (Nat Genet 2011);Surakka (Nat Genet 2015)
rs881844	17	37810218	HDL_C	C	G	0.34	-0.51	2.8e-14	99892	European	Teslovich (Nature 2010)
rs11869286	17	37813856	HDL_C	G	C	0.35	-0.032	3e-17	168319	European	Willer (Nat Genet 2013)
chr17:37829571	17	37829571	HDL_C	C	A	0.416	-0.019	4.3e-09	33397	European	van Leeuwen (Nat Comm 2015)
rs77697917	17	41840849	HDL_C	C	T	0.97	0.176	1.3e-14	55329	European	Surakka (Nat Genet 2015)
chr17:41874745	17	41874745	HDL_C	A	C	0.029	-0.078	5.7e-15	25141	European	van Leeuwen (Nat Comm 2015)
rs8077889	17	41878166	TG	C	A	0.22	0.025	1e-08	18395	European	Willer (Nat Genet 2008);Surakka (Nat Genet 2015)
rs72836561	17	41926126	HDL_C	T	C	0.035	-0.14	8.5e-14	97559	European	Teslovich (Nature 2010)
rs7225700	17	45391804	LDL_C	T	C	0.35	-0.87	3.9e-09	21312	European	Kathiresan (Nat Genet 2008);Surakka (Nat Genet 2015)
rs7206971	17	45425115	TC	A	G	0.51	0.043	3.7e-13	61993	European	Surakka (Nat Genet 2015)
rs1801689	17	64210580	LDL_C	C	A	0.04	0.103	1e-11	92775	European	Teslovich (Nature 2010)
rs4148008	17	66875294	HDL_C	G	C	0.33	-0.028	1e-12	95454	European	Teslovich (Nature 2010); Waterworth (Arterioscler Thromb Vasc Biol 2010);Surakka (Nat Genet 2015)
rs77542162	17	67081278	LDL_C	G	A	0.02	0.22	1.6e-18	50230	European	Surakka (Nat Genet 2015);van Leeuwen (Nat Comm 2015)
rs4082919	17	76377482	HDL_C	G	T	0.48	-0.4	5e-09	21312	European	Kathiresan (Nat Genet 2008);Surakka (Nat Genet 2015)
rs12948394	17	76382791	HDL_C	C	T	0.55	0.034	3.9e-08	60633	European	Surakka (Nat Genet 2015)
rs4129767	17	76403984	HDL_C	G	A	0.48	-0.024	2e-11	91000	European	Willer (Nat Genet 2013);Teslovich (Nature 2010)
rs79588679	18	19907770	LDL_C	T	C	0.17	-0.049	3.6e-08	53108	European	Surakka (Nat Genet 2015)
rs9949617	18	20879217	Hypertriglyceridemia	A	G	0.47	0.78	2.43e-08	4358	Mexican	Weissglas-Volkov (J Med Gen 2013)
chr18:47096294	18	47096294	HDL_C	A	G	0.174	-0.026	2e-10	34858	European	van Leeuwen (Nat Comm 2015)
rs149615216	18	47106028	TC	T	C	0.01	0.229	1.1e-12	51002	European	Surakka (Nat Genet 2015)
rs77960347	18	47109955	HDL_C	G	A	0.014	5.8	3.6e-11	10309	European	Holmen (Nat Genet 2014)
rs10438978	18	47158186	HDL_C	C	T	0.81	0.095	7.7e-36	60727	European	Surakka (Nat Genet 2015);van Leeuwen (Nat Comm 2015)
rs7240405	18	47159090	HDL_C	A	G	0.15	-2.27	4.7e-10	29175	EastAsian	Kim (Nat Genet 2011)
rs7228085	18	47160814	XL_HDL_TG	G	A	0.46	0.11	6.7e-11	8891	European	Kettunen (Nat Genet 2012)
rs7241918	18	47160953	HDL_C	G	T	0.19	-0.09	1e-44	187000	European	Willer (Nat Genet 2013);Teslovich (Nature 2010);Surakka (Nat Genet 2015)
rs7239867	18	47164717	TC	A	G	0.17	-1.94	2e-19	173000	European	Willer (Nat Genet 2013);Teslovich (Nature 2010); Aulchenko (Nat Genet 2009);Surakka (Nat Genet 2015)
rs4939883	18	47167214	HDL_C	T	C	0.17	0.14	7e-15	100184	European	Teslovich (Nature 2010)
chr18:47169340	18	47169340	HDL_C	G	T	0.011	0.107	4e-13	30631	European	van Leeuwen (Nat Comm 2015)
rs2156552	18	47181668	HDL_C	T	A	0.84	1.2	6.4e-12	93999	European	Teslovich (Nature 2010);Dumitrescu (PLoS Genet 2011)
rs2040293	18	47278345	HDL_C	A	G	N.R.	+	4.2e-08	11205	European	Middelberg (BMC Med Genet 2011)
rs12967135	18	57849023	HDL_C	A	G	0.25	-0.026	4e-08	11546	European	Middelberg (BMC Med Genet 2011)
rs7248104	19	7224431	TG	A	G	0.42	-0.022	5e-10	27280	European	Kathiresan (Nat Genet 2009)
rs116843064	19	8429323	TG	G	A	0.97	0.183	3.9e-15	53603	European	Surakka (Nat Genet 2015);Holmen (Nat Genet 2014)
rs7255436	19	8433196	HDL_C	C	A	0.47	-0.032	2e-08	15686	European	Willer (Nat Genet 2008);Surakka (Nat Genet 2015)
rs2967605	19	8469738	HDL_C	T	C	0.16	-0.12	1e-08	18245	European	Ridker (Circ Cardiovasc Genet 2009); Saxena (Science 2008)
chr19:8627569	19	8627569	TG	T	C	0.007	-0.143	8.3e-09	5947	European	van Leeuwen (Nat Comm 2015)
19-10820660	19	10959660	IDL_FC	T	A	0.1	-0.21	2.69e-12	8891	European	Kettunen (Nat Genet 2012)
19-10884207	19	11023207	Gp/TC	G	T	0.08	0.28	1.36e-13	8891	European	Kettunen (Nat Genet 2012)
19-10983710	19	11122710	Gp/TC	T	G	0.08	0.24	1.68e-13	8891	European	Kettunen (Nat Genet 2012)
19-11018644	19	11157644	Gp/TC	A	G	0.14	0.18	1.79e-10	8891	European	Kettunen (Nat Genet 2012)
rs10423733	19	11185919	L_LDL_FC	C	T	0.16	-0.15	4.13e-11	8891	European	Kettunen (Nat Genet 2012)
19-11048611	19	11187611	M_LDL_C/M_LDL_PL	G	A	0.12	-0.2	8.82e-16	8891	European	Kettunen (Nat Genet 2012)
rs55997232	19	11188117	Gp/TC	T	C	0.07	0.26	1.27e-12	8891	European	Kettunen (Nat Genet 2012)
rs55791371	19	11188153	M_LDL_C/M_LDL_PL	C	A	0.1	-0.26	8.21e-17	8891	European	Kettunen (Nat Genet 2012)
rs56125973	19	11188164	M_LDL_C/M_LDL_PL	C	T	0.13	-0.21	8.39e-16	8891	European	Kettunen (Nat Genet 2012)
rs56289821	19	11188247	L_LDL_FC	A	G	0.12	-0.2	8.86e-16	8891	European	Kettunen (Nat Genet 2012)
19-11049850	19	11188850	L_LDL_FC	C	T	0.08	-0.25	4.58e-13	8891	European	Kettunen (Nat Genet 2012)
rs112374545	19	11188899	LDL_C	C	T	0.89	0.25	7.2e-142	58244	European	Surakka (Nat Genet 2015);Kettunen (Nat Genet 2012)
19-11050048	19	11189048	M_LDL_C/M_LDL_PL	T	A	0.1	-0.26	3.84e-16	8891	European	Kettunen (Nat Genet 2012)
rs73015011	19	11189764	LDL_C	T	C	0.82	0.194	5.7e-16	6832	African-American	Wu (PLoS Genet 2013);Kettunen (Nat Genet 2012)
19-11050937	19	11189937	L_LDL_FC	A	T	0.12	-0.2	9.01e-16	8891	European	Kettunen (Nat Genet 2012)
19-11051544	19	11190544	Gp/TC	T	C	0.06	0.31	5.63e-14	8891	European	Kettunen (Nat Genet 2012)
19-11051873	19	11190873	M_LDL_C/M_LDL_PL	T	C	0.12	-0.21	6.67e-16	8891	European	Kettunen (Nat Genet 2012);Sanna (PLoS Genet 2011)
rs61194703	19	11192193	L_LDL_FC	T	A	0.12	-0.2	9.2e-16	8891	European	Kettunen (Nat Genet 2012)
19-11053550	19	11192550	L_LDL_FC	A	G	0.12	-0.2	9.25e-16	8891	European	Kettunen (Nat Genet 2012)
19-11053831	19	11192831	L_LDL_FC	G	A	0.12	-0.2	9.29e-16	8891	European	Kettunen (Nat Genet 2012)
19-11053915	19	11192915	L_LDL_FC	G	A	0.12	-0.2	9.3e-16	8891	European	Kettunen (Nat Genet 2012)
rs11668477	19	11195030	L_LDL_FC	G	A	0.18	-0.14	6.97e-11	8891	European	Kettunen (Nat Genet 2012)
rs114197570	19	11196270	LDL_C	T	C	0.01	-0.689	3e-13	6832	African-American	Wu (PLoS Genet 2013)
rs8106503	19	11196886	L_LDL_FC	C	T	0.12	-0.2	7.57e-16	8891	European	Kettunen (Nat Genet 2012)
19-11058598	19	11197598	L_LDL_FC	T	G	0.12	-0.2	7.73e-16	8891	European	Kettunen (Nat Genet 2012)
19-11058749	19	11197749	IDL_FC	G	A	0.1	-0.24	1.27e-16	8891	European	Kettunen (Nat Genet 2012)
rs17248720	19	11198187	M_LDL_C/M_LDL_PL	T	C	0.09	-0.26	3.38e-16	8891	European	Kettunen (Nat Genet 2012)
chr19:11198502	19	11198502	LDL	C	T	0.117	-0.199	1.8e-73	38322	European	van Leeuwen (Nat Comm 2015)
rs17249141	19	11200008	LDL_C	T	C	0.013	-32.93	2e-17	7861	African-American	Coram (Am J Hum Gen 2013)
rs6511720	19	11202306	LDL_C	T	G	0.12	-0.221	4e-262	187307	European	Willer (Nat Genet 2013);Surakka (Nat Genet 2015);Dumitrescu (PLoS Genet 2011);Kettunen (Nat Genet 2012)
rs17242381	19	11206729	Gp/TC	C	T	0.12	0.19	1.37e-13	8891	European	Kettunen (Nat Genet 2012)
rs17242395	19	11206969	Gp/TC	A	G	0.13	0.19	1.06e-12	8891	European	Kettunen (Nat Genet 2012)
19-11068516	19	11207516	Gp/TC	A	G	0.06	0.29	1.89e-13	8891	European	Kettunen (Nat Genet 2012)
19-11068777	19	11207777	Gp/TC	T	C	0.14	0.17	4.05e-11	8891	European	Kettunen (Nat Genet 2012)
rs17248769	19	11209576	Gp/TC	A	G	0.11	0.19	7.86e-13	8891	European	Kettunen (Nat Genet 2012)
19-11070629	19	11209629	Gp/TC	A	G	0.11	0.19	5.26e-13	8891	European	Kettunen (Nat Genet 2012)
19-11070722	19	11209722	Gp/TC	A	C	0.11	0.19	5.6e-13	8891	European	Kettunen (Nat Genet 2012)
19-11070764	19	11209764	Gp/TC	T	C	0.11	0.19	5.77e-13	8891	European	Kettunen (Nat Genet 2012)
rs17248776	19	11210254	Gp/TC	C	G	0.11	0.19	8.06e-13	8891	European	Kettunen (Nat Genet 2012)
rs2228671	19	11210912	TC	G	A	0.88	0.158	9.3e-24	178000	European	Willer (Nat Genet 2013);Teslovich (Nature 2010);Kettunen (Nat Genet 2012);Dumitrescu (PLoS Genet 2011)
rs5930	19	11224265	LDL_C	A	G	N.R.	-	2.6e-39	186000	European	Willer (Nat Genet 2013);Teslovich (Nature 2010)
rs2738446	19	11227326	LDL_C	C	G	0.14	2.95	2e-12	95000	European	Willer (Nat Genet 2013);Teslovich (Nature 2010)
chr19:11227480	19	11227480	LDL	A	C	0.411	-0.08	3.7e-29	41483	European	van Leeuwen (Nat Comm 2015)
rs688	19	11227602	TC	T	C	N.R.	+	2.6e-27	180102	European	Willer (Nat Genet 2013);Teslovich (Nature 2010)
chr19:11233886	19	11233886	TC	T	C	0.004	0.244	7.6e-09	28049	European	van Leeuwen (Nat Comm 2015)
chr19:11248104	19	11248104	LDL	A	G	0.029	-0.158	2.8e-15	38963	European	van Leeuwen (Nat Comm 2015)
chr19:11283516	19	11283516	LDL	A	G	0.058	-0.15	4.1e-09	13262	European	van Leeuwen (Nat Comm 2015)
rs12979813	19	11342703	HDL_C	T	C	0.495	-0.024	1.99e-09	7917	African-American	Coram (Am J Hum Gen 2013)
rs737337	19	11347493	HDL_C	C	T	0.11	-0.056	5e-17	165000	European	Willer (Nat Genet 2013);Teslovich (Nature 2010)
rs2278426	19	11350488	HDL_C	T	C	0.3	-0.14	3.44e-09	4361	Mexican	Weissglas-Volkov (J Med Gen 2013)
chr19:11411868	19	11411868	LDL	A	C	0.309	-0.049	2.4e-10	39155	European	van Leeuwen (Nat Comm 2015)
chr19:18285944	19	18285944	LDL	A	G	0.27	0.06	3.2e-14	39847	European	van Leeuwen (Nat Comm 2015)
chr19:18302239	19	18302239	TC	C	T	0.286	0.058	1.8e-12	41610	European	van Leeuwen (Nat Comm 2015)
chr19:19299305	19	19299305	TC	T	C	0.061	0.134	5.2e-11	24651	European	van Leeuwen (Nat Comm 2015)
rs58542926	19	19379549	TC	C	T	0.92	0.122	8.2e-29	61981	European	Surakka (Nat Genet 2015);van Leeuwen (Nat Comm 2015);Holmen (Nat Genet 2014)
rs10401969	19	19407718	TC	C	T	0.09	-0.137	4e-77	187000	European	Willer (Nat Genet 2013);Do (Nat Genet 2013);Surakka (Nat Genet 2015)
chr19:19447352	19	19447352	LDL	G	A	0.038	-0.141	3.3e-15	31240	European	van Leeuwen (Nat Comm 2015)
rs73001065	19	19460541	LDL_C	G	C	0.93	0.114	3.1e-23	58214	European	Surakka (Nat Genet 2015)
rs16996148	19	19658472	TG	T	G	0.1	-0.1	4e-09	21312	European	Kathiresan (Nat Genet 2008);Sandhu (Lancet 2008)
rs17216525	19	19662220	TG	T	C	0.07	0.11	4e-11	89838	European	Teslovich (Nature 2010)
rs2304130	19	19789528	TC	G	A	0.07	-0.153	2e-15	130000	European	Willer (Nat Genet 2013);Kristiansson (Circ Cardiovasc Genet 2012)
rs731839	19	33899065	HDL_C	G	A	0.35	-0.022	3e-09	21412	European	Aulchenko (Nat Genet 2009);Kathiresan (Nat Genet 2008);Willer (Nat Genet 2008); Kristiansson (Circ Cardiovasc Genet 2012); Saxena (Science 2008)
chr19:35858483	19	35858483	LDL	T	C	0.396	-0.196	1.7e-95	25088	European	van Leeuwen (Nat Comm 2015)
chr19:36324324	19	36324324	LDL	G	A	0.21	-0.355	1.6e-194	25143	European	van Leeuwen (Nat Comm 2015)
chr19:36465027	19	36465027	TC	C	T	0.118	-0.302	1.6e-65	18780	European	van Leeuwen (Nat Comm 2015)
chr19:36488326	19	36488326	TC	G	A	0.053	-0.359	2.5e-57	25541	European	van Leeuwen (Nat Comm 2015)
chr19:36624359	19	36624359	LDL	A	G	0.327	-0.278	8.9e-193	28810	European	van Leeuwen (Nat Comm 2015)
chr19:37226329	19	37226329	TC	C	A	0.016	-0.825	1.7e-49	20512	European	van Leeuwen (Nat Comm 2015)
chr19:37417530	19	37417530	TC	C	G	0.062	-0.629	6.4e-188	25442	European	van Leeuwen (Nat Comm 2015)
chr19:37947185	19	37947185	LDL	T	C	0.015	1.35	1.7e-302	28961	European	van Leeuwen (Nat Comm 2015)
chr19:38269871	19	38269871	LDL	G	C	0.019	1.139	8.9e-267	26035	European	van Leeuwen (Nat Comm 2015)
chr19:38683266	19	38683266	LDL	C	A	0.027	0.92	9.2e-256	27835	European	van Leeuwen (Nat Comm 2015)
chr19:38832410	19	38832410	LDL	T	C	0.024	-0.798	1.3e-103	29871	European	van Leeuwen (Nat Comm 2015)
chr19:39120462	19	39120462	LDL	A	G	0.013	-1.969	1e-300	27829	European	van Leeuwen (Nat Comm 2015)
chr19:39292117	19	39292117	LDL	T	A	0.038	1.227	1e-300	29496	European	van Leeuwen (Nat Comm 2015)
chr19:39549365	19	39549365	LDL	G	T	0.046	-0.664	2.1e-260	25462	European	van Leeuwen (Nat Comm 2015)
chr19:40080355	19	40080355	LDL	C	G	0.015	1.137	2e-268	31633	European	van Leeuwen (Nat Comm 2015)
chr19:40102981	19	40102981	LDL	A	T	0.038	-0.526	5.5e-115	26979	European	van Leeuwen (Nat Comm 2015)
chr19:40260983	19	40260983	LDL	G	C	0.014	1.193	3.6e-166	20464	European	van Leeuwen (Nat Comm 2015)
chr19:41375256	19	41375256	LDL	G	C	0.012	-1.277	7.3e-237	17215	European	van Leeuwen (Nat Comm 2015)
chr19:41402057	19	41402057	LDL	G	A	0.01	-1.261	6.7e-63	14253	European	van Leeuwen (Nat Comm 2015)
chr19:41738212	19	41738212	LDL	T	C	0.048	-0.452	2.3e-70	19781	European	van Leeuwen (Nat Comm 2015)
chr19:42016880	19	42016880	LDL	C	T	0.316	0.22	2.8e-124	32229	European	van Leeuwen (Nat Comm 2015)
chr19:42059389	19	42059389	LDL	C	T	0.49	-0.067	9.8e-14	32725	European	van Leeuwen (Nat Comm 2015)
chr19:42107792	19	42107792	LDL	C	A	0.087	0.283	4.9e-106	38183	European	van Leeuwen (Nat Comm 2015)
chr19:42424510	19	42424510	LDL	T	C	0.07	0.554	7.8e-164	24428	European	van Leeuwen (Nat Comm 2015)
chr19:43908757	19	43908757	LDL	C	G	0.027	-0.819	1.1e-90	15396	European	van Leeuwen (Nat Comm 2015)
chr19:43912233	19	43912233	LDL	T	C	0.107	-0.298	1.7e-95	34734	European	van Leeuwen (Nat Comm 2015)
chr19:43960771	19	43960771	LDL	T	C	0.122	0.167	2.8e-33	28565	European	van Leeuwen (Nat Comm 2015)
chr19:43976583	19	43976583	LDL	T	C	0.131	-0.264	2.1e-101	35335	European	van Leeuwen (Nat Comm 2015)
chr19:44286809	19	44286809	LDL	T	C	0.025	-1.107	1e-253	32696	European	van Leeuwen (Nat Comm 2015)
chr19:44352665	19	44352665	LDL	T	C	0.332	-0.301	5.7e-212	31086	European	van Leeuwen (Nat Comm 2015)
chr19:45032407	19	45032407	LDL	G	C	0.08	-0.553	1.9e-268	32103	European	van Leeuwen (Nat Comm 2015)
rs62117160	19	45232161	M_LDL_C/M_LDL_PL	A	G	0.03	-0.57	3.44e-22	8891	European	Kettunen (Nat Genet 2012)
rs12977877	19	45245172	L_LDL_FC	A	G	0.45	0.11	1.51e-10	8891	European	Kettunen (Nat Genet 2012)
rs4803750	19	45247627	LDL_C	A	G	0.93	5.57	1.37e-09	21986	European	Dumitrescu (PLoS Genet 2011)
19-49941349	19	45249509	M_LDL_C/M_LDL_PL	T	C	0.04	-0.45	9.3e-20	8891	European	Kettunen (Nat Genet 2012)
chr19:45302504	19	45302504	LDL	A	G	0.02	-0.681	1.6e-59	16597	European	van Leeuwen (Nat Comm 2015)
rs28399653	19	45315445	LDL_C	A	G	0.034	-12.6	2.4e-08	5643	European	Holmen (Nat Genet 2014)
rs28399654	19	45316588	LDL_C	A	G	0.034	-12.6	2.4e-08	5643	European	Holmen (Nat Genet 2014)
rs10402271	19	45329214	LDL_C	G	T	0.67	2.62	1.2e-09	22562	European	Aulchenko (Nat Genet 2009);Kathiresan (Nat Genet 2008); Sabatti (Nat Genet 2009)
chr19:45337918	19	45337918	LDL	A	G	0.04	0.44	5.2e-53	20208	European	van Leeuwen (Nat Comm 2015)
chr19:45359706	19	45359706	LDL	A	G	0.27	0.235	1.7e-128	33597	European	van Leeuwen (Nat Comm 2015)
rs365653	19	45361646	M_LDL_C/M_LDL_PL	G	A	0.06	-0.33	6.54e-17	8891	European	Kettunen (Nat Genet 2012)
rs395908	19	45373565	TC	A	G	N.R.	-	2.9e-47	187000	European	Willer (Nat Genet 2013);Teslovich (Nature 2010)
rs519113	19	45376284	HDL_C	C	G	0.15	-0.018	8e-11	85000	European	Willer (Nat Genet 2013);Teslovich (Nature 2010)
chr19:45382675	19	45382675	LDL	A	G	0.038	-1.814	1e-300	31796	European	van Leeuwen (Nat Comm 2015)
19-50076245	19	45384405	S_LDL_C	C	T	0.14	-0.2	6.51e-12	8891	European	Kettunen (Nat Genet 2012)
rs12972156	19	45387459	S_LDL_L	G	C	0.19	0.14	1.93e-10	8891	European	Kettunen (Nat Genet 2012)
rs12972970	19	45387596	S_LDL_L	A	G	0.21	0.14	1.63e-10	8891	European	Kettunen (Nat Genet 2012)
rs34342646	19	45388130	S_LDL_L	A	G	0.21	0.14	1.18e-10	8891	European	Kettunen (Nat Genet 2012)
rs7254892	19	45389596	LDL_C	A	G	0.077	0.053	8E-365	188578	European	Do (Nat Genet 2013);van Leeuwen (Nat Comm 2015);Kettunen (Nat Genet 2012)
chr19:45390333	19	45390333	LDL	G	A	0.226	0.166	6.8e-29	34947	European	van Leeuwen (Nat Comm 2015)
rs157580	19	45395266	LDL_C	G	A	0.33	-0.111	2.1e-19	173000	European	Willer (Nat Genet 2013);Kettunen (Nat Genet 2012);Aulchenko (Nat Genet 2009)
rs2075650	19	45395619	TC	G	A	0.15	0.138	2.9e-19	172994	European	Willer (Nat Genet 2013)
rs34404554	19	45395909	S_LDL_L	G	C	0.17	0.14	1.55e-10	8891	European	Kettunen (Nat Genet 2012)
rs11556505	19	45396144	S_LDL_L	T	C	0.17	0.14	7.73e-11	8891	European	Kettunen (Nat Genet 2012)
rs157582	19	45396219	TG	T	C	0.22	0.1	1.4e-08	17797	European	Aulchenko (Nat Genet 2009)
rs11668327	19	45398633	M_LDL_C/M_LDL_PL	C	G	0.14	-0.24	3.81e-17	8891	European	Kettunen (Nat Genet 2012)
rs61679753	19	45400747	L_LDL_FC	A	T	0.02	-0.63	4.03e-19	8891	European	Kettunen (Nat Genet 2012)
rs1160985	19	45403412	LDL_C	C	T	0.365	6.772	1.87e-21	7861	African-American	Coram (Am J Hum Gen 2013)
chr19:45404972	19	45404972	LDL	C	T	0.504	0.097	6.3e-31	40821	European	van Leeuwen (Nat Comm 2015)
rs1038026	19	45405062	LDL_C	A	G	0.351	0.183	7.5e-21	6832	African-American	Wu (PLoS Genet 2013)
rs769446	19	45408628	L_LDL_FC	C	T	0.04	-0.48	2.8e-16	8891	European	Kettunen (Nat Genet 2012)
rs769449	19	45410002	M_LDL_C/M_LDL_PL	A	G	0.15	0.24	8.86e-25	8891	European	Kettunen (Nat Genet 2012)
rs115299243	19	45410548	LDL_C	A	G	0.98	0.391	3.4e-09	6832	African-American	Wu (PLoS Genet 2013)
rs429358	19	45411941	HDL_C	T	C	0.84	0.066	9.9e-15	55597	European	Surakka (Nat Genet 2015);Sanna (PLoS Genet 2011)
rs769455	19	45412040	TG	T	C	0.02	0.185	3.4e-10	6832	African-American	Wu (PLoS Genet 2013)
rs7412	19	45412079	LDL_C	C	T	0.93	0.413	7.5e-239	56924	European	Surakka (Nat Genet 2015);Wu (PLoS Genet 2013);Kettunen (Nat Genet 2012);Holmen (Nat Genet 2014);Sanna (PLoS Genet 2011);Aulchenko (Nat Genet 2009)
rs1065853	19	45413233	LDL_C	G	T	0.93	0.603	5E-324	50888	European	Surakka (Nat Genet 2015);Kettunen (Nat Genet 2012)
19-50106239	19	45414399	L_LDL_FC	A	C	0.07	-0.4	2.24e-32	8891	European	Kettunen (Nat Genet 2012);van Leeuwen (Nat Comm 2015)
rs439401	19	45414451	TG	T	C	0.36	-5.5	1.1e-30	184000	European	Willer (Nat Genet 2013);Teslovich (Nature 2010);Surakka (Nat Genet 2015);Tukiainen (Hum Molec Genet 2012);Kraja (Diabetes 2011)
rs445925	19	45415640	LDL_C	A	G	N.R.	-	1.6e-86	187077	European	Willer (Nat Genet 2013);Kettunen (Nat Genet 2012)
rs7256200	19	45415935	M_LDL_C/M_LDL_PL	T	G	0.13	0.3	9.87e-25	8891	European	Kettunen (Nat Genet 2012)
rs483082	19	45416178	M_LDL_C/M_LDL_PL	T	G	0.14	0.26	3.41e-15	8891	European	Kettunen (Nat Genet 2012)
rs438811	19	45416741	TG	T	C	0.24	0.096	9.2e-37	54816	European	Surakka (Nat Genet 2015)
chr19:45418486	19	45418486	LDL	A	G	0.027	0.5	1e-38	14737	European	van Leeuwen (Nat Comm 2015)
chr19:45420082	19	45420082	LDL	C	A	0.093	0.626	1.9e-192	21876	European	van Leeuwen (Nat Comm 2015)
rs12721046	19	45421254	M_LDL_C/M_LDL_PL	A	G	0.25	0.22	1.82e-15	8891	European	Kettunen (Nat Genet 2012)
chr19:45422160	19	45422160	LDL	G	C	0.2	0.441	2.8e-154	30923	European	van Leeuwen (Nat Comm 2015)
rs12721054	19	45422587	TG	G	A	0.114	-0.101	2.86e-19	7918	African-American	Coram (Am J Hum Gen 2013);Wu (PLoS Genet 2013)
rs4420638	19	45422946	LDL_C	G	A	0.19	0.225	2e-178	187211	European	Willer (Nat Genet 2013);Surakka (Nat Genet 2015);Keller (J Lipid Res 2013)
chr19:45426792	19	45426792	LDL	A	G	0.062	-1.398	1e-300	23940	European	van Leeuwen (Nat Comm 2015)
rs4803770	19	45427353	TG	C	G	N.R.	+	2.9e-12	95000	European	Willer (Nat Genet 2013);Teslovich (Nature 2010)
19-50121365	19	45429525	M_LDL_C/M_LDL_PL	A	G	0.02	-0.86	4.56e-27	8891	European	Kettunen (Nat Genet 2012)
chr19:45430280	19	45430280	TG	C	G	0.439	-0.026	1.3e-10	14479	European	van Leeuwen (Nat Comm 2015)
chr19:45436244	19	45436244	LDL	C	T	0.412	0.233	2.5e-71	14626	European	van Leeuwen (Nat Comm 2015)
chr19:45448465	19	45448465	HDL_C	G	T	0.347	0.022	2.7e-10	34268	European	van Leeuwen (Nat Comm 2015);Aulchenko (Nat Genet 2009)
chr19:45522181	19	45522181	LDL	G	A	0.527	-0.107	2.7e-31	28182	European	van Leeuwen (Nat Comm 2015)
chr19:45585167	19	45585167	LDL	T	C	0.393	-0.073	4.4e-18	34195	European	van Leeuwen (Nat Comm 2015)
chr19:45762886	19	45762886	LDL	G	A	0.254	0.584	1e-300	28386	European	van Leeuwen (Nat Comm 2015)
chr19:46320218	19	46320218	LDL	A	G	0.011	1.025	3.5e-55	23112	European	van Leeuwen (Nat Comm 2015)
chr19:46514441	19	46514441	LDL	A	G	0.269	-0.353	4.7e-237	30090	European	van Leeuwen (Nat Comm 2015)
chr19:46546840	19	46546840	LDL	A	C	0.019	-2.136	1e-300	23422	European	van Leeuwen (Nat Comm 2015)
chr19:46817166	19	46817166	LDL	T	C	0.026	1.015	9.7e-272	30111	European	van Leeuwen (Nat Comm 2015)
chr19:46824904	19	46824904	LDL	T	A	0.163	0.37	2.8e-160	25401	European	van Leeuwen (Nat Comm 2015)
chr19:46972134	19	46972134	LDL	C	G	0.026	-0.73	5.4e-129	31315	European	van Leeuwen (Nat Comm 2015)
chr19:47262197	19	47262197	LDL	T	C	0.027	-0.684	1.3e-102	23437	European	van Leeuwen (Nat Comm 2015)
chr19:47305297	19	47305297	LDL	G	C	0.394	-0.381	1.1e-305	27658	European	van Leeuwen (Nat Comm 2015)
chr19:47305760	19	47305760	LDL	G	T	0.069	1.143	1e-300	23620	European	van Leeuwen (Nat Comm 2015)
chr19:48225314	19	48225314	LDL	G	C	0.289	-0.294	7.3e-147	21226	European	van Leeuwen (Nat Comm 2015)
chr19:48533330	19	48533330	LDL	C	T	0.023	-0.921	3.7e-210	23608	European	van Leeuwen (Nat Comm 2015)
chr19:49186141	19	49186141	LDL	G	C	0.163	-0.31	1.2e-183	37415	European	van Leeuwen (Nat Comm 2015)
rs492602	19	49206417	TC	G	A	0.47	0.031	1e-16	162777	European	Willer (Nat Genet 2013);Willer (Nat Genet 2008)
chr19:49337237	19	49337237	LDL	G	A	0.095	0.624	5.2e-252	21184	European	van Leeuwen (Nat Comm 2015)
chr19:49554632	19	49554632	LDL	T	C	0.271	-0.067	9.6e-09	19697	European	van Leeuwen (Nat Comm 2015)
chr19:49728318	19	49728318	LDL	A	G	0.285	-0.243	8.1e-133	29522	European	van Leeuwen (Nat Comm 2015)
chr19:49877060	19	49877060	LDL	T	C	0.008	0.432	2.4e-10	13839	European	van Leeuwen (Nat Comm 2015)
chr19:50055223	19	50055223	TC	G	A	0.05	0.129	3.7e-08	24070	European	van Leeuwen (Nat Comm 2015)
chr19:50382870	19	50382870	LDL	G	T	0.02	1.225	2.7e-252	26299	European	van Leeuwen (Nat Comm 2015)
chr19:50747533	19	50747533	LDL	C	T	0.038	-0.747	1.2e-170	23947	European	van Leeuwen (Nat Comm 2015)
chr19:50750419	19	50750419	TC	C	T	0.177	-0.29	2.4e-159	36227	European	van Leeuwen (Nat Comm 2015)
chr19:50775408	19	50775408	LDL	T	C	0.02	-0.823	5e-80	19079	European	van Leeuwen (Nat Comm 2015)
chr19:50779151	19	50779151	LDL	T	C	0.268	0.266	2.2e-151	29675	European	van Leeuwen (Nat Comm 2015)
chr19:50929119	19	50929119	TC	G	A	0.335	0.368	1.6e-214	23622	European	van Leeuwen (Nat Comm 2015)
chr19:50929142	19	50929142	LDL	G	A	0.336	0.297	7.6e-162	22840	European	van Leeuwen (Nat Comm 2015)
chr19:51132097	19	51132097	TC	C	T	0.09	-0.595	1.4e-148	16361	European	van Leeuwen (Nat Comm 2015)
chr19:51179712	19	51179712	TC	A	G	0.486	0.063	6e-16	40428	European	van Leeuwen (Nat Comm 2015)
chr19:51301057	19	51301057	TC	C	T	0.037	-0.567	8.2e-82	23972	European	van Leeuwen (Nat Comm 2015)
chr19:51334355	19	51334355	TC	T	C	0.048	0.482	1.9e-103	26287	European	van Leeuwen (Nat Comm 2015)
chr19:51579634	19	51579634	LDL	T	C	0.024	-0.781	6.6e-103	22392	European	van Leeuwen (Nat Comm 2015)
chr19:51739226	19	51739226	TC	A	G	0.39	-0.236	9.3e-125	28387	European	van Leeuwen (Nat Comm 2015)
chr19:51801506	19	51801506	LDL	T	G	0.022	0.786	4.6e-123	24158	European	van Leeuwen (Nat Comm 2015)
chr19:51820554	19	51820554	LDL	T	G	0.02	-2.018	1e-300	21282	European	van Leeuwen (Nat Comm 2015)
chr19:51981485	19	51981485	TC	G	A	0.021	0.477	5.6e-51	26570	European	van Leeuwen (Nat Comm 2015)
chr19:52095122	19	52095122	TC	T	C	0.012	-1.112	3.3e-104	22863	European	van Leeuwen (Nat Comm 2015)
chr19:52135776	19	52135776	TC	T	G	0.296	-0.191	9.5e-28	19732	European	van Leeuwen (Nat Comm 2015)
chr19:52147969	19	52147969	TC	T	C	0.318	0.433	3.4e-137	21184	European	van Leeuwen (Nat Comm 2015)
chr19:52148617	19	52148617	LDL	G	A	0.359	-0.248	4.3e-94	20323	European	van Leeuwen (Nat Comm 2015)
chr19:52162237	19	52162237	LDL	G	A	0.326	-0.104	4.8e-29	35339	European	van Leeuwen (Nat Comm 2015)
chr19:52204328	19	52204328	TC	C	A	0.025	0.625	7.2e-88	26649	European	van Leeuwen (Nat Comm 2015)
chr19:52252712	19	52252712	LDL	A	G	0.024	1.557	1e-300	30479	European	van Leeuwen (Nat Comm 2015)
chr19:52285858	19	52285858	LDL	G	A	0.289	0.204	2.9e-104	31969	European	van Leeuwen (Nat Comm 2015)
rs17695224	19	52324216	HDL_C	A	G	0.26	-0.029	2e-13	97140	European	Teslovich (Nature 2010)
chr19:52513871	19	52513871	TC	T	A	0.006	-1.041	2.7e-39	23843	European	van Leeuwen (Nat Comm 2015)
chr19:52665260	19	52665260	TC	G	A	0.367	-0.23	3.9e-109	27839	European	van Leeuwen (Nat Comm 2015)
chr19:52846742	19	52846742	TC	G	A	0.142	0.102	3.4e-20	37747	European	van Leeuwen (Nat Comm 2015)
chr19:52925832	19	52925832	LDL	G	A	0.176	-0.279	3.3e-151	35478	European	van Leeuwen (Nat Comm 2015)
chr19:53069703	19	53069703	LDL	A	G	0.051	0.748	2.2e-263	31763	European	van Leeuwen (Nat Comm 2015)
chr19:53080928	19	53080928	LDL	A	G	0.241	-0.207	8e-117	35886	European	van Leeuwen (Nat Comm 2015)
chr19:53103677	19	53103677	LDL	T	G	0.026	0.208	4.5e-11	30709	European	van Leeuwen (Nat Comm 2015)
chr19:53112249	19	53112249	LDL	C	G	0.237	0.389	6.8e-252	28666	European	van Leeuwen (Nat Comm 2015)
chr19:53135014	19	53135014	LDL	A	G	0.249	-0.207	3.5e-52	32073	European	van Leeuwen (Nat Comm 2015)
chr19:53149057	19	53149057	LDL	A	C	0.288	0.42	4e-226	34437	European	van Leeuwen (Nat Comm 2015)
chr19:53637115	19	53637115	LDL	G	T	0.119	-0.398	1.7e-152	24761	European	van Leeuwen (Nat Comm 2015)
chr19:53783085	19	53783085	TC	T	G	0.007	1.038	1.4e-78	26813	European	van Leeuwen (Nat Comm 2015)
chr19:53836862	19	53836862	TC	A	G	0.43	0.158	6.2e-79	35947	European	van Leeuwen (Nat Comm 2015)
chr19:53981103	19	53981103	LDL	G	T	0.089	-0.56	7.9e-230	28368	European	van Leeuwen (Nat Comm 2015)
chr19:54226681	19	54226681	LDL	C	T	0.025	0.794	7.3e-97	19744	European	van Leeuwen (Nat Comm 2015)
chr19:54228064	19	54228064	LDL	A	C	0.297	-0.185	1.7e-89	31969	European	van Leeuwen (Nat Comm 2015)
chr19:54266412	19	54266412	TC	C	T	0.258	-0.21	6.5e-60	19280	European	van Leeuwen (Nat Comm 2015)
chr19:54295344	19	54295344	TC	G	T	0.45	0.284	7.4e-199	31835	European	van Leeuwen (Nat Comm 2015)
chr19:54522887	19	54522887	TC	A	G	0.226	0.089	3.3e-21	33288	European	van Leeuwen (Nat Comm 2015)
chr19:54618206	19	54618206	LDL	G	C	0.113	0.314	1.5e-129	34274	European	van Leeuwen (Nat Comm 2015)
chr19:54639661	19	54639661	LDL	G	C	0.025	-0.696	2.4e-57	21662	European	van Leeuwen (Nat Comm 2015)
chr19:54643612	19	54643612	TC	C	T	0.025	-0.567	2.8e-39	22838	European	van Leeuwen (Nat Comm 2015)
chr19:54661559	19	54661559	TC	A	G	0.334	-0.22	1.6e-131	37769	European	van Leeuwen (Nat Comm 2015)
chr19:54753823	19	54753823	TC	G	A	0.084	-0.619	5.8e-168	18464	European	van Leeuwen (Nat Comm 2015)
rs386000	19	54792761	HDL_C	C	G	0.26	0.048	3e-23	177775	European	Willer (Nat Genet 2013);Surakka (Nat Genet 2015)
chr19:54809343	19	54809343	HDL_C	G	T	0.195	0.036	9.7e-17	30756	European	van Leeuwen (Nat Comm 2015)
rs759819	19	54815577	HDL_C	C	T	0.33	0.046	6.4e-13	60469	European	Surakka (Nat Genet 2015)
chr19:54827040	19	54827040	TC	C	A	0.128	0.519	5.1e-201	19027	European	van Leeuwen (Nat Comm 2015)
chr19:55013318	19	55013318	LDL	C	T	0.208	0.286	2.1e-172	33320	European	van Leeuwen (Nat Comm 2015)
chr19:55015902	19	55015902	LDL	T	C	0.24	0.402	1.6e-252	25367	European	van Leeuwen (Nat Comm 2015)
chr19:55021466	19	55021466	TC	A	G	0.213	0.382	5.2e-216	29612	European	van Leeuwen (Nat Comm 2015)
chr19:55029298	19	55029298	TC	T	A	0.164	0.581	1.6e-285	20125	European	van Leeuwen (Nat Comm 2015)
chr19:55395951	19	55395951	TC	G	C	0.055	-0.279	6.4e-38	22592	European	van Leeuwen (Nat Comm 2015)
chr19:55454861	19	55454861	LDL	T	C	0.042	-0.801	1.1e-237	25184	European	van Leeuwen (Nat Comm 2015)
chr19:55480864	19	55480864	LDL	T	A	0.124	0.366	4.8e-139	24014	European	van Leeuwen (Nat Comm 2015)
chr19:55509644	19	55509644	TC	G	C	0.015	-0.814	8.6e-45	13953	European	van Leeuwen (Nat Comm 2015)
chr19:55513879	19	55513879	LDL	G	C	0.023	-0.941	3.7e-142	28457	European	van Leeuwen (Nat Comm 2015)
chr19:55698183	19	55698183	TC	C	T	0.094	-0.289	7e-100	37888	European	van Leeuwen (Nat Comm 2015)
chr19:56201817	19	56201817	LDL	G	A	0.098	-0.299	1e-117	36486	European	van Leeuwen (Nat Comm 2015)
chr19:56438192	19	56438192	LDL	C	T	0.005	2.023	4.8e-187	22898	European	van Leeuwen (Nat Comm 2015)
chr19:56990010	19	56990010	TC	T	C	0.202	-0.183	4.2e-79	39089	European	van Leeuwen (Nat Comm 2015)
chr19:57480893	19	57480893	LDL	A	G	0.444	-0.193	3.6e-142	38760	European	van Leeuwen (Nat Comm 2015)
chr19:58190130	19	58190130	LDL	A	G	0.036	0.742	7.2e-175	24981	European	van Leeuwen (Nat Comm 2015)
rs12983728	19	58671267	TC	A	G	0.16	-0.046	4.9e-08	58904	European	Surakka (Nat Genet 2015)
rs117492019	19	58681861	LDL_C	T	G	0.19	-0.047	1.2e-08	55371	European	Surakka (Nat Genet 2015)
rs364585	20	12962718	LDL_C	A	G	0.38	-0.025	4e-10	29262	EastAsian	Kim (Nat Genet 2011)
rs2618568	20	17843968	LDL_C	C	A	0.37	0.049	6.9e-15	58225	European	Surakka (Nat Genet 2015)
chr20:17844492	20	17844492	LDL	G	T	0.353	0.051	2.7e-09	28248	European	van Leeuwen (Nat Comm 2015)
chr20:17845072	20	17845072	TC	G	C	0.145	0.062	4.6e-08	29823	European	van Leeuwen (Nat Comm 2015)
rs2328223	20	17845921	LDL_C	C	A	0.21	0.03	6e-09	20082	European	Willer (Nat Genet 2008);Surakka (Nat Genet 2015)
rs6579245	20	34125271	TC	C	T	0.89	0.054	1e-08	62035	European	Surakka (Nat Genet 2015)
rs6120974	20	34126827	TG	T	C	0.89	0.055	2.3e-08	59910	European	Surakka (Nat Genet 2015)
rs2277862	20	34152782	TC	T	C	0.15	-0.035	5e-11	87000	European	Willer (Nat Genet 2013);Teslovich (Nature 2010);Surakka (Nat Genet 2015)
rs2902940	20	39091487	LDL_C	G	A	0.3	-0.027	2e-11	90819	European	Teslovich (Nature 2010);Kim (Nat Genet 2011);Surakka (Nat Genet 2015)
rs2902941	20	39091514	LDL_C	G	A	0.33	-0.98	1.1e-08	17815	European	Aulchenko (Nat Genet 2009);Surakka (Nat Genet 2015)
rs1883711	20	39179822	LDL_C	C	G	0.04	0.153	3.7e-16	53208	European	Surakka (Nat Genet 2015)
rs6016382	20	39181246	TC	A	T	N.R.	-	3.9e-11	90000	European	Willer (Nat Genet 2013);Kim (Nat Genet 2011)
chr20:39218023	20	39218023	LDL	G	C	0.36	-0.04	9.9e-09	39477	European	van Leeuwen (Nat Comm 2015)
rs6102059	20	39228784	LDL_C	T	C	0.32	-0.06	4e-09	21312	European	Kathiresan (Nat Genet 2008)
rs6029526	20	39672618	LDL_C	A	T	0.47	0.044	5e-18	171000	European	Willer (Nat Genet 2013);Teslovich (Nature 2010)
rs4297946	20	39811275	TC	C	G	0.47	1.52	2.8e-17	169000	European	Willer (Nat Genet 2013);Teslovich (Nature 2010)
rs909802	20	39936815	LDL_C	T	C	0.47	1.41	3.2e-19	172988	European	Willer (Nat Genet 2013)
chr20:39960342	20	39960342	TC	A	G	0.398	0.046	7.4e-10	38467	European	van Leeuwen (Nat Comm 2015)
chr20:39974316	20	39974316	LDL	G	A	0.274	0.046	2.4e-09	37734	European	van Leeuwen (Nat Comm 2015)
rs1800961	20	43042364	HDL_C	T	C	0.05	-0.127	2e-34	185188	European	Willer (Nat Genet 2013);Teslovich (Nature 2010);Surakka (Nat Genet 2015);van Leeuwen (Nat Comm 2015)
20-43736063	20	44302649	L_HDL_L/M_HDL_L	C	T	0.1	-0.21	6.11e-11	8891	European	Kettunen (Nat Genet 2012)
rs2200586	20	44351554	L_HDL_L/M_HDL_L	C	T	0.14	-0.17	9.12e-12	8891	European	Kettunen (Nat Genet 2012)
20-43824474	20	44391067	L_HDL_L/M_HDL_L	T	C	0.12	-0.16	1.53e-10	8891	European	Kettunen (Nat Genet 2012)
20-43827905	20	44394498	L_HDL_L/M_HDL_L	G	A	0.12	-0.17	1.42e-11	8891	European	Kettunen (Nat Genet 2012)
rs12480887	20	44427418	L_HDL_L/M_HDL_L	G	A	0.12	-0.16	2.07e-11	8891	European	Kettunen (Nat Genet 2012)
20-43880050	20	44446643	L_HDL_L/M_HDL_L	A	C	0.17	-0.17	9.13e-14	8891	European	Kettunen (Nat Genet 2012)
rs389877	20	44532484	L_HDL_L/M_HDL_L	C	G	0.76	-0.14	9.82e-11	8891	European	Kettunen (Nat Genet 2012)
rs6073950	20	44533110	L_HDL_L/M_HDL_L	T	A	0.49	-0.12	5.75e-11	8891	European	Kettunen (Nat Genet 2012)
rs6065904	20	44534651	L_HDL_L/M_HDL_L	A	G	0.24	-0.22	2.29e-31	8891	European	Kettunen (Nat Genet 2012);Kettunen et al (Nat Genet 2012)
rs6073952	20	44536932	L_HDL_L/M_HDL_L	A	G	0.15	-0.22	4.56e-22	8891	European	Kettunen (Nat Genet 2012)
rs6065905	20	44537837	L_HDL_L/M_HDL_L	C	T	0.15	-0.22	7.56e-22	8891	European	Kettunen (Nat Genet 2012)
rs378114	20	44538427	L_HDL_L/M_HDL_L	C	T	0.77	-0.14	1.67e-13	8891	European	Kettunen (Nat Genet 2012)
rs435306	20	44538484	L_HDL_L/M_HDL_L	T	G	0.77	-0.14	1.89e-13	8891	European	Kettunen (Nat Genet 2012)
rs58847685	20	44544947	L_HDL_L/M_HDL_L	C	T	0.15	-0.22	4.36e-24	8891	European	Kettunen (Nat Genet 2012)
rs4810479	20	44545048	L_HDL_L/M_HDL_L	T	C	0.73	0.18	9.94e-23	8891	European	Kettunen (Nat Genet 2012);Willer (Nat Genet 2013);Teslovich (Nature 2010);Kathiresan (Nat Genet 2009); Waterworth (Arterioscler Thromb Vasc Biol 2010);Surakka (Nat Genet 2015)
chr20:44545460	20	44545460	HDL_C	G	A	0.271	-0.028	1.3e-17	39734	European	van Leeuwen (Nat Comm 2015)
20-43979180	20	44545773	L_HDL_L/M_HDL_L	C	A	0.15	-0.22	4.04e-24	8891	European	Kettunen (Nat Genet 2012)
20-43979604	20	44546197	L_HDL_L/M_HDL_L	A	C	0.13	-0.23	3.35e-21	8891	European	Kettunen (Nat Genet 2012)
rs17447545	20	44547068	L_HDL_L/M_HDL_L	G	A	0.17	-0.22	8.24e-23	8891	European	Kettunen (Nat Genet 2012)
rs59329875	20	44547672	L_HDL_L/M_HDL_L	C	T	0.15	-0.22	8.89e-24	8891	European	Kettunen (Nat Genet 2012)
rs2868346	20	44547970	L_HDL_L/M_HDL_L	T	C	0.74	0.18	5.76e-23	8891	European	Kettunen (Nat Genet 2012)
rs3843763	20	44548193	L_HDL_L/M_HDL_L	T	C	0.25	0.13	2.83e-12	8891	European	Kettunen (Nat Genet 2012)
20-43981708	20	44548301	L_HDL_L/M_HDL_L	C	T	0.15	-0.22	8.73e-24	8891	European	Kettunen (Nat Genet 2012)
rs6073957	20	44549476	L_HDL_L/M_HDL_L	C	T	0.15	-0.22	8.64e-24	8891	European	Kettunen (Nat Genet 2012)
rs12185764	20	44550020	L_HDL_L/M_HDL_L	T	C	0.15	-0.22	8.57e-24	8891	European	Kettunen (Nat Genet 2012)
rs6073958	20	44551855	L_HDL_L/M_HDL_L	C	T	0.15	-0.25	5.66e-27	8891	European	Kettunen (Nat Genet 2012);Surakka (Nat Genet 2015)
rs2903809	20	44552895	L_HDL_L/M_HDL_L	A	C	0.25	0.13	1.92e-11	8891	European	Kettunen (Nat Genet 2012)
rs6065906	20	44554015	HDL_C	C	T	0.19	-0.059	5e-40	186000	European	Willer (Nat Genet 2013);Teslovich (Nature 2010);Tukiainen (Hum Molec Genet 2012);Kettunen (Nat Genet 2012);Surakka (Nat Genet 2015)
20-43990881	20	44557474	L_HDL_L/M_HDL_L	C	T	0.16	-0.23	9e-25	8891	European	Kettunen (Nat Genet 2012)
rs58952297	20	44560820	L_HDL_L/M_HDL_L	T	C	0.16	-0.23	3.4e-25	8891	European	Kettunen (Nat Genet 2012)
rs1057208	20	44563007	L_HDL_L/M_HDL_L	T	C	0.16	-0.23	1.89e-25	8891	European	Kettunen (Nat Genet 2012)
rs6065908	20	44569930	L_HDL_L/M_HDL_L	T	C	0.16	-0.21	2.61e-22	8891	European	Kettunen (Nat Genet 2012)
rs6073966	20	44570192	L_HDL_L/M_HDL_L	T	C	0.16	-0.23	1.52e-25	8891	European	Kettunen (Nat Genet 2012)
rs7679	20	44576502	L_HDL_L/M_HDL_L	C	T	0.16	-0.22	2.29e-24	8891	European	Kettunen (Nat Genet 2012);Teslovich (Nature 2010);Kathiresan (Nat Genet 2008)
rs4465830	20	44585420	L_HDL_L/M_HDL_L	G	A	0.16	-0.23	5.73e-25	8891	European	Kettunen (Nat Genet 2012)
rs6073971	20	44589970	L_HDL_L/M_HDL_L	T	C	0.16	-0.23	3.8e-25	8891	European	Kettunen (Nat Genet 2012)
20-44023552	20	44590145	L_HDL_L/M_HDL_L	T	C	0.15	-0.24	3.09e-25	8891	European	Kettunen (Nat Genet 2012)
rs6073972	20	44590298	L_HDL_L/M_HDL_L	G	C	0.16	-0.22	2.7e-24	8891	European	Kettunen (Nat Genet 2012);Surakka (Nat Genet 2015)
20-44037659	20	44604252	L_HDL_L/M_HDL_L	G	A	0.04	-0.44	3.35e-13	8891	European	Kettunen (Nat Genet 2012)
rs6104410	20	44607601	L_HDL_L/M_HDL_L	G	A	0.25	0.14	3.69e-13	8891	European	Kettunen (Nat Genet 2012)
rs6017718	20	44610737	L_HDL_L/M_HDL_L	G	T	0.25	0.13	5.77e-11	8891	European	Kettunen (Nat Genet 2012)
20-44049296	20	44615889	L_HDL_L/M_HDL_L	C	T	0.12	-0.27	3.05e-23	8891	European	Kettunen (Nat Genet 2012)
rs6017721	20	44616397	S_HDL_L	G	A	0.35	0.13	6.63e-12	8891	European	Kettunen (Nat Genet 2012)
20-44055357	20	44621950	S_HDL_L	G	A	0.08	0.31	4.45e-17	8891	European	Kettunen (Nat Genet 2012)
rs1888235	20	44623967	L_HDL_L/M_HDL_L	T	C	0.16	-0.18	8.99e-14	8891	European	Kettunen (Nat Genet 2012)
rs6073984	20	44630653	L_HDL_L/M_HDL_L	G	A	0.17	-0.15	8.6e-12	8891	European	Kettunen (Nat Genet 2012)
rs6073985	20	44630804	L_HDL_L/M_HDL_L	G	A	0.1	-0.29	4.39e-21	8891	European	Kettunen (Nat Genet 2012)
rs3918241	20	44635735	L_HDL_L/M_HDL_L	A	T	0.17	-0.15	2.04e-11	8891	European	Kettunen (Nat Genet 2012)
rs3918242	20	44635976	L_HDL_L/M_HDL_L	T	C	0.17	-0.14	1.76e-11	8891	European	Kettunen (Nat Genet 2012)
rs2274755	20	44639692	L_HDL_L/M_HDL_L	T	G	0.17	-0.14	2.4e-11	8891	European	Kettunen (Nat Genet 2012)
rs2236416	20	44640575	L_HDL_L/M_HDL_L	G	A	0.18	-0.14	2.67e-11	8891	European	Kettunen (Nat Genet 2012)
rs2274756	20	44643111	L_HDL_L/M_HDL_L	A	G	0.17	-0.14	5.36e-11	8891	European	Kettunen (Nat Genet 2012)
rs3918261	20	44643592	L_HDL_L/M_HDL_L	G	A	0.17	-0.14	4.12e-11	8891	European	Kettunen (Nat Genet 2012)
rs3918270	20	44645339	L_HDL_L/M_HDL_L	A	G	0.17	-0.14	4.1e-11	8891	European	Kettunen (Nat Genet 2012)
rs10432735	20	44650318	L_HDL_L/M_HDL_L	T	A	0.17	-0.14	4.53e-11	8891	European	Kettunen (Nat Genet 2012)
20-44095352	20	44661945	L_HDL_L/M_HDL_L	C	A	0.09	-0.3	2.22e-22	8891	European	Kettunen (Nat Genet 2012)
rs13046373	21	32060490	HDL_C	C	T	0.391	-0.023	2.26e-08	7917	African-American	Coram (Am J Hum Gen 2013)
rs181362	22	21932068	HDL_C	T	C	0.23	-0.038	4e-18	171000	European	Willer (Nat Genet 2013);Teslovich (Nature 2010);Kathiresan (Nat Genet 2009);Willer (Nat Genet 2008); Middelberg (BMC Med Genet 2011);Surakka (Nat Genet 2015)
rs5754344	22	21963786	HDL_C	A	G	0.78	0.045	2.2e-10	60544	European	Surakka (Nat Genet 2015)
rs5763662	22	30378703	LDL_C	T	C	0.04	0.077	1e-08	18243	European	Willer (Nat Genet 2008)
rs138777	22	35711098	TC	A	G	0.36	0.021	5e-08	3495	EastAsian	Tan (Hum Mol Genet 2012)
rs5756931	22	38546033	TG	C	T	0.4	-0.02	3e-08	11616	European	Kristiansson (Circ Cardiovasc Genet 2012)
rs4253772	22	46627603	TC	T	C	0.11	0.032	1e-08	17815	European	Aulchenko (Nat Genet 2009);Kristiansson (Circ Cardiovasc Genet 2012)
Variants and association data in this table were collected from 33 published GWAS, fine-mapping, and exome-sequencing studies, as of January 2016. The reported trait, Beta, and P-value are taken from the study with the lowest p-value. N.R., data not reported in the study; Chr, chromosome; Position, hg19; Trait, strongest associated trait from study shown; EA, effect allele; NEA, non-effect allele…
