# Supplementary material for: Common, low-frequency, and rare genetic variants associated with lipoprotein subclasses and triglyceride measures in Finnish men from the METSIM study
Source: PLoS Genet. 2017 Oct 30;13(10):e1007079. doi: 10.1371/journal.pgen.1007079 (PMC5679656; doi:10.1371/journal.pgen.1007079)
Supplement: S5 Table — Trait, subclass trait (defined in S1 Table); Chr, chromosome; Genotype counts for homozygous reference allele/heterozygous/homozygous alternate allele; MAC, minor allele count; MAF, minor allele frequency; P-value, p-value for the variant after conditioning on 885 known lipid-associated variants (S4 Table); Beta, effect size of the alternate allele; R2, variance explained. (XLSX) [file pgen.1007079.s012.xlsx]

## Sheet: S Table 5
S5 Table. Variants that remained significantly associated (P <5x10-8) with at least one of the 72 lipid or lipoprotein traits after conditioning on 885 known variants.
Variant	Trait	Chr	Position	Genotype count	MAC	MAF	P-value	Beta
1:34713176_A/G	LDL_D	1	34713176	231/2340/5801	13866.5	0.17185	4e-08	-0.12
1:34726845_G/T	LDL_D	1	34726845	246/2343/5783	13899.2	0.1699	2e-08	-0.12
1:94627049_T/G	S_HDL_P	1	94627049	8366/6/0	7.12	0.00043	2e-08	2.49
1:169105644_C/T	VL_VLDL_P	1	169105644	8348/24/0	24.75	0.00148	2e-08	1
1:169105644_C/T	VL_VLDL_TG	1	169105644	8348/24/0	24.75	0.00148	1e-08	1
1:169337581_G/A	VL_VLDL_P	1	169337581	8347/25/0	25.04	0.0015	8e-09	1
1:169337581_G/A	VL_VLDL_PL	1	169337581	8347/25/0	25.04	0.0015	3e-08	1
1:169337581_G/A	VL_VLDL_TG	1	169337581	8347/25/0	25.04	0.0015	6e-09	1
1:169347078_A/G	VL_VLDL_P	1	169347078	8347/25/0	25.02	0.00149	8e-09	1
1:169347078_A/G	VL_VLDL_PL	1	169347078	8347/25/0	25.02	0.00149	3e-08	1
1:169347078_A/G	VL_VLDL_TG	1	169347078	8347/25/0	25.02	0.00149	6e-09	1
1:169393471_T/C	VL_VLDL_P	1	169393471	8350/22/0	20.82	0.00124	2e-08	1
1:169393471_T/C	VL_VLDL_TG	1	169393471	8350/22/0	20.82	0.00124	1e-08	1
2:181341512_T/C	M_HDL_FC	2	181341512	8339/33/0	31.17	0.00186	4e-08	-1
2:181341512_T/C	M_HDL_P	2	181341512	8339/33/0	31.17	0.00186	1e-09	-1
2:181341512_T/C	M_HDL_PL	2	181341512	8339/33/0	31.17	0.00186	2e-09	-1
2:181379057_AATTGTTTTTAT/A	M_HDL_P	2	181379057	8339/33/0	29.56	0.00177	2e-09	-1
2:181379057_AATTGTTTTTAT/A	M_HDL_PL	2	181379057	8339/33/0	29.56	0.00177	3e-09	-1
2:181503243_T/C	M_HDL_FC	2	181503243	8344/28/0	31.28	0.00187	3e-08	-1
2:181503243_T/C	M_HDL_P	2	181503243	8344/28/0	31.28	0.00187	9e-10	-1
2:181503243_T/C	M_HDL_PL	2	181503243	8344/28/0	31.28	0.00187	1e-09	-1
3:124494121_ATGTT/A	S_APOA1	3	124494121	8084/286/2	276.81	0.01653	2e-08	-0.36
3:148625860_G/A	ESTC	3	148625860	8361/11/0	12.45	0.00074	3e-08	-2
3:148823617_G/A	ESTC	3	148823617	8360/12/0	12.82	0.00077	2e-08	-2
4:73303394_G/A	S_LDL_C	4	73303394	8098/270/4	271.65	0.01622	3e-08	0.5
4:73303394_G/A	S_LDL_P	4	73303394	8098/270/4	271.65	0.01622	1e-08	0.5
4:73462595_CA/C	S_LDL_C	4	73462595	8109/259/4	272.28	0.01626	7e-09	0.5
4:73462595_CA/C	S_LDL_P	4	73462595	8109/259/4	272.28	0.01626	4e-09	0.5
4:73474242_T/A	S_LDL_C	4	73474242	8110/258/4	273.02	0.01631	7e-09	0.5
4:73474242_T/A	S_LDL_P	4	73474242	8110/258/4	273.02	0.01631	4e-09	0.5
4:73474315_A/AT	S_LDL_C	4	73474315	8110/258/4	273.02	0.01631	7e-09	0.5
4:73474315_A/AT	S_LDL_P	4	73474315	8110/258/4	273.02	0.01631	4e-09	0.5
4:73491622_G/A	M_LDL_C	4	73491622	8112/256/4	270.68	0.01617	4e-08	0.5
4:73491622_G/A	M_LDL_CE	4	73491622	8112/256/4	270.68	0.01617	3e-08	0.5
4:73491622_G/A	M_LDL_P	4	73491622	8112/256/4	270.68	0.01617	2e-08	0.5
4:73491622_G/A	S_LDL_C	4	73491622	8112/256/4	270.68	0.01617	2e-09	0.5
4:73491622_G/A	S_LDL_P	4	73491622	8112/256/4	270.68	0.01617	1e-09	0.5
4:73520265_T/C	M_LDL_C	4	73520265	8112/256/4	270.99	0.01618	4e-08	0.5
4:73520265_T/C	M_LDL_CE	4	73520265	8112/256/4	270.99	0.01618	3e-08	0.5
4:73520265_T/C	M_LDL_P	4	73520265	8112/256/4	270.99	0.01618	2e-08	0.5
4:73520265_T/C	S_LDL_C	4	73520265	8112/256/4	270.99	0.01618	2e-09	0.5
4:73520265_T/C	S_LDL_P	4	73520265	8112/256/4	270.99	0.01618	1e-09	0.5
4:73574142_A/G	L_LDL_C	4	73574142	8107/261/4	273.31	0.01632	4e-08	0.5
4:73574142_A/G	L_LDL_CE	4	73574142	8107/261/4	273.31	0.01632	4e-08	0.5
4:73574142_A/G	L_LDL_P	4	73574142	8107/261/4	273.31	0.01632	3e-08	0.5
4:73574142_A/G	M_LDL_C	4	73574142	8107/261/4	273.31	0.01632	8e-09	0.5
4:73574142_A/G	M_LDL_CE	4	73574142	8107/261/4	273.31	0.01632	6e-09	0.5
4:73574142_A/G	M_LDL_P	4	73574142	8107/261/4	273.31	0.01632	3e-09	0.5
4:73574142_A/G	S_LDL_C	4	73574142	8107/261/4	273.31	0.01632	4e-10	0.6
4:73574142_A/G	S_LDL_P	4	73574142	8107/261/4	273.31	0.01632	2e-10	0.6
4:73668828_G/A	S_LDL_C	4	73668828	8033/335/4	352.01	0.02102	4e-08	0.4
4:73668828_G/A	S_LDL_P	4	73668828	8033/335/4	352.01	0.02102	2e-09	0.4
4:73748659_G/A	L_LDL_C	4	73748659	8104/264/4	276.81	0.01653	8e-09	0.5
4:73748659_G/A	L_LDL_CE	4	73748659	8104/264/4	276.81	0.01653	8e-09	0.5
4:73748659_G/A	L_LDL_FC	4	73748659	8104/264/4	276.81	0.01653	2e-08	0.5
4:73748659_G/A	L_LDL_P	4	73748659	8104/264/4	276.81	0.01653	5e-09	0.5
4:73748659_G/A	M_LDL_C	4	73748659	8104/264/4	276.81	0.01653	1e-09	0.5
4:73748659_G/A	M_LDL_CE	4	73748659	8104/264/4	276.81	0.01653	8e-10	0.5
4:73748659_G/A	M_LDL_P	4	73748659	8104/264/4	276.81	0.01653	4e-10	0.5
4:73748659_G/A	S_LDL_C	4	73748659	8104/264/4	276.81	0.01653	4e-11	0.6
4:73748659_G/A	S_LDL_P	4	73748659	8104/264/4	276.81	0.01653	2e-11	0.6
4:73748659_G/A	CHOL	4	73748659	8104/264/4	276.81	0.01653	1e-08	0.5
4:73748659_G/A	FREEC	4	73748659	8104/264/4	276.81	0.01653	3e-08	0.5
4:73748659_G/A	ESTC	4	73748659	8104/264/4	276.81	0.01653	7e-09	0.5
4:73768622_G/T	L_LDL_C	4	73768622	8104/264/4	276.71	0.01653	8e-09	0.5
4:73768622_G/T	L_LDL_CE	4	73768622	8104/264/4	276.71	0.01653	8e-09	0.5
4:73768622_G/T	L_LDL_FC	4	73768622	8104/264/4	276.71	0.01653	2e-08	0.5
4:73768622_G/T	L_LDL_P	4	73768622	8104/264/4	276.71	0.01653	5e-09	0.5
4:73768622_G/T	M_LDL_C	4	73768622	8104/264/4	276.71	0.01653	1e-09	0.5
4:73768622_G/T	M_LDL_CE	4	73768622	8104/264/4	276.71	0.01653	8e-10	0.5
4:73768622_G/T	M_LDL_P	4	73768622	8104/264/4	276.71	0.01653	5e-10	0.5
4:73768622_G/T	S_LDL_C	4	73768622	8104/264/4	276.71	0.01653	4e-11	0.6
4:73768622_G/T	S_LDL_P	4	73768622	8104/264/4	276.71	0.01653	2e-11	0.6
4:73768622_G/T	CHOL	4	73768622	8104/264/4	276.71	0.01653	2e-08	0.5
4:73768622_G/T	FREEC	4	73768622	8104/264/4	276.71	0.01653	3e-08	0.5
4:73768622_G/T	ESTC	4	73768622	8104/264/4	276.71	0.01653	8e-09	0.5
4:74033564_G/C	L_LDL_C	4	74033564	8100/268/4	277.66	0.01658	1e-08	0.5
4:74033564_G/C	L_LDL_CE	4	74033564	8100/268/4	277.66	0.01658	1e-08	0.5
4:74033564_G/C	L_LDL_FC	4	74033564	8100/268/4	277.66	0.01658	2e-08	0.5
4:74033564_G/C	L_LDL_P	4	74033564	8100/268/4	277.66	0.01658	5e-09	0.5
4:74033564_G/C	M_LDL_C	4	74033564	8100/268/4	277.66	0.01658	2e-09	0.5
4:74033564_G/C	M_LDL_CE	4	74033564	8100/268/4	277.66	0.01658	1e-09	0.5
4:74033564_G/C	M_LDL_P	4	74033564	8100/268/4	277.66	0.01658	6e-10	0.5
4:74033564_G/C	S_LDL_C	4	74033564	8100/268/4	277.66	0.01658	5e-11	0.6
4:74033564_G/C	S_LDL_P	4	74033564	8100/268/4	277.66	0.01658	2e-11	0.6
4:74033564_G/C	CHOL	4	74033564	8100/268/4	277.66	0.01658	1e-08	0.5
4:74033564_G/C	ESTC	4	74033564	8100/268/4	277.66	0.01658	6e-09	0.5
4:74265673_G/<DEL>	L_LDL_C	4	74265673	8108/260/4	270.22	0.01614	1e-08	0.5
4:74265673_G/<DEL>	L_LDL_CE	4	74265673	8108/260/4	270.22	0.01614	1e-08	0.51
4:74265673_G/<DEL>	L_LDL_FC	4	74265673	8108/260/4	270.22	0.01614	2e-08	0.5
4:74265673_G/<DEL>	L_LDL_P	4	74265673	8108/260/4	270.22	0.01614	6e-09	0.5
4:74265673_G/<DEL>	M_LDL_C	4	74265673	8108/260/4	270.22	0.01614	3e-09	0.5
4:74265673_G/<DEL>	M_LDL_CE	4	74265673	8108/260/4	270.22	0.01614	2e-09	0.5
4:74265673_G/<DEL>	M_LDL_P	4	74265673	8108/260/4	270.22	0.01614	7e-10	0.6
4:74265673_G/<DEL>	S_LDL_C	4	74265673	8108/260/4	270.22	0.01614	1e-10	0.6
4:74265673_G/<DEL>	S_LDL_P	4	74265673	8108/260/4	270.22	0.01614	3e-11	0.6
4:74265673_G/<DEL>	CHOL	4	74265673	8108/260/4	270.22	0.01614	3e-08	0.5
4:74265673_G/<DEL>	FREEC	4	74265673	8108/260/4	270.22	0.01614	2e-08	0.5
4:74265673_G/<DEL>	ESTC	4	74265673	8108/260/4	270.22	0.01614	6e-09	0.5
4:74388164_G/T	S_LDL_C	4	74388164	8165/206/1	195.02	0.01165	4e-08	0.6
4:74388164_G/T	S_LDL_P	4	74388164	8165/206/1	195.02	0.01165	8e-09	0.6
4:74512280_G/A	L_LDL_C	4	74512280	8115/253/4	262.1	0.01565	3e-08	0.5
4:74512280_G/A	L_LDL_CE	4	74512280	8115/253/4	262.1	0.01565	3e-08	0.5
4:74512280_G/A	L_LDL_FC	4	74512280	8115/253/4	262.1	0.01565	4e-08	0.5
4:74512280_G/A	L_LDL_P	4	74512280	8115/253/4	262.1	0.01565	1e-08	0.5
4:74512280_G/A	M_LDL_C	4	74512280	8115/253/4	262.1	0.01565	9e-09	0.5
4:74512280_G/A	M_LDL_CE	4	74512280	8115/253/4	262.1	0.01565	5e-09	0.5
4:74512280_G/A	M_LDL_P	4	74512280	8115/253/4	262.1	0.01565	3e-09	0.6
4:74512280_G/A	S_LDL_C	4	74512280	8115/253/4	262.1	0.01565	6e-10	0.6
4:74512280_G/A	S_LDL_P	4	74512280	8115/253/4	262.1	0.01565	2e-10	0.6
4:167833247_T/G	S_APOA1	4	167833247	8366/6/0	5.34	0.00032	3e-08	-2.78
9:19259791_C/A	M_HDL_C	9	19259791	8368/4/0	3.56	0.00021	5e-08	3
9:19259791_C/A	M_HDL_CE	9	19259791	8368/4/0	3.56	0.00021	4e-08	3
9:19264564_C/G	M_HDL_C	9	19264564	8368/4/0	3.58	0.00021	5e-08	3
9:19264564_C/G	M_HDL_CE	9	19264564	8368/4/0	3.58	0.00021	4e-08	3
9:19267441_A/G	M_HDL_C	9	19267441	8368/4/0	3.58	0.00021	5e-08	3
9:19267441_A/G	M_HDL_CE	9	19267441	8368/4/0	3.58	0.00021	4e-08	3
9:125168222_G/C	M_HDL_FC	9	125168222	8326/46/0	46.18	0.00276	5e-08	-0.8
9:125169165_G/C	M_HDL_FC	9	125169165	8326/46/0	46.17	0.00276	4e-08	-0.8
13:97924003_A/G	S_APOA1	13	97924003	8370/2/0	3.16	0.00019	8e-09	-4
15:70407916_C/T	VS_VLDL_TG	15	70407916	4341/3392/639	4708.59	0.28121	5e-08	0.1
16:67976823_C/T	HDL	16	67976823	8293/79/0	79	0.00472	2e-12	-0.8
16:68975770_C/T	HDL	16	68975770	8218/152/2	159.1	0.0095	4e-08	-0.5
16:69207006_C/G	HDL	16	69207006	8271/101/0	104.92	0.00627	3e-09	-0.6
16:69295084_G/A	HDL	16	69295084	8265/107/0	112.41	0.00671	8e-09	-0.6
16:69345727_C/CA	HDL	16	69345727	8297/75/0	78.47	0.00469	2e-10	-0.7
16:70587724_T/C	HDL	16	70587724	8258/114/0	112.92	0.00674	4e-08	-0.5
18:45844304_G/A	VL_HDL_TG	18	45844304	8196/176/0	175.5	0.01048	6e-09	0.4
18:46289240_G/A	L_HDL_P	18	46289240	8289/83/0	83.02	0.00496	9e-09	0.6
18:46289240_G/A	L_HDL_PL	18	46289240	8289/83/0	83.02	0.00496	1e-08	0.6
18:46289240_G/A	HDL_D	18	46289240	8289/83/0	83.02	0.00496	7e-09	0.65
18:46881108_A/G	L_HDL_P	18	46881108	8264/108/0	107.88	0.00644	6e-09	0.6
18:46881108_A/G	L_HDL_PL	18	46881108	8264/108/0	107.88	0.00644	4e-09	0.6
18:46881108_A/G	M_HDL_PL	18	46881108	8264/108/0	107.88	0.00644	3e-08	0.6
18:46881108_A/G	HDL_D	18	46881108	8264/108/0	107.88	0.00644	4e-08	0.55
18:46919860_G/T	L_HDL_P	18	46919860	8264/108/0	107.72	0.00643	6e-09	0.6
18:46919860_G/T	L_HDL_PL	18	46919860	8264/108/0	107.72	0.00643	4e-09	0.6
18:46919860_G/T	M_HDL_PL	18	46919860	8264/108/0	107.72	0.00643	3e-08	0.6
18:46919860_G/T	HDL_D	18	46919860	8264/108/0	107.72	0.00643	4e-08	0.55
18:47095862_C/T	L_HDL_C	18	47095862	8299/73/0	73	0.00436	2e-08	0.67
18:47095862_C/T	L_HDL_CE	18	47095862	8299/73/0	73	0.00436	1e-08	0.7
18:47095862_C/T	L_HDL_P	18	47095862	8299/73/0	73	0.00436	6e-10	0.7
18:47095862_C/T	L_HDL_PL	18	47095862	8299/73/0	73	0.00436	5e-10	0.8
18:47095862_C/T	M_HDL_FC	18	47095862	8299/73/0	73	0.00436	4e-08	0.7
18:47095862_C/T	M_HDL_P	18	47095862	8299/73/0	73	0.00436	2e-09	0.8
18:47095862_C/T	M_HDL_PL	18	47095862	8299/73/0	73	0.00436	1e-09	0.8
18:47095862_C/T	HDL	18	47095862	8299/73/0	73	0.00436	4e-09	0.7
18:47095862_C/T	S_APOA1	18	47095862	8299/73/0	73	0.00436	5e-10	0.77
18:47095862_C/T	HDL_D	18	47095862	8299/73/0	73	0.00436	2e-09	0.72
18:47155636_G/T	L_HDL_P	18	47155636	8306/66/0	67.19	0.00401	2e-08	0.7
18:47155636_G/T	L_HDL_PL	18	47155636	8306/66/0	67.19	0.00401	2e-08	0.7
18:47155636_G/T	M_HDL_P	18	47155636	8306/66/0	67.19	0.00401	4e-08	0.7
18:47155636_G/T	M_HDL_PL	18	47155636	8306/66/0	67.19	0.00401	2e-08	0.8
18:47155636_G/T	S_APOA1	18	47155636	8306/66/0	67.19	0.00401	4e-08	0.72
18:47155636_G/T	HDL_D	18	47155636	8306/66/0	67.19	0.00401	3e-08	0.71
18:47343410_T/A	L_HDL_C	18	47343410	8298/74/0	73.96	0.00442	2e-08	0.68
18:47343410_T/A	L_HDL_CE	18	47343410	8298/74/0	73.96	0.00442	1e-08	0.7
18:47343410_T/A	L_HDL_P	18	47343410	8298/74/0	73.96	0.00442	3e-10	0.8
18:47343410_T/A	L_HDL_PL	18	47343410	8298/74/0	73.96	0.00442	2e-10	0.8
18:47343410_T/A	M_HDL_FC	18	47343410	8298/74/0	73.96	0.00442	1e-08	0.7
18:47343410_T/A	M_HDL_P	18	47343410	8298/74/0	73.96	0.00442	7e-10	0.8
18:47343410_T/A	M_HDL_PL	18	47343410	8298/74/0	73.96	0.00442	3e-10	0.8
18:47343410_T/A	HDL	18	47343410	8298/74/0	73.96	0.00442	2e-09	0.7
18:47343410_T/A	S_APOA1	18	47343410	8298/74/0	73.96	0.00442	2e-10	0.79
18:47343410_T/A	HDL_D	18	47343410	8298/74/0	73.96	0.00442	1e-09	0.73
18:47467366_T/G	L_HDL_C	18	47467366	8301/71/0	71.22	0.00425	4e-08	0.67
18:47467366_T/G	L_HDL_CE	18	47467366	8301/71/0	71.22	0.00425	3e-08	0.7
18:47467366_T/G	L_HDL_P	18	47467366	8301/71/0	71.22	0.00425	8e-10	0.7
18:47467366_T/G	L_HDL_PL	18	47467366	8301/71/0	71.22	0.00425	6e-10	0.8
18:47467366_T/G	M_HDL_P	18	47467366	8301/71/0	71.22	0.00425	5e-09	0.7
18:47467366_T/G	M_HDL_PL	18	47467366	8301/71/0	71.22	0.00425	2e-09	0.8
18:47467366_T/G	HDL	18	47467366	8301/71/0	71.22	0.00425	6e-09	0.7
18:47467366_T/G	S_APOA1	18	47467366	8301/71/0	71.22	0.00425	2e-09	0.75
18:47467366_T/G	HDL_D	18	47467366	8301/71/0	71.22	0.00425	3e-09	0.72
18:47535778_A/G	L_HDL_P	18	47535778	8303/69/0	69.07	0.00413	4e-09	0.7
18:47535778_A/G	L_HDL_PL	18	47535778	8303/69/0	69.07	0.00413	3e-09	0.7
18:47535778_A/G	M_HDL_P	18	47535778	8303/69/0	69.07	0.00413	1e-08	0.7
18:47535778_A/G	M_HDL_PL	18	47535778	8303/69/0	69.07	0.00413	6e-09	0.8
18:47535778_A/G	HDL	18	47535778	8303/69/0	69.07	0.00413	3e-08	0.7
18:47535778_A/G	S_APOA1	18	47535778	8303/69/0	69.07	0.00413	8e-09	0.73
18:47535778_A/G	HDL_D	18	47535778	8303/69/0	69.07	0.00413	2e-08	0.69
18:47583416_A/C	L_HDL_P	18	47583416	8303/69/0	69.09	0.00413	4e-09	0.7
18:47583416_A/C	L_HDL_PL	18	47583416	8303/69/0	69.09	0.00413	3e-09	0.7
18:47583416_A/C	M_HDL_P	18	47583416	8303/69/0	69.09	0.00413	1e-08	0.7
18:47583416_A/C	M_HDL_PL	18	47583416	8303/69/0	69.09	0.00413	6e-09	0.8
18:47583416_A/C	HDL	18	47583416	8303/69/0	69.09	0.00413	3e-08	0.7
18:47583416_A/C	S_APOA1	18	47583416	8303/69/0	69.09	0.00413	8e-09	0.73
18:47583416_A/C	HDL_D	18	47583416	8303/69/0	69.09	0.00413	2e-08	0.69
18:47685886_A/T	L_HDL_P	18	47685886	8303/69/0	69.01	0.00412	4e-09	0.7
18:47685886_A/T	L_HDL_PL	18	47685886	8303/69/0	69.01	0.00412	3e-09	0.7
18:47685886_A/T	M_HDL_P	18	47685886	8303/69/0	69.01	0.00412	1e-08	0.7
18:47685886_A/T	M_HDL_PL	18	47685886	8303/69/0	69.01	0.00412	6e-09	0.8
18:47685886_A/T	HDL	18	47685886	8303/69/0	69.01	0.00412	3e-08	0.7
18:47685886_A/T	S_APOA1	18	47685886	8303/69/0	69.01	0.00412	8e-09	0.73
18:47685886_A/T	HDL_D	18	47685886	8303/69/0	69.01	0.00412	2e-08	0.69
18:47710261_T/G	L_HDL_P	18	47710261	8305/67/0	66.23	0.00396	1e-08	0.7
18:47710261_T/G	L_HDL_PL	18	47710261	8305/67/0	66.23	0.00396	1e-08	0.7
18:47710261_T/G	M_HDL_PL	18	47710261	8305/67/0	66.23	0.00396	3e-08	0.7
18:47710261_T/G	S_APOA1	18	47710261	8305/67/0	66.23	0.00396	4e-08	0.72
18:47710261_T/G	HDL_D	18	47710261	8305/67/0	66.23	0.00396	3e-08	0.7
18:47913308_T/C	L_HDL_P	18	47913308	8306/66/0	64.8	0.00387	2e-08	0.7
18:47913308_T/C	L_HDL_PL	18	47913308	8306/66/0	64.8	0.00387	2e-08	0.7
18:47913308_T/C	M_HDL_PL	18	47913308	8306/66/0	64.8	0.00387	4e-08	0.7
18:47972422_A/G	L_HDL_P	18	47972422	8309/63/0	63.05	0.00377	3e-08	0.7
18:47972422_A/G	L_HDL_PL	18	47972422	8309/63/0	63.05	0.00377	3e-08	0.7
18:47972422_A/G	M_HDL_PL	18	47972422	8309/63/0	63.05	0.00377	4e-08	0.7
18:48028415_T/C	L_HDL_P	18	48028415	8309/63/0	63.42	0.00379	3e-08	0.7
18:48028415_T/C	L_HDL_PL	18	48028415	8309/63/0	63.42	0.00379	3e-08	0.7
18:48028415_T/C	M_HDL_PL	18	48028415	8309/63/0	63.42	0.00379	4e-08	0.7
19:19252779_G/A	L_VLDL_P	19	19252779	7702/658/12	672.76	0.04018	4e-08	-0.2
19:19252779_G/A	L_VLDL_PL	19	19252779	7702/658/12	672.76	0.04018	3e-08	-0.2
19:19252779_G/A	M_VLDL_P	19	19252779	7702/658/12	672.76	0.04018	4e-08	-0.2
19:19252779_G/A	M_VLDL_PL	19	19252779	7702/658/12	672.76	0.04018	3e-08	-0.2
19:19679560_C/T	L_VLDL_P	19	19679560	7642/713/17	757.9	0.04526	4e-08	-0.2
19:19679560_C/T	L_VLDL_PL	19	19679560	7642/713/17	757.9	0.04526	2e-08	-0.2
19:19679560_C/T	M_VLDL_P	19	19679560	7642/713/17	757.9	0.04526	4e-08	-0.2
19:19679560_C/T	M_VLDL_TG	19	19679560	7642/713/17	757.9	0.04526	5e-08	-0.2
19:46785698_A/G	M_VLDL_PL	19	46785698	7125/1195/52	1298.36	0.07754	3e-07	-0.2
19:46785698_A/G	M_VLDL_TG	19	46785698	7125/1195/52	1298.36	0.07754	4e-08	-0.2
19:46785698_A/G	S_VLDL_TG	19	46785698	7125/1195/52	1298.36	0.07754	2e-08	-0.2
19:46785698_A/G	TG	19	46785698	7125/1195/52	1298.36	0.07754	5e-08	-0.2
19:46791934_C/T	L_VLDL_P	19	46791934	6920/1386/66	1519.05	0.09072	3e-08	-0.2
19:46791934_C/T	L_VLDL_PL	19	46791934	6920/1386/66	1519.05	0.09072	5e-08	-0.2
19:46791934_C/T	L_VLDL_TG	19	46791934	6920/1386/66	1519.05	0.09072	1e-08	-0.2
19:46791934_C/T	M_VLDL_C	19	46791934	6920/1386/66	1519.05	0.09072	4e-08	-0.2
19:46791934_C/T	M_VLDL_FC	19	46791934	6920/1386/66	1519.05	0.09072	2e-08	-0.2
19:46791934_C/T	M_VLDL_P	19	46791934	6920/1386/66	1519.05	0.09072	6e-09	-0.2
19:46791934_C/T	M_VLDL_PL	19	46791934	6920/1386/66	1519.05	0.09072	1e-08	-0.2
19:46791934_C/T	M_VLDL_TG	19	46791934	6920/1386/66	1519.05	0.09072	4e-09	-0.2
19:46791934_C/T	S_VLDL_P	19	46791934	6920/1386/66	1519.05	0.09072	5e-09	-0.2
19:46791934_C/T	S_VLDL_PL	19	46791934	6920/1386/66	1519.05	0.09072	2e-08	-0.2
19:46791934_C/T	S_VLDL_TG	19	46791934	6920/1386/66	1519.05	0.09072	3e-09	-0.2
19:46791934_C/T	TG	19	46791934	6920/1386/66	1519.05	0.09072	1e-08	-0.2
19:46794534_C/CT	L_VLDL_P	19	46794534	6919/1387/66	1520.35	0.0908	3e-08	-0.2
19:46794534_C/CT	L_VLDL_TG	19	46794534	6919/1387/66	1520.35	0.0908	1e-08	-0.2
19:46794534_C/CT	M_VLDL_C	19	46794534	6919/1387/66	1520.35	0.0908	4e-08	-0.2
19:46794534_C/CT	M_VLDL_FC	19	46794534	6919/1387/66	1520.35	0.0908	2e-08	-0.2
19:46794534_C/CT	M_VLDL_P	19	46794534	6919/1387/66	1520.35	0.0908	6e-09	-0.2
19:46794534_C/CT	M_VLDL_PL	19	46794534	6919/1387/66	1520.35	0.0908	1e-08	-0.2
19:46794534_C/CT	M_VLDL_TG	19	46794534	6919/1387/66	1520.35	0.0908	4e-09	-0.2
19:46794534_C/CT	S_VLDL_P	19	46794534	6919/1387/66	1520.35	0.0908	5e-09	-0.2
19:46794534_C/CT	S_VLDL_PL	19	46794534	6919/1387/66	1520.35	0.0908	2e-08	-0.2
19:46794534_C/CT	S_VLDL_TG	19	46794534	6919/1387/66	1520.35	0.0908	3e-09	-0.2
19:46794534_C/CT	TG	19	46794534	6919/1387/66	1520.35	0.0908	1e-08	-0.2
19:46795067_T/C	L_VLDL_P	19	46795067	6934/1373/65	1502.29	0.08972	4e-08	-0.2
19:46795067_T/C	L_VLDL_TG	19	46795067	6934/1373/65	1502.29	0.08972	2e-08	-0.2
19:46795067_T/C	M_VLDL_FC	19	46795067	6934/1373/65	1502.29	0.08972	3e-08	-0.2
19:46795067_T/C	M_VLDL_P	19	46795067	6934/1373/65	1502.29	0.08972	9e-09	-0.2
19:46795067_T/C	M_VLDL_PL	19	46795067	6934/1373/65	1502.29	0.08972	2e-08	-0.2
19:46795067_T/C	M_VLDL_TG	19	46795067	6934/1373/65	1502.29	0.08972	6e-09	-0.2
19:46795067_T/C	S_VLDL_P	19	46795067	6934/1373/65	1502.29	0.08972	1e-08	-0.2
19:46795067_T/C	S_VLDL_TG	19	46795067	6934/1373/65	1502.29	0.08972	5e-09	-0.2
19:46795067_T/C	TG	19	46795067	6934/1373/65	1502.29	0.08972	1e-08	-0.2
19:46795109_C/A	L_VLDL_P	19	46795109	6920/1386/66	1518.46	0.09069	3e-08	-0.2
19:46795109_C/A	L_VLDL_PL	19	46795109	6920/1386/66	1518.46	0.09069	5e-08	-0.2
19:46795109_C/A	L_VLDL_TG	19	46795109	6920/1386/66	1518.46	0.09069	1e-08	-0.2
19:46795109_C/A	M_VLDL_C	19	46795109	6920/1386/66	1518.46	0.09069	4e-08	-0.2
19:46795109_C/A	M_VLDL_FC	19	46795109	6920/1386/66	1518.46	0.09069	2e-08	-0.2
19:46795109_C/A	M_VLDL_P	19	46795109	6920/1386/66	1518.46	0.09069	6e-09	-0.2
19:46795109_C/A	M_VLDL_PL	19	46795109	6920/1386/66	1518.46	0.09069	1e-08	-0.2
19:46795109_C/A	M_VLDL_TG	19	46795109	6920/1386/66	1518.46	0.09069	4e-09	-0.2
19:46795109_C/A	S_VLDL_P	19	46795109	6920/1386/66	1518.46	0.09069	5e-09	-0.2
19:46795109_C/A	S_VLDL_PL	19	46795109	6920/1386/66	1518.46	0.09069	2e-08	-0.2
19:46795109_C/A	S_VLDL_TG	19	46795109	6920/1386/66	1518.46	0.09069	3e-09	-0.2
19:46795109_C/A	TG	19	46795109	6920/1386/66	1518.46	0.09069	1e-08	-0.2
19:46795171_T/C	L_VLDL_P	19	46795171	6920/1386/66	1518.44	0.09069	3e-08	-0.2
19:46795171_T/C	L_VLDL_PL	19	46795171	6920/1386/66	1518.44	0.09069	5e-08	-0.2
19:46795171_T/C	L_VLDL_TG	19	46795171	6920/1386/66	1518.44	0.09069	1e-08	-0.2
19:46795171_T/C	M_VLDL_C	19	46795171	6920/1386/66	1518.44	0.09069	4e-08	-0.2
19:46795171_T/C	M_VLDL_FC	19	46795171	6920/1386/66	1518.44	0.09069	2e-08	-0.2
19:46795171_T/C	M_VLDL_P	19	46795171	6920/1386/66	1518.44	0.09069	6e-09	-0.2
19:46795171_T/C	M_VLDL_PL	19	46795171	6920/1386/66	1518.44	0.09069	1e-08	-0.2
19:46795171_T/C	M_VLDL_TG	19	46795171	6920/1386/66	1518.44	0.09069	4e-09	-0.2
19:46795171_T/C	S_VLDL_P	19	46795171	6920/1386/66	1518.44	0.09069	5e-09	-0.2
19:46795171_T/C	S_VLDL_PL	19	46795171	6920/1386/66	1518.44	0.09069	2e-08	-0.2
19:46795171_T/C	S_VLDL_TG	19	46795171	6920/1386/66	1518.44	0.09069	3e-09	-0.2
19:46795171_T/C	TG	19	46795171	6920/1386/66	1518.44	0.09069	1e-08	-0.2
19:46795246_C/A	L_VLDL_P	19	46795246	6920/1386/66	1518.43	0.09069	3e-08	-0.2
19:46795246_C/A	L_VLDL_PL	19	46795246	6920/1386/66	1518.43	0.09069	5e-08	-0.2
19:46795246_C/A	L_VLDL_TG	19	46795246	6920/1386/66	1518.43	0.09069	1e-08	-0.2
19:46795246_C/A	M_VLDL_C	19	46795246	6920/1386/66	1518.43	0.09069	4e-08	-0.2
19:46795246_C/A	M_VLDL_FC	19	46795246	6920/1386/66	1518.43	0.09069	2e-08	-0.2
19:46795246_C/A	M_VLDL_P	19	46795246	6920/1386/66	1518.43	0.09069	6e-09	-0.2
19:46795246_C/A	M_VLDL_PL	19	46795246	6920/1386/66	1518.43	0.09069	1e-08	-0.2
19:46795246_C/A	M_VLDL_TG	19	46795246	6920/1386/66	1518.43	0.09069	4e-09	-0.2
19:46795246_C/A	S_VLDL_P	19	46795246	6920/1386/66	1518.43	0.09069	5e-09	-0.2
19:46795246_C/A	S_VLDL_PL	19	46795246	6920/1386/66	1518.43	0.09069	2e-08	-0.2
19:46795246_C/A	S_VLDL_TG	19	46795246	6920/1386/66	1518.43	0.09069	3e-09	-0.2
19:46795246_C/A	TG	19	46795246	6920/1386/66	1518.43	0.09069	1e-08	-0.2
19:46795884_C/T	L_VLDL_P	19	46795884	6920/1386/66	1518.41	0.09068	3e-08	-0.2
19:46795884_C/T	L_VLDL_PL	19	46795884	6920/1386/66	1518.41	0.09068	5e-08	-0.2
19:46795884_C/T	L_VLDL_TG	19	46795884	6920/1386/66	1518.41	0.09068	1e-08	-0.2
19:46795884_C/T	M_VLDL_C	19	46795884	6920/1386/66	1518.41	0.09068	4e-08	-0.2
19:46795884_C/T	M_VLDL_FC	19	46795884	6920/1386/66	1518.41	0.09068	2e-08	-0.2
19:46795884_C/T	M_VLDL_P	19	46795884	6920/1386/66	1518.41	0.09068	6e-09	-0.2
19:46795884_C/T	M_VLDL_PL	19	46795884	6920/1386/66	1518.41	0.09068	1e-08	-0.2
19:46795884_C/T	M_VLDL_TG	19	46795884	6920/1386/66	1518.41	0.09068	4e-09	-0.2
19:46795884_C/T	S_VLDL_P	19	46795884	6920/1386/66	1518.41	0.09068	5e-09	-0.2
19:46795884_C/T	S_VLDL_PL	19	46795884	6920/1386/66	1518.41	0.09068	2e-08	-0.2
19:46795884_C/T	S_VLDL_TG	19	46795884	6920/1386/66	1518.41	0.09068	3e-09	-0.2
19:46795884_C/T	TG	19	46795884	6920/1386/66	1518.41	0.09068	1e-08	-0.2
19:46796033_T/C	L_VLDL_P	19	46796033	6920/1386/66	1518.38	0.09068	3e-08	-0.2
19:46796033_T/C	L_VLDL_PL	19	46796033	6920/1386/66	1518.38	0.09068	5e-08	-0.2
19:46796033_T/C	L_VLDL_TG	19	46796033	6920/1386/66	1518.38	0.09068	1e-08	-0.2
19:46796033_T/C	M_VLDL_C	19	46796033	6920/1386/66	1518.38	0.09068	4e-08	-0.2
19:46796033_T/C	M_VLDL_FC	19	46796033	6920/1386/66	1518.38	0.09068	2e-08	-0.2
19:46796033_T/C	M_VLDL_P	19	46796033	6920/1386/66	1518.38	0.09068	6e-09	-0.2
19:46796033_T/C	M_VLDL_PL	19	46796033	6920/1386/66	1518.38	0.09068	1e-08	-0.2
19:46796033_T/C	M_VLDL_TG	19	46796033	6920/1386/66	1518.38	0.09068	4e-09	-0.2
19:46796033_T/C	S_VLDL_P	19	46796033	6920/1386/66	1518.38	0.09068	5e-09	-0.2
19:46796033_T/C	S_VLDL_PL	19	46796033	6920/1386/66	1518.38	0.09068	2e-08	-0.2
19:46796033_T/C	S_VLDL_TG	19	46796033	6920/1386/66	1518.38	0.09068	3e-09	-0.2
19:46796033_T/C	TG	19	46796033	6920/1386/66	1518.38	0.09068	1e-08	-0.2
19:46796178_G/A	L_VLDL_P	19	46796178	6920/1386/66	1518.37	0.09068	3e-08	-0.2
19:46796178_G/A	L_VLDL_PL	19	46796178	6920/1386/66	1518.37	0.09068	5e-08	-0.2
19:46796178_G/A	L_VLDL_TG	19	46796178	6920/1386/66	1518.37	0.09068	1e-08	-0.2
19:46796178_G/A	M_VLDL_C	19	46796178	6920/1386/66	1518.37	0.09068	4e-08	-0.2
19:46796178_G/A	M_VLDL_FC	19	46796178	6920/1386/66	1518.37	0.09068	2e-08	-0.2
19:46796178_G/A	M_VLDL_P	19	46796178	6920/1386/66	1518.37	0.09068	6e-09	-0.2
19:46796178_G/A	M_VLDL_PL	19	46796178	6920/1386/66	1518.37	0.09068	1e-08	-0.2
19:46796178_G/A	M_VLDL_TG	19	46796178	6920/1386/66	1518.37	0.09068	4e-09	-0.2
19:46796178_G/A	S_VLDL_P	19	46796178	6920/1386/66	1518.37	0.09068	5e-09	-0.2
19:46796178_G/A	S_VLDL_PL	19	46796178	6920/1386/66	1518.37	0.09068	2e-08	-0.2
19:46796178_G/A	S_VLDL_TG	19	46796178	6920/1386/66	1518.37	0.09068	3e-09	-0.2
19:46796178_G/A	TG	19	46796178	6920/1386/66	1518.37	0.09068	1e-08	-0.2
19:46796418_G/A	L_VLDL_P	19	46796418	6920/1386/66	1518.35	0.09068	3e-08	-0.2
19:46796418_G/A	L_VLDL_PL	19	46796418	6920/1386/66	1518.35	0.09068	5e-08	-0.2
19:46796418_G/A	L_VLDL_TG	19	46796418	6920/1386/66	1518.35	0.09068	1e-08	-0.2
19:46796418_G/A	M_VLDL_C	19	46796418	6920/1386/66	1518.35	0.09068	4e-08	-0.2
19:46796418_G/A	M_VLDL_FC	19	46796418	6920/1386/66	1518.35	0.09068	2e-08	-0.2
19:46796418_G/A	M_VLDL_P	19	46796418	6920/1386/66	1518.35	0.09068	6e-09	-0.2
19:46796418_G/A	M_VLDL_PL	19	46796418	6920/1386/66	1518.35	0.09068	1e-08	-0.2
19:46796418_G/A	M_VLDL_TG	19	46796418	6920/1386/66	1518.35	0.09068	4e-09	-0.2
19:46796418_G/A	S_VLDL_P	19	46796418	6920/1386/66	1518.35	0.09068	5e-09	-0.2
19:46796418_G/A	S_VLDL_PL	19	46796418	6920/1386/66	1518.35	0.09068	2e-08	-0.2
19:46796418_G/A	S_VLDL_TG	19	46796418	6920/1386/66	1518.35	0.09068	3e-09	-0.2
19:46796418_G/A	TG	19	46796418	6920/1386/66	1518.35	0.09068	1e-08	-0.2
19:46796502_A/C	L_VLDL_P	19	46796502	6920/1386/66	1518.26	0.09068	3e-08	-0.2
19:46796502_A/C	L_VLDL_PL	19	46796502	6920/1386/66	1518.26	0.09068	5e-08	-0.2
19:46796502_A/C	L_VLDL_TG	19	46796502	6920/1386/66	1518.26	0.09068	1e-08	-0.2
19:46796502_A/C	M_VLDL_C	19	46796502	6920/1386/66	1518.26	0.09068	4e-08	-0.2
19:46796502_A/C	M_VLDL_FC	19	46796502	6920/1386/66	1518.26	0.09068	2e-08	-0.2
19:46796502_A/C	M_VLDL_P	19	46796502	6920/1386/66	1518.26	0.09068	6e-09	-0.2
19:46796502_A/C	M_VLDL_PL	19	46796502	6920/1386/66	1518.26	0.09068	1e-08	-0.2
19:46796502_A/C	M_VLDL_TG	19	46796502	6920/1386/66	1518.26	0.09068	4e-09	-0.2
19:46796502_A/C	S_VLDL_P	19	46796502	6920/1386/66	1518.26	0.09068	5e-09	-0.2
19:46796502_A/C	S_VLDL_PL	19	46796502	6920/1386/66	1518.26	0.09068	2e-08	-0.2
19:46796502_A/C	S_VLDL_TG	19	46796502	6920/1386/66	1518.26	0.09068	3e-09	-0.2
19:46796502_A/C	TG	19	46796502	6920/1386/66	1518.26	0.09068	1e-08	-0.2
19:46796767_T/C	L_VLDL_P	19	46796767	6927/1379/66	1481.29	0.08847	3e-08	-0.2
19:46796767_T/C	L_VLDL_PL	19	46796767	6927/1379/66	1481.29	0.08847	4e-08	-0.2
19:46796767_T/C	L_VLDL_TG	19	46796767	6927/1379/66	1481.29	0.08847	1e-08	-0.2
19:46796767_T/C	M_VLDL_C	19	46796767	6927/1379/66	1481.29	0.08847	4e-08	-0.2
19:46796767_T/C	M_VLDL_FC	19	46796767	6927/1379/66	1481.29	0.08847	2e-08	-0.2
19:46796767_T/C	M_VLDL_P	19	46796767	6927/1379/66	1481.29	0.08847	6e-09	-0.2
19:46796767_T/C	M_VLDL_PL	19	46796767	6927/1379/66	1481.29	0.08847	9e-09	-0.2
19:46796767_T/C	M_VLDL_TG	19	46796767	6927/1379/66	1481.29	0.08847	4e-09	-0.2
19:46796767_T/C	S_VLDL_P	19	46796767	6927/1379/66	1481.29	0.08847	5e-09	-0.2
19:46796767_T/C	S_VLDL_PL	19	46796767	6927/1379/66	1481.29	0.08847	2e-08	-0.2
19:46796767_T/C	S_VLDL_TG	19	46796767	6927/1379/66	1481.29	0.08847	3e-09	-0.2
19:46796767_T/C	TG	19	46796767	6927/1379/66	1481.29	0.08847	1e-08	-0.2
19:46796768_G/A	L_VLDL_P	19	46796768	6927/1379/66	1481.56	0.08848	3e-08	-0.2
19:46796768_G/A	L_VLDL_PL	19	46796768	6927/1379/66	1481.56	0.08848	4e-08	-0.2
19:46796768_G/A	L_VLDL_TG	19	46796768	6927/1379/66	1481.56	0.08848	1e-08	-0.2
19:46796768_G/A	M_VLDL_C	19	46796768	6927/1379/66	1481.56	0.08848	4e-08	-0.2
19:46796768_G/A	M_VLDL_FC	19	46796768	6927/1379/66	1481.56	0.08848	2e-08	-0.2
19:46796768_G/A	M_VLDL_P	19	46796768	6927/1379/66	1481.56	0.08848	6e-09	-0.2
19:46796768_G/A	M_VLDL_PL	19	46796768	6927/1379/66	1481.56	0.08848	9e-09	-0.2
19:46796768_G/A	M_VLDL_TG	19	46796768	6927/1379/66	1481.56	0.08848	4e-09	-0.2
19:46796768_G/A	S_VLDL_P	19	46796768	6927/1379/66	1481.56	0.08848	5e-09	-0.2
19:46796768_G/A	S_VLDL_PL	19	46796768	6927/1379/66	1481.56	0.08848	2e-08	-0.2
19:46796768_G/A	S_VLDL_TG	19	46796768	6927/1379/66	1481.56	0.08848	3e-09	-0.2
19:46796768_G/A	TG	19	46796768	6927/1379/66	1481.56	0.08848	1e-08	-0.2
19:46797194_G/A	L_VLDL_P	19	46797194	6920/1386/66	1518.26	0.09067	3e-08	-0.2
19:46797194_G/A	L_VLDL_PL	19	46797194	6920/1386/66	1518.26	0.09067	5e-08	-0.2
19:46797194_G/A	L_VLDL_TG	19	46797194	6920/1386/66	1518.26	0.09067	1e-08	-0.2
19:46797194_G/A	M_VLDL_C	19	46797194	6920/1386/66	1518.26	0.09067	4e-08	-0.2
19:46797194_G/A	M_VLDL_FC	19	46797194	6920/1386/66	1518.26	0.09067	2e-08	-0.2
19:46797194_G/A	M_VLDL_P	19	46797194	6920/1386/66	1518.26	0.09067	6e-09	-0.2
19:46797194_G/A	M_VLDL_PL	19	46797194	6920/1386/66	1518.26	0.09067	1e-08	-0.2
19:46797194_G/A	M_VLDL_TG	19	46797194	6920/1386/66	1518.26	0.09067	4e-09	-0.2
19:46797194_G/A	S_VLDL_P	19	46797194	6920/1386/66	1518.26	0.09067	5e-09	-0.2
19:46797194_G/A	S_VLDL_PL	19	46797194	6920/1386/66	1518.26	0.09067	2e-08	-0.2
19:46797194_G/A	S_VLDL_TG	19	46797194	6920/1386/66	1518.26	0.09067	3e-09	-0.2
19:46797194_G/A	TG	19	46797194	6920/1386/66	1518.26	0.09067	1e-08	-0.2
19:46797233_T/C	L_VLDL_P	19	46797233	6920/1386/66	1518.24	0.09067	3e-08	-0.2
19:46797233_T/C	L_VLDL_PL	19	46797233	6920/1386/66	1518.24	0.09067	5e-08	-0.2
19:46797233_T/C	L_VLDL_TG	19	46797233	6920/1386/66	1518.24	0.09067	1e-08	-0.2
19:46797233_T/C	M_VLDL_C	19	46797233	6920/1386/66	1518.24	0.09067	4e-08	-0.2
19:46797233_T/C	M_VLDL_FC	19	46797233	6920/1386/66	1518.24	0.09067	2e-08	-0.2
19:46797233_T/C	M_VLDL_P	19	46797233	6920/1386/66	1518.24	0.09067	6e-09	-0.2
19:46797233_T/C	M_VLDL_PL	19	46797233	6920/1386/66	1518.24	0.09067	1e-08	-0.2
19:46797233_T/C	M_VLDL_TG	19	46797233	6920/1386/66	1518.24	0.09067	4e-09	-0.2
19:46797233_T/C	S_VLDL_P	19	46797233	6920/1386/66	1518.24	0.09067	5e-09	-0.2
19:46797233_T/C	S_VLDL_PL	19	46797233	6920/1386/66	1518.24	0.09067	2e-08	-0.2
19:46797233_T/C	S_VLDL_TG	19	46797233	6920/1386/66	1518.24	0.09067	3e-09	-0.2
19:46797233_T/C	TG	19	46797233	6920/1386/66	1518.24	0.09067	1e-08	-0.2
19:46797290_A/G	L_VLDL_P	19	46797290	6920/1386/66	1518.22	0.09067	3e-08	-0.2
19:46797290_A/G	L_VLDL_PL	19	46797290	6920/1386/66	1518.22	0.09067	5e-08	-0.2
19:46797290_A/G	L_VLDL_TG	19	46797290	6920/1386/66	1518.22	0.09067	1e-08	-0.2
19:46797290_A/G	M_VLDL_C	19	46797290	6920/1386/66	1518.22	0.09067	4e-08	-0.2
19:46797290_A/G	M_VLDL_FC	19	46797290	6920/1386/66	1518.22	0.09067	2e-08	-0.2
19:46797290_A/G	M_VLDL_P	19	46797290	6920/1386/66	1518.22	0.09067	6e-09	-0.2
19:46797290_A/G	M_VLDL_PL	19	46797290	6920/1386/66	1518.22	0.09067	1e-08	-0.2
19:46797290_A/G	M_VLDL_TG	19	46797290	6920/1386/66	1518.22	0.09067	4e-09	-0.2
19:46797290_A/G	S_VLDL_P	19	46797290	6920/1386/66	1518.22	0.09067	5e-09	-0.2
19:46797290_A/G	S_VLDL_PL	19	46797290	6920/1386/66	1518.22	0.09067	2e-08	-0.2
19:46797290_A/G	S_VLDL_TG	19	46797290	6920/1386/66	1518.22	0.09067	3e-09	-0.2
19:46797290_A/G	TG	19	46797290	6920/1386/66	1518.22	0.09067	1e-08	-0.2
19:46797295_A/G	L_VLDL_P	19	46797295	6920/1386/66	1518.21	0.09067	3e-08	-0.2
19:46797295_A/G	L_VLDL_PL	19	46797295	6920/1386/66	1518.21	0.09067	5e-08	-0.2
19:46797295_A/G	L_VLDL_TG	19	46797295	6920/1386/66	1518.21	0.09067	1e-08	-0.2
19:46797295_A/G	M_VLDL_C	19	46797295	6920/1386/66	1518.21	0.09067	4e-08	-0.2
19:46797295_A/G	M_VLDL_FC	19	46797295	6920/1386/66	1518.21	0.09067	2e-08	-0.2
19:46797295_A/G	M_VLDL_P	19	46797295	6920/1386/66	1518.21	0.09067	6e-09	-0.2
19:46797295_A/G	M_VLDL_PL	19	46797295	6920/1386/66	1518.21	0.09067	1e-08	-0.2
19:46797295_A/G	M_VLDL_TG	19	46797295	6920/1386/66	1518.21	0.09067	4e-09	-0.2
19:46797295_A/G	S_VLDL_P	19	46797295	6920/1386/66	1518.21	0.09067	5e-09	-0.2
19:46797295_A/G	S_VLDL_PL	19	46797295	6920/1386/66	1518.21	0.09067	2e-08	-0.2
19:46797295_A/G	S_VLDL_TG	19	46797295	6920/1386/66	1518.21	0.09067	3e-09	-0.2
19:46797295_A/G	TG	19	46797295	6920/1386/66	1518.21	0.09067	1e-08	-0.2
19:46799835_G/T	M_VLDL_TG	19	46799835	7130/1190/52	1294.01	0.07728	5e-08	-0.2
19:46799835_G/T	S_VLDL_TG	19	46799835	7130/1190/52	1294.01	0.07728	3e-08	-0.2
19:46800136_T/TCC	L_VLDL_P	19	46800136	6919/1387/66	1519.39	0.09074	3e-08	-0.2
19:46800136_T/TCC	L_VLDL_PL	19	46800136	6919/1387/66	1519.39	0.09074	5e-08	-0.2
19:46800136_T/TCC	L_VLDL_TG	19	46800136	6919/1387/66	1519.39	0.09074	1e-08	-0.2
19:46800136_T/TCC	M_VLDL_C	19	46800136	6919/1387/66	1519.39	0.09074	4e-08	-0.2
19:46800136_T/TCC	M_VLDL_FC	19	46800136	6919/1387/66	1519.39	0.09074	2e-08	-0.2
19:46800136_T/TCC	M_VLDL_P	19	46800136	6919/1387/66	1519.39	0.09074	6e-09	-0.2
19:46800136_T/TCC	M_VLDL_PL	19	46800136	6919/1387/66	1519.39	0.09074	1e-08	-0.2
19:46800136_T/TCC	M_VLDL_TG	19	46800136	6919/1387/66	1519.39	0.09074	4e-09	-0.2
19:46800136_T/TCC	S_VLDL_P	19	46800136	6919/1387/66	1519.39	0.09074	5e-09	-0.2
19:46800136_T/TCC	S_VLDL_PL	19	46800136	6919/1387/66	1519.39	0.09074	2e-08	-0.2
19:46800136_T/TCC	S_VLDL_TG	19	46800136	6919/1387/66	1519.39	0.09074	3e-09	-0.2
19:46800136_T/TCC	TG	19	46800136	6919/1387/66	1519.39	0.09074	1e-08	-0.2
19:46800433_G/A	L_VLDL_P	19	46800197	6920/1386/66	1518	0.09066	3e-08	-0.2
19:46800433_G/A	L_VLDL_TG	19	46800197	6920/1386/66	1518	0.09066	1e-08	-0.2
19:46800433_G/A	M_VLDL_C	19	46800197	6920/1386/66	1518	0.09066	4e-08	-0.2
19:46800433_G/A	M_VLDL_FC	19	46800197	6920/1386/66	1518	0.09066	2e-08	-0.2
19:46800433_G/A	M_VLDL_P	19	46800197	6920/1386/66	1518	0.09066	6e-09	-0.2
19:46800433_G/A	M_VLDL_PL	19	46800197	6920/1386/66	1518	0.09066	1e-08	-0.2
19:46800433_G/A	M_VLDL_TG	19	46800197	6920/1386/66	1518	0.09066	4e-09	-0.2
19:46800433_G/A	S_VLDL_P	19	46800197	6920/1386/66	1518	0.09066	5e-09	-0.2
19:46800433_G/A	S_VLDL_PL	19	46800197	6920/1386/66	1518	0.09066	2e-08	-0.2
19:46800433_G/A	S_VLDL_TG	19	46800197	6920/1386/66	1518	0.09066	3e-09	-0.2
19:46800433_G/A	TG	19	46800197	6920/1386/66	1518	0.09066	1e-08	-0.2
19:46800433_G/A	L_VLDL_P	19	46800228	6920/1386/66	1518	0.09066	3e-08	-0.2
19:46800433_G/A	L_VLDL_TG	19	46800228	6920/1386/66	1518	0.09066	1e-08	-0.2
19:46800433_G/A	M_VLDL_C	19	46800228	6920/1386/66	1518	0.09066	4e-08	-0.2
19:46800433_G/A	M_VLDL_FC	19	46800228	6920/1386/66	1518	0.09066	2e-08	-0.2
19:46800433_G/A	M_VLDL_P	19	46800228	6920/1386/66	1518	0.09066	6e-09	-0.2
19:46800433_G/A	M_VLDL_PL	19	46800228	6920/1386/66	1518	0.09066	1e-08	-0.2
19:46800433_G/A	M_VLDL_TG	19	46800228	6920/1386/66	1518	0.09066	4e-09	-0.2
19:46800433_G/A	S_VLDL_P	19	46800228	6920/1386/66	1518	0.09066	5e-09	-0.2
19:46800433_G/A	S_VLDL_PL	19	46800228	6920/1386/66	1518	0.09066	2e-08	-0.2
19:46800433_G/A	S_VLDL_TG	19	46800228	6920/1386/66	1518	0.09066	3e-09	-0.2
19:46800433_G/A	TG	19	46800228	6920/1386/66	1518	0.09066	1e-08	-0.2
19:46800433_G/A	S_VLDL_P	19	46800433	6058/2140/174	2487.99	0.14859	3e-08	-0.1
19:46800433_G/A	S_VLDL_TG	19	46800433	6058/2140/174	2487.99	0.14859	4e-08	-0.1
19:46802122_A/T	M_VLDL_TG	19	46802122	6041/2155/176	2503.94	0.14954	4e-08	-0.1
19:46802122_A/T	S_VLDL_P	19	46802122	6041/2155/176	2503.94	0.14954	2e-08	-0.1
19:46802122_A/T	S_VLDL_TG	19	46802122	6041/2155/176	2503.94	0.14954	3e-08	-0.1
19:46802122_A/T	TG	19	46802122	6041/2155/176	2503.94	0.14954	5e-08	-0.1
19:46803802_C/T	S_VLDL_P	19	46803802	6058/2140/174	2482.24	0.14825	4e-08	-0.1
19:46803802_C/T	S_VLDL_TG	19	46803802	6058/2140/174	2482.24	0.14825	5e-08	-0.1
19:46814003_C/G	M_VLDL_TG	19	46814003	6903/1405/64	1531.58	0.09147	4e-08	-0.2
19:46814003_C/G	S_VLDL_TG	19	46814003	6903/1405/64	1531.58	0.09147	2e-08	-0.2
20:44067565_T/C	L_HDL_FC	20	44067565	8235/137/0	136.89	0.00818	4e-08	0.5
20:44067565_T/C	L_HDL_P	20	44067565	8235/137/0	136.89	0.00818	3e-09	0.5
20:44067565_T/C	L_HDL_PL	20	44067565	8235/137/0	136.89	0.00818	6e-09	0.5
Trait, subclass trait (defined in Table S1); Chr, chromosome; Genotype counts for homozygous reference allele/heterozygous/homozygous alternate allele; MAC, minor allele count; MAF, minor allele frequency; P-value, p-value for the variant after conditioning on 885 known lipid-associated variants (Table S5); Beta, effect size of the alternate allele. Variants with MAF<0.001 were excluded from anal…
